# Supplementary material for: Developmental plasticity of epithelial stem cells in tooth and taste bud renewal
Source: PubMed Central journal article supplement — Proc Natl Acad Sci U S A. 2019 Aug 19;116(36):17858–66. doi: 10.1073/pnas.1821202116 (PMC6731641; doi:10.1073/pnas.1821202116), 2019-08-19
Supplement: pnas.1821202116.sd01.pdf [file pnas.1821202116.sd01.pdf]

| Cichlid_GeneID | GeneName (Human Ortholog) | Description     | logFC      | P.Value    |
|----------------|---------------------------|-----------------|------------|------------|
| aanat          | AANAT                     | aralkylamine    | -3.5289353 | 0.00438605 |
| aars2          | AARS2                     | alanyl-tRNA s   | -5.0509256 | 3.26E-05   |
| aasdh          | AASDH                     | aminoadipate    | -9.3172152 | 1.23E-13   |
| abcf3          | ABCF3                     | ATP-binding c   | -4.5538683 | 0.00044009 |
| LOC101469557   | ABHD12                    | abhydrolase c   | -4.6065848 | 2.16E-07   |
| abhd16a        | ABHD16A                   | abhydrolase c   | -3.1498871 | 0.0078678  |
| LOC101474210   | ABI3BP                    | ABI family, m   | -4.9831925 | 0.00010346 |
| abl2           | ABL2                      | v-abl Abelson   | -5.5681401 | 0.00013176 |
| abt1           | ABT1                      | activator of b  | -4.0386603 | 0.00061494 |
| acat2          | ACAT2                     | acetyl-CoA ac   | -3.4866658 | 0.00020643 |
| ace2           | ACE2                      | angiotensin I   | -7.0494774 | 5.26E-11   |
| acer1          | ACER1                     | alkaline cerar  | -7.1628266 | 2.09E-08   |
| LOC106676906   | ACOT11                    | acyl-CoA thio   | -4.5627744 | 0.00024523 |
| LOC101484036   | ACP5                      | acid phospho    | -5.7927255 | 2.17E-06   |
| LOC101476622   | ACTB                      | actin, beta [S  | -6.2493126 | 2.07E-08   |
| actn3          | ACTN2                     | actinin, alpha  | -2.8066137 | 0.00773227 |
| LOC101467323   | ACVR1                     | activin A rece  | -2.9139681 | 0.00021413 |
| LOC101464677   | ACY3                      | aspartoacylas   | -3.3271638 | 0.00231881 |
| LOC101479803   | ACY3                      | aspartoacylas   | -2.5036492 | 0.00660774 |
| LOC101465362   | ACYP2                     | acylphosphat    | -6.7275296 | 3.75E-09   |
| LOC101473447   | ADAM9                     | ADAM metall     | -4.1954336 | 0.00103951 |
| LOC101464246   | ADH4                      | alcohol dehyd   | -3.2472517 | 0.00658593 |
| adipor2        | ADIPOR2                   | adiponectin r   | -5.6681701 | 5.48E-05   |
| LOC105941219   | ADM                       | adrenomedul     | -3.5795871 | 0.00181082 |
| LOC101478205   | ADSS                      | adenylosuccir   | -6.0098743 | 3.35E-07   |
| LOC101481961   | ADTRP                     | androgen-dej    | -1.8392015 | 0.00730245 |
| LOC101487596   | AEN                       | apoptosis enl   | -5.7214987 | 1.98E-06   |
| LOC101480149   | AGXT                      | alanine-glyox   | -3.3810457 | 0.00206802 |
| LOC101482817   | AGXT                      | alanine-glyox   | -2.6022544 | 0.01102592 |
| phykpl         | AGXT2L2                   | alanine-glyox   | -2.36839   | 0.000156   |
| LOC106674550   | AHNAK                     | AHNAK nucle     | -5.6439179 | 1.50E-06   |
| LOC101466712   | AIM1L                     | absent in mel   | -3.5704198 | 0.00530782 |
| aimp1          | AIMP1                     | aminoacyl tRI   | -3.4589824 | 0.00509645 |
| ak4            | AK4                       | adenylate kin   | -3.8679781 | 0.00301018 |
| akip1          | AKIP1                     | A kinase (PRK   | -6.4827592 | 5.70E-07   |
| LOC101487903   | ALDOB                     | aldolase B, fru | -3.5712908 | 0.00365051 |
| LOC101475106   | ALG11                     | asparagine-lir  | -4.5681529 | 1.17E-07   |
| alg12          | ALG12                     | asparagine-lir  | -3.4492097 | 0.00232925 |
| alkbh1         | ALKBH1                    | alkB, alkylatic | -3.6964259 | 0.00134813 |
| LOC101479875   | AMICA1                    | adhesion mol    | -2.937695  | 0.01136543 |

|              |          |                |            |            |
|--------------|----------|----------------|------------|------------|
| LOC101478708 | AMOT     | angiomotin [S  | -3.3566769 | 0.00626071 |
| LOC101473164 | AMPD3    | adenosine mo   | -5.2306346 | 0.00012571 |
| anapc2       | ANAPC2   | anaphase pro   | -4.7705619 | 0.00015854 |
| ankfy1       | ANKFY1   | ankyrin repea  | -2.80099   | 0.00034854 |
| ankrd22      | ANKRD22  | ankyrin repea  | -3.0272516 | 0.00994805 |
| ankrd61      | ANKRD61  | ankyrin repea  | -2.1666121 | 0.00286499 |
| anks1a       | ANKS1A   | ankyrin repea  | -3.7452728 | 0.00085599 |
| ano1         | ANO1     | anoctamin 1,   | -3.8091656 | 0.00266089 |
| LOC101483809 | ANXA1    | annexin A1 [S  | -7.5898567 | 2.14E-08   |
| anxa1        | ANXA1    | annexin A1 [S  | -4.2780184 | 2.07E-05   |
| LOC101468000 | ANXA11   | annexin A11    | -3.8902902 | 0.00028888 |
| LOC101486457 | AP1G2    | adaptor-relat  | -3.3164052 | 0.00403545 |
| LOC101476758 | AP1M2    | adaptor-relat  | -4.3725153 | 0.0005461  |
| LOC101487710 | AP1S3    | adaptor-relat  | -4.1660901 | 0.0016154  |
| LOC101484620 | APBA1    | amyloid beta   | -3.1446659 | 0.00376277 |
| apc2         | APC2     | adenomatosi:   | -3.6164604 | 4.42E-05   |
| apmap        | APMAP    | adipocyte pla  | -5.560602  | 1.80E-05   |
| LOC101472019 | APOA1    | apolipoprotei  | -3.7840035 | 0.0004276  |
| LOC101479002 | APOLD1   | apolipoprotei  | -4.8817968 | 0.00010631 |
| LOC101466403 | AQP3     | aquaporin 3 (  | -6.0348324 | 3.32E-06   |
| ar           | AR       | androgen rec   | -4.6185909 | 0.00014025 |
| LOC101481239 | AREG     | amphiregulin   | -3.205355  | 0.0107162  |
| LOC101474876 | ARHGAP4  | Rho GTPase a   | -3.4247387 | 0.0061049  |
| arhgap42     | ARHGAP42 | Rho GTPase a   | -3.605956  | 0.0081964  |
| LOC101478428 | ARHGEF15 | Rho guanine    | -4.3778932 | 0.00017045 |
| arhgef16     | ARHGEF16 | Rho guanine    | -3.8504701 | 0.00059199 |
| LOC101480595 | ARHGEF18 | Rho/Rac guar   | -2.6269367 | 0.00799061 |
| LOC101485626 | ARHGEF19 | Rho guanine    | -3.0250532 | 0.00250456 |
| arhgef38     | ARHGEF38 | Rho guanine    | -3.2186377 | 0.00144513 |
| LOC101465638 | ARID5A   | AT rich intera | -3.55332   | 0.00194718 |
| arl4a        | ARL4A    | ADP-ribosylat  | -4.0783732 | 0.00065485 |
| nrap         | ARL5B    | ADP-ribosylat  | -3.7131002 | 0.00137612 |
| arl9         | ARL9     | ADP-ribosylat  | -4.0327991 | 0.00115676 |
| LOC101487707 | ARMC1    | armadillo rep  | -5.8625432 | 1.42E-05   |
| armc3        | ARMC3    | armadillo rep  | -4.3666456 | 0.00012621 |
| LOC101471957 | ARPC1A   | actin related  | -5.4718691 | 1.81E-05   |
| LOC101487389 | ARRDC1   | arrestin doma  | -2.9807923 | 0.00474286 |
| LOC101478001 | AS3MT    | arsenic (+3 o) | -3.8852987 | 0.000606   |
| asb12        | ASB12    | ankyrin repea  | -2.2146464 | 0.00028854 |
| asb14        | ASB14    | ankyrin repea  | -1.8881786 | 0.00613077 |
| asb7         | ASB7     | ankyrin repea  | -3.4446576 | 0.0070932  |

|              |          |                |            |            |
|--------------|----------|----------------|------------|------------|
| ass1         | ASS1     | argininosucci  | -4.5787345 | 0.00085655 |
| LOC101472547 | ASTE1    | asteroid hom   | -5.0176944 | 1.01E-05   |
| LOC101485633 | ASTL     | astacin-like r | -3.8374703 | 4.37E-06   |
| atat1        | ATAT1    | alpha tubulin  | -8.0276443 | 1.32E-11   |
| atp10b       | ATP10B   | ATPase, class  | -3.4275408 | 0.00144141 |
| atp13a2      | ATP13A2  | ATPase type :  | -3.1067007 | 0.00340096 |
| atp8b1       | ATP8B1   | ATPase, amin   | -3.1248851 | 0.00506389 |
| atp8b4       | ATP8B4   | ATPase, class  | -6.711058  | 3.44E-07   |
| LOC101479299 | AVIL     | advillin [Sour | -3.3645602 | 0.00792656 |
| avpr2        | AVPR2    | arginine vaso  | -4.8543544 | 7.96E-05   |
| LOC101485333 | B3GALT5  | UDP-Gal:beta   | -6.1877809 | 1.67E-07   |
| LOC101465145 | B3GALT5  | UDP-Gal:beta   | -3.0177403 | 0.00419685 |
| LOC101465460 | B3GALT5  | UDP-Gal:beta   | -2.9684003 | 0.00657817 |
| LOC101486761 | B4GALT1  | UDP-Gal:beta   | -2.999639  | 0.00970185 |
| bag4         | BAG4     | BCL2-associat  | -4.8036233 | 3.53E-05   |
| baiap2l1     | BAIAP2L1 | BAI1-associat  | -3.8993398 | 0.00167884 |
| LOC101468796 | BANF1    | barrier to aut | -4.5139227 | 0.00016733 |
| LOC101480297 | BANF2    | barrier to aut | -4.0894139 | 0.0002308  |
| barx2        | BARX2    | BARX homeol    | -3.7156722 | 0.00697085 |
| LOC101473120 | BCOR     | BCL6 corepre   | -3.4507028 | 0.00211749 |
| LOC101469974 | BDKRB1   | bradykinin re  | -6.9510191 | 5.71E-08   |
| bfsp2        | BFSP2    | beaded filam   | -7.0699864 | 9.66E-08   |
| LOC101487058 | BICD2    | bicaudal D hc  | -3.5661311 | 0.00095156 |
| LOC101465152 | BICD2    | bicaudal D hc  | -2.7074812 | 0.01143143 |
| blcap        | BLCAP    | bladder canc   | -3.7119839 | 0.0030606  |
| blzf1        | BLZF1    | basic leucine  | -2.9959707 | 0.00801464 |
| LOC101467782 | BMPR1A   | bone morphc    | -3.1407411 | 0.00550417 |
| LOC101474392 | BNIP2    | BCL2/adenov    | -5.4831057 | 3.60E-06   |
| LOC101480739 | BOK      | BCL2-related   | -3.552707  | 0.00532377 |
| brat1        | BRAT1    | BRCA1-associ   | -1.8835692 | 0.00719716 |
| LOC101483850 | BRD4     | bromodomai     | -5.6175759 | 3.59E-06   |
| LOC101472078 | BRSK2    | BR serine/thr  | -3.6483507 | 1.20E-05   |
| LOC101466116 | BTBD11   | BTB (POZ) do   | -4.9236899 | 9.41E-05   |
| btbd3        | BTBD3    | BTB (POZ) do   | -2.7517403 | 0.00701694 |
| LOC101481147 | BTBD6    | BTB (POZ) do   | -3.3622354 | 0.00035222 |
| bzrap1       | BZRAP1   | benzodiazapi   | -3.3134085 | 0.00477883 |
| LOC101483108 | BZRAP1   | benzodiazapi   | -2.2441168 | 0.00545826 |
| ddias        | C11orf82 | chromosome     | -4.3733562 | 0.00045486 |
| LOC105941258 | C11orf89 | chromosome     | -5.4164638 | 2.72E-08   |
| faap100      | C17orf70 | chromosome     | -3.1456378 | 0.00380504 |
| LOC101473408 | C18orf8  | chromosome     | -3.5437122 | 0.00215289 |

|              |          |                |            |            |
|--------------|----------|----------------|------------|------------|
| LOC101481331 | C1orf106 | chromosome     | -3.4367403 | 0.0071006  |
| LOC101473750 | C1orf172 | chromosome     | -3.615942  | 0.00061598 |
| LOC101484289 | C21orf2  | chromosome     | -3.2614295 | 0.00036535 |
| LOC101482640 | C22orf23 | chromosome     | -3.5094001 | 0.00938698 |
| LOC101473019 | C2orf42  | chromosome     | -8.4416053 | 6.47E-09   |
| LOC101466831 | C3orf52  | chromosome     | -3.5630892 | 0.00191009 |
| c6           | C6       | complement     | -4.0490554 | 0.00322963 |
| tbc1d32      | C6orf170 | chromosome     | -2.9789431 | 0.0054282  |
| LOC101478077 | C6orf174 | C6orf174 pro   | -2.5207361 | 0.0117835  |
| LOC101481886 | C7orf62  | chromosome     | -5.3991589 | 6.18E-06   |
| ca5a         | CA5A     | carbonic anhy  | -4.3063804 | 0.00070005 |
| LOC101465884 | CABP2    | calcium bindi  | -5.7716753 | 3.56E-05   |
| LOC101475539 | CABP4    | calcium bindi  | -2.2951414 | 0.00315768 |
| cacna1i      | CACNA1I  | calcium chan   | -4.4316343 | 0.00065635 |
| LOC101466725 | CACNB4   | calcium chan   | -5.7753632 | 8.29E-05   |
| cad          | CAD      | carbamoysl-ph  | -7.8667793 | 4.00E-09   |
| LOC101468863 | CAPN1    | calpain 1, (m  | -3.9403287 | 0.0002174  |
| LOC101486012 | CAPN14   | calpain 14 [Sc | -13.645225 | 1.69E-15   |
| LOC101473607 | CAPN14   | calpain 14 [Sc | -3.6614021 | 0.00049174 |
| LOC101468385 | CAPN2    | calpain 2, (m  | -3.1068496 | 0.00138666 |
| capn9        | CAPN9    | calpain 9 [Sou | -9.7218743 | 1.49E-10   |
| capn12       | CAPN9    | calpain 9 [Sou | -5.7720494 | 8.26E-07   |
| LOC101473853 | CAPNS2   | calpain, small | -3.7666696 | 0.00357144 |
| card14       | CARD10   | caspase recru  | -5.5082633 | 7.91E-06   |
| LOC101478214 | CARD6    | caspase recru  | -8.5505972 | 1.05E-09   |
| LOC101487093 | CASKIN2  | CASK interact  | -3.6787856 | 0.00343129 |
| LOC106676547 | CASP6    | caspase 6, ap  | -3.8879386 | 0.00032014 |
| LOC101478827 | CASP8    | caspase 8, ap  | -2.9671906 | 0.00547159 |
| LOC101486104 | CASQ1    | calsequestrin  | -2.8112861 | 0.00677663 |
| LOC101467330 | CASQ1    | calsequestrin  | -2.7517403 | 0.00701694 |
| cast         | CAST     | calpastatin [S | -3.5349227 | 4.40E-05   |
| LOC101465189 | CBR1     | carbonyl redu  | -3.519469  | 0.00487593 |
| LOC101487143 | CBS      | cystathionine  | -8.7540045 | 8.19E-13   |
| LOC101479719 | CBS      | cystathionine  | -2.6022544 | 0.01102592 |
| ccdc12       | CCDC12   | coiled-coil do | -4.7079878 | 0.00027914 |
| ccdc146      | CCDC146  | coiled-coil do | -3.1454651 | 0.00555552 |
| ccdc167      | CCDC167  | coiled-coil do | -3.0123576 | 0.00713519 |
| ccdc50       | CCDC50   | coiled-coil do | -3.806149  | 0.00044202 |
| LOC101475644 | CCDC64B  | coiled-coil do | -5.6891878 | 8.44E-06   |
| LOC101484920 | CCDC64B  | coiled-coil do | -4.2665663 | 0.00080191 |
| ccdc86       | CCDC86   | coiled-coil do | -3.1851833 | 0.00870037 |

|              |          |                  |            |            |
|--------------|----------|------------------|------------|------------|
| ccdc97       | CCDC97   | coiled-coil do   | -3.8285322 | 3.78E-05   |
| LOC106675061 | CCKAR    | cholecystokin    | -3.3371008 | 0.00288387 |
| cckar        | CCKAR    | cholecystokin    | -3.3234734 | 0.00313464 |
| LOC101467602 | CCL19    | chemokine (C     | -4.4280797 | 0.00019729 |
| LOC101472946 | CCL20    | chemokine (C     | -6.7204899 | 1.07E-07   |
| LOC101475896 | CCL20    | chemokine (C     | -3.5245688 | 0.00059731 |
| LOC106676255 | CCL25    | chemokine (C     | -4.4958334 | 1.30E-05   |
| ccndbp1      | CCNDBP1  | cyclin D-type    | -4.4105507 | 0.00014356 |
| LOC101486478 | CCNE2    | cyclin E2 [Sou   | -2.235771  | 0.00779636 |
| LOC101478668 | CCR9     | chemokine (C     | -4.6318568 | 7.37E-05   |
| ccs          | CCS      | copper chape     | -6.7415713 | 1.08E-06   |
| LOC101470447 | CCSAP    | centriole, cilia | -3.4818383 | 0.00774099 |
| LOC101479353 | CD101    | CD101 molec      | -3.693486  | 0.00604319 |
| cd109        | CD109    | CD109 molec      | -6.9757619 | 2.49E-07   |
| LOC106674898 | CD22     | CD22 molecu      | -3.5153964 | 0.00271779 |
| LOC101486696 | CD22     | CD22 molecu      | -3.5084766 | 0.00072676 |
| LOC106675279 | CD276    | CD276 molec      | -4.6424962 | 2.51E-05   |
| LOC101486239 | CD300LG  | CD300 molec      | -7.6572874 | 1.30E-08   |
| LOC105941287 | CD300LG  | CD300 molec      | -4.1121189 | 0.00064275 |
| LOC101476613 | CD4      | CD4 molecule     | -11.988141 | 1.06E-13   |
| LOC101467428 | CD53     | CD53 molecu      | -2.8796378 | 0.0062699  |
| LOC101467196 | CD86     | CD86 molecu      | -5.9080775 | 9.27E-07   |
| LOC106676430 | CD86     | CD86 molecu      | -3.7478329 | 0.00087441 |
| LOC101486014 | CD86     | CD86 molecu      | -3.7467182 | 0.00033687 |
| LOC101486694 | CD86     | CD86 molecu      | -3.5924346 | 0.00261079 |
| LOC101485270 | CD86     | CD86 molecu      | -3.5040393 | 0.00181857 |
| LOC106674899 | CD86     | CD86 molecu      | -3.3471802 | 0.00205361 |
| LOC106676048 | CD86     | CD86 molecu      | -3.1870453 | 0.0018869  |
| LOC101470971 | CD8A     | CD8a molecu      | -5.1230142 | 5.01E-06   |
| cdadc1       | CDADC1   | cytidine and c   | -2.9619134 | 0.00437532 |
| cdc123       | CDC123   | cell division c  | -3.747179  | 0.00189734 |
| LOC101479607 | CDC42    | cell division c  | -3.10783   | 0.00988542 |
| LOC101477078 | CDH12    | cadherin 12, t   | -5.1176785 | 9.31E-05   |
| cdh20        | CDH20    | cadherin 20, t   | -4.2685573 | 0.00039088 |
| LOC101469563 | CDIP1    | cell death-inc   | -11.741215 | 9.61E-15   |
| cdipt        | CDIPT    | CDP-diacylgly    | -3.0943142 | 0.00941257 |
| LOC101474553 | CDKN1A   | cyclin-depend    | -5.0508934 | 9.91E-05   |
| LOC101477495 | CDR2L    | cerebellar de    | -3.5245575 | 0.00467435 |
| LOC101467689 | CEACAM21 | carcinoembry     | -5.3225732 | 9.32E-06   |
| LOC101485975 | CEBPB    | CCAAT/enhar      | -3.3236485 | 0.00126847 |
| cebpd        | CEBPD    | CCAAT/enhar      | -5.4495497 | 2.65E-07   |

|              |         |                 |            |            |
|--------------|---------|-----------------|------------|------------|
| cecr6        | CECR6   | cat eye syndr   | -3.390943  | 0.00504226 |
| cep152       | CEP152  | centrosomal     | -3.8280926 | 0.0013882  |
| LOC101474144 | CERK    | ceramide kin    | -5.264449  | 3.18E-05   |
| cetp         | CETP    | cholesteryl es  | -3.0387785 | 0.00610321 |
| LOC101476252 | CFP     | complement      | -8.5226839 | 6.53E-12   |
| LOC101478526 | CGNL1   | cingulin-like 1 | -6.3583342 | 2.01E-07   |
| LOC101481696 | CHAC1   | ChaC, cation f  | -4.8543799 | 0.00016837 |
| chac1        | CHAC1   | ChaC, cation f  | -4.1487771 | 0.00340632 |
| chchd2       | chchd2  | coiled-coil-he  | -3.8129294 | 0.00231057 |
| LOC101485554 | CHL1    | cell adhesion   | -2.8658632 | 0.00763968 |
| LOC101480991 | CHMP6   | charged mult    | -3.1126219 | 0.0026774  |
| chpf2        | CHPF2   | chondroitin p   | -9.4928447 | 5.16E-13   |
| LOC101470861 | CHRNA2  | cholinergic re  | -4.3622305 | 0.00092511 |
| LOC101467859 | CHST1   | carbohydrate    | -3.5749273 | 0.00114109 |
| LOC101477544 | CHST8   | carbohydrate    | -5.5719504 | 1.75E-06   |
| cinp         | CINP    | cyclin-depend   | -2.881329  | 0.00258544 |
| cish         | CISH    | cytokine indu   | -2.3274866 | 0.00159455 |
| LOC101479976 | CLDN18  | claudin 18 [Sc  | -3.2118506 | 0.00513398 |
| LOC101472769 | CLDN23  | claudin 23 [Sc  | -5.3719318 | 1.06E-05   |
| LOC101476456 | CLDN7   | claudin 7 [Sou  | -6.5793135 | 1.91E-06   |
| LOC101476694 | CLDN8   | claudin 8 [Sou  | -7.800482  | 1.18E-09   |
| LOC101466430 | CLDN8   | claudin 8 [Sou  | -7.3076768 | 8.29E-09   |
| LOC101480961 | CLDN8   | claudin 8 [Sou  | -3.8401255 | 0.00099455 |
| LOC101475374 | CLDN8   | claudin 8 [Sou  | -3.71101   | 0.00134039 |
| LOC101464975 | CLDN8   | claudin 8 [Sou  | -3.2021314 | 0.00389906 |
| LOC101475811 | CLDN8   | claudin 8 [Sou  | -2.8580946 | 0.00414315 |
| LOC101481769 | CLEC3B  | C-type lectin   | -3.5251898 | 4.56E-07   |
| LOC101481774 | CLIC3   | chloride intra  | -8.0135964 | 1.69E-09   |
| clip3        | CLIP3   | CAP-GLY dom     | -4.0647122 | 0.00063604 |
| LOC106675732 | CLMP    | CXADR-like m    | -4.0511512 | 9.46E-05   |
| clta         | CLTA    | clathrin, light | -3.3055709 | 0.00512672 |
| LOC101469899 | CLUH    | clustered mit   | -2.9939616 | 0.00695201 |
| LOC101479291 | CLUL1   | clusterin-like  | -3.5255358 | 5.99E-06   |
| fsd2         | CMYA5   | cardiomyopa     | -1.9926177 | 0.00550919 |
| LOC101469064 | CNDP2   | CNDP dipepti    | -4.0906891 | 0.0025254  |
| LOC101468473 | CNDP2   | CNDP dipepti    | -2.8796378 | 0.0062699  |
| LOC105940421 | CNGA3   | cyclic nucleot  | -3.5706884 | 0.00065715 |
| cnot10       | CNOT10  | CCR4-NOT tra    | -4.3968171 | 9.74E-05   |
| cnst         | CNST    | consortin, coi  | -6.4410592 | 2.41E-05   |
| col19a1      | COL19A1 | collagen, type  | -3.4629599 | 0.00150951 |
| LOC101477258 | COL28A1 | collagen, type  | -4.7713106 | 0.00014247 |

|              |         |                 |            |            |
|--------------|---------|-----------------|------------|------------|
| commd1       | COMMD1  | copper metal    | -2.9697672 | 0.0056482  |
| commd5       | COMMD5  | COMM doma       | -2.9052351 | 0.00702872 |
| commd6       | commd6  | COMM doma       | -3.2764442 | 0.00164211 |
| LOC101484041 | CORO6   | coronin 6 [So   | -5.973905  | 2.57E-05   |
| LOC101487158 | COX17   | cytochrome c    | -3.4361197 | 0.0082244  |
| cpox         | CPOX    | coproporphyr    | -2.3745666 | 0.00191241 |
| cps1         | CPS1    | carbamoyl-ph    | -4.6049008 | 0.0003075  |
| LOC101477396 | CR1L    | complement      | -2.4070868 | 0.00086544 |
| LOC101486360 | CRADD   | CASP2 and RI    | -2.8854426 | 0.00591975 |
| crip1        | CRIP2   | cysteine-rich   | -5.4800138 | 5.46E-05   |
| LOC101471604 | CRIP2   | cysteine-rich   | -3.3020604 | 0.00878971 |
| crtc3        | CRTC3   | CREB regulat    | -3.3987614 | 0.0046072  |
| LOC101480452 | CRY1    | cryptochrome    | -4.3466674 | 0.00077118 |
| ctc1         | ctc1    | CTS telomere    | -2.2964543 | 0.00718364 |
| ctif         | CTIF    | CBP80/20-de     | -3.0627065 | 0.00902254 |
| ctsh         | CTSH    | cathepsin H [   | -3.2181679 | 0.00433495 |
| LOC101485929 | CTSS    | cathepsin S [S  | -2.8596395 | 0.00996434 |
| LOC101485887 | CXXC11  | CXXC finger p   | -4.250939  | 0.00042799 |
| LOC101468594 | CYCS    | cytochrome c    | -3.5249121 | 0.00315183 |
| LOC101481861 | CYGB    | cytoglobin [Sc  | -3.7972865 | 0.00153814 |
| LOC101463871 | CYP11B2 | cytochrome F    | -3.6919124 | 0.00034566 |
| LOC101472203 | CYP1A1  | cytochrome F    | -3.1747873 | 0.00551154 |
| LOC101478374 | CYP27A1 | cytochrome F    | -4.7835622 | 9.28E-05   |
| LOC101473743 | CYP27A1 | cytochrome F    | -4.0377855 | 0.00034226 |
| LOC101481994 | CYP2D6  | cytochrome F    | -2.8796378 | 0.0062699  |
| LOC101472746 | CYP2J2  | cytochrome F    | -3.6908013 | 0.00106571 |
| LOC101471528 | CYP3A43 | cytochrome F    | -5.6841522 | 1.86E-05   |
| LOC101477063 | CYP3A43 | cytochrome F    | -3.1927746 | 0.011206   |
| cyth3        | CYTH3   | cytohesin 3 [S  | -2.2328178 | 0.00216519 |
| LOC101464010 | DAB2IP  | DAB2 interact   | -7.2045413 | 5.91E-07   |
| dazap1       | DAZAP1  | DAZ associat    | -4.2041979 | 0.00061878 |
| LOC101468996 | DBNL    | drebrin-like [S | -3.8403962 | 0.00147083 |
| LOC101484131 | DCAF7   | DDB1 and CU     | -2.4180582 | 0.00205158 |
| LOC101465766 | DCK     | deoxycytidine   | -3.0133401 | 0.00529606 |
| ddc          | DDC     | dopa decarbc    | -8.2474031 | 8.56E-09   |
| ddx43        | DDX43   | DEAD (Asp-Gl    | -4.2985593 | 0.00020964 |
| kiaa0907     | DDX46   | DEAD (Asp-Gl    | -3.4240183 | 0.00050944 |
| LOC101480720 | DENND1A | DENN/MADD       | -5.4964791 | 4.83E-06   |
| dffa         | DFFA    | DNA fragmen     | -3.0165173 | 0.00924487 |
| LOC101474081 | DGUOK   | deoxyguanos     | -3.4718851 | 0.00137076 |
| dhrs11       | DHRS11  | dehydrogena     | -4.3401326 | 0.00017325 |

|              |          |                 |            |            |
|--------------|----------|-----------------|------------|------------|
| dhrsx        | DHRSX    | dehydrogena     | -5.6568287 | 4.62E-06   |
| dlg1         | DLG1     | discs, large ho | -3.981688  | 0.00176951 |
| LOC101464331 | DMBX1    | diencephalon    | -3.4521734 | 0.00622985 |
| dnaaf2       | DNAAF2   | dynein, axone   | -6.4723293 | 1.18E-07   |
| dnai2        | DNAI2    | dynein, axone   | -3.6604809 | 0.00294876 |
| LOC101476475 | DNAJC3   | DnaJ (Hsp40)    | -3.5537105 | 0.00307518 |
| dnajc6       | DNAJC6   | DnaJ (Hsp40)    | -5.1848399 | 3.73E-05   |
| LOC101485654 | DNASE1L1 | deoxyribonuc    | -6.7177023 | 4.03E-06   |
| LOC101485000 | DNASE1L1 | deoxyribonuc    | -5.4078231 | 5.52E-05   |
| LOC101477732 | DNASE1L1 | deoxyribonuc    | -5.0995066 | 4.27E-05   |
| dnase1l3     | DNASE1L1 | deoxyribonuc    | -4.6967824 | 0.00010628 |
| LOC101473965 | DNMT3L   | DNA (cytosine   | -2.7555949 | 0.00980269 |
| dohh         | DOHH     | deoxyhypusir    | -3.5510036 | 0.00365556 |
| LOC101468029 | DOK1     | docking prote   | -6.6989199 | 1.70E-07   |
| dqx1         | DQX1     | DEAQ box RN     | -3.9378033 | 0.00052147 |
| LOC101475702 | DSC1     | desmocollin 1   | -8.1339888 | 4.69E-09   |
| LOC101482365 | DSC1     | desmocollin 1   | -5.6341599 | 5.31E-07   |
| LOC105940471 | DSC1     | desmocollin 1   | -5.2142395 | 5.44E-06   |
| LOC101473374 | DSC1     | desmocollin 1   | -4.8142271 | 0.00019621 |
| LOC101474133 | DSC1     | desmocollin 1   | -4.3218758 | 0.00013752 |
| dsel         | DSEL     | dermatan sul    | -4.4204683 | 0.00052267 |
| LOC101474660 | DSP      | desmoplakin     | -6.6885252 | 2.79E-09   |
| LOC101468104 | DUSP10   | dual specificit | -3.2991885 | 0.00675551 |
| dusp12       | DUSP12   | dual specificit | -2.8608717 | 0.00708726 |
| LOC101468287 | DUSP14   | dual specificit | -3.4982413 | 0.00085466 |
| dusp7        | DUSP7    | dual specificit | -6.2004759 | 2.96E-09   |
| LOC101486034 | E2F5     | E2F transcript  | -7.849987  | 3.06E-09   |
| LOC101482309 | EEF1A2   | eukaryotic tra  | -2.1624451 | 0.01052799 |
| eef1e1       | EEF1E1   | eukaryotic tra  | -3.4803479 | 0.00519991 |
| efcab14      | EFCAB14  | EF-hand calci   | -1.9962493 | 0.01033052 |
| eftud1       | EFTUD1   | elongation fa   | -3.908096  | 0.00143667 |
| LOC101477281 | EGFR     | epidermal gro   | -3.301889  | 0.01067002 |
| LOC101482048 | EGR3     | early growth    | -3.4794101 | 0.00838626 |
| eif1ad       | EIF1AD   | eukaryotic tra  | -7.5316933 | 1.43E-07   |
| eif2ak1      | EIF2AK1  | eukaryotic tra  | -2.4123666 | 0.00057563 |
| eif2b4       | EIF2B4   | eukaryotic tra  | -3.7569963 | 0.00183117 |
| LOC101480970 | EIF4E1B  | eukaryotic tra  | -3.2063374 | 0.00493933 |
| LOC101474559 | ELF3     | E74-like facto  | -6.3036768 | 1.60E-06   |
| LOC101472138 | ELL      | elongation fa   | -3.7790512 | 0.00023485 |
| elmsan1      | ELMSAN1  | ELM2 and My     | -5.429201  | 6.76E-05   |
| LOC101481208 | ELOVL1   | ELOVL fatty a   | -3.9959527 | 0.00071481 |



|              |          |                 |            |            |
|--------------|----------|-----------------|------------|------------|
| elovl7       | ELOVL7   | ELOVL fatty a   | -6.5850224 | 2.15E-06   |
| emc9         | EMC9     | ER membran      | -4.1770135 | 1.06E-07   |
| LOC101482971 | EMP1     | epithelial me   | -2.4163348 | 0.00650671 |
| LOC101471457 | EMP3     | epithelial me   | -3.3187131 | 0.00399931 |
| LOC101471758 | ENDOD1   | endonucleas     | -6.2933206 | 4.78E-08   |
| LOC101477672 | ENTPD2   | ectonucleosic   | -3.7139869 | 0.00069768 |
| LOC101473382 | ENTPD3   | ectonucleosic   | -7.3114196 | 3.52E-07   |
| LOC101479109 | EPB41L1  | erythrocyte n   | -7.2242223 | 9.61E-08   |
| epb41l4b     | EPB41L4B | erythrocyte n   | -7.534323  | 3.53E-08   |
| LOC101475160 | EPB42    | erythrocyte n   | -8.4404576 | 4.75E-08   |
| LOC101483349 | EPB42    | erythrocyte n   | -7.4845409 | 5.34E-08   |
| LOC101483944 | EPB42    | erythrocyte n   | -7.1945491 | 9.00E-07   |
| LOC101476154 | EPCAM    | epithelial cell | -5.4149425 | 2.87E-05   |
| LOC106675788 | EPM2AIP1 | EPM2A (lafor    | -3.9313874 | 0.00090703 |
| LOC106674795 | EPM2AIP1 | EPM2A (lafor    | -3.3279767 | 0.00233418 |
| eps8l1       | EPS8L1   | EPS8-like 1 [S  | -7.6452618 | 1.51E-09   |
| eps8l2       | EPS8L2   | EPS8-like 2 [S  | -6.0594756 | 2.56E-06   |
| erbb2        | ERBB2    | v-erb-b2 eryt   | -4.5055909 | 0.00042559 |
| erbb3        | ERBB3    | v-erb-b2 eryt   | -6.5904829 | 7.09E-06   |
| ergic3       | ERGIC3   | ERGIC and go    | -2.3911406 | 3.17E-05   |
| LOC101468631 | ERLIN2   | ER lipid raft a | -4.8507547 | 0.00013246 |
| LOC101475569 | ERN1     | endoplasmic     | -2.7498986 | 0.00757498 |
| LOC101469072 | ESR2     | estrogen rece   | -4.6524552 | 5.98E-05   |
| esrp1        | ESRP1    | epithelial spli | -7.0919951 | 1.98E-08   |
| LOC101470769 | EVA1C    | eva-1 homolc    | -3.3078187 | 0.00513895 |
| LOC101470648 | EVPL     | envoplakin [S   | -9.1034874 | 5.53E-10   |
| evpl         | EVPL     | envoplakin [S   | -8.4231011 | 3.10E-10   |
| LOC101486492 | EXTL1    | exostoses (m    | -3.3756764 | 0.00353466 |
| ezr          | EZR      | ezrin [Source   | -5.5337802 | 8.76E-06   |
| fa2h         | FA2H     | fatty acid 2-h  | -3.5891636 | 0.00836317 |
| LOC101485489 | FABP6    | fatty acid bin  | -5.5204504 | 2.25E-05   |
| LOC101484077 | FAM102A  | family with se  | -7.5611006 | 2.57E-08   |
| fam103a1     | FAM103A1 | family with se  | -7.9118428 | 1.15E-10   |
| LOC101474680 | FAM105B  | family with se  | -3.2883598 | 3.86E-05   |
| LOC101481643 | FAM109A  | family with se  | -2.7517403 | 0.00701694 |
| fam117a      | FAM117A  | family with se  | -3.2295865 | 0.00338887 |
| LOC101484850 | FAM129A  | family with se  | -3.9013101 | 0.0011208  |
| fam160b1     | FAM160B1 | family with se  | -3.5001063 | 1.86E-05   |
| fam183a      | FAM183A  | family with se  | -1.8539274 | 0.00121469 |
| fam189a1     | FAM189A1 | family with se  | -3.023633  | 0.0077034  |
| fam195a      | FAM195A  | family with se  | -3.3214956 | 0.00216118 |

|              |         |                |            |            |
|--------------|---------|----------------|------------|------------|
| LOC101479720 | FAM196A | family with se | -5.3717733 | 1.78E-05   |
| fam210b      | FAM210B | family with se | -6.9999113 | 4.94E-08   |
| LOC101488081 | FAM212A | family with se | -3.2763993 | 0.00221231 |
| fam35a       | FAM35A  | family with se | -4.227314  | 9.58E-11   |
| LOC101465551 | FAM49B  | family with se | -3.1874837 | 0.00222942 |
| fam53b       | FAM53B  | family with se | -4.877608  | 2.50E-06   |
| LOC101487817 | FAM65C  | family with se | -4.5191872 | 0.00010598 |
| LOC101468946 | FAM69A  | family with se | -3.3644636 | 0.00367688 |
| fam83b       | FAM83B  | family with se | -6.2604902 | 2.04E-06   |
| LOC101475864 | FAM83F  | family with se | -5.6970247 | 2.94E-05   |
| LOC101487448 | FAM83F  | family with se | -3.1250473 | 0.00677356 |
| fam83g       | FAM83G  | family with se | -2.958995  | 0.00549788 |
| fam83h       | FAM83H  | family with se | -4.2416972 | 3.78E-06   |
| fanca        | FANCA   | Fanconi anem   | -3.261683  | 0.00617854 |
| fancl        | FANCL   | Fanconi anem   | -1.891095  | 0.00158807 |
| fancm        | FANCM   | Fanconi anem   | -1.6107358 | 0.00793076 |
| LOC101473631 | FARP1   | FERM, RhoGE    | -2.4258258 | 0.01151289 |
| farp2        | FARP2   | FERM, RhoGE    | -4.0745511 | 1.80E-05   |
| farsb        | FARSB   | phenylalanyl-  | -3.9628338 | 0.00368196 |
| fastk        | FASTK   | Fas-activated  | -4.8843687 | 0.00026092 |
| LOC101485697 | FASTKD3 | FAST kinase d  | -3.1531803 | 0.00886611 |
| fbf1         | FBF1    | Fas (TNFRSF6   | -1.8140519 | 0.00519546 |
| LOC101463775 | FBXL3   | F-box and leu  | -3.4090518 | 0.00301842 |
| fbxl6        | FBXL6   | F-box and leu  | -8.0849837 | 2.73E-16   |
| fbxo34       | FBXO34  | F-box protein  | -2.7302834 | 0.00835471 |
| LOC101486413 | FCRLA   | Fc receptor-li | -3.3552394 | 0.00396057 |
| LOC101484479 | FCRLA   | Fc receptor-li | -2.9503317 | 0.00903929 |
| fgd4         | FGD4    | FYVE, RhoGEF   | -4.0342815 | 0.00135873 |
| LOC101478795 | FHDC1   | FH2 domain c   | -4.5170275 | 0.00046882 |
| LOC101485431 | FKBP5   | FK506 binding  | -3.2424882 | 0.00339338 |
| LOC101472007 | FNDC7   | fibronectin ty | -2.8112861 | 0.00677663 |
| fndc9        | FNDC9   | fibronectin ty | -1.984634  | 0.0002089  |
| LOC101487312 | FOS     | FBJ murine os  | -3.153837  | 0.01142601 |
| LOC101467033 | FOS     | FBJ murine os  | -2.7473855 | 0.00999749 |
| LOC101486283 | FOXB1   | forkhead box   | -3.5324797 | 0.00704142 |
| foxc1        | FOXC2   | forkhead box   | -4.041945  | 8.09E-05   |
| frmd1        | FRMD1   | FERM domair    | -3.7562852 | 0.00356324 |
| LOC101475124 | FRMD4B  | FERM domair    | -4.9580673 | 4.45E-05   |
| fsd1         | FSD1    | fibronectin ty | -7.1518533 | 5.84E-08   |
| fut11        | FUT11   | fucosyltransfe | -9.8474807 | 6.37E-13   |
| LOC101487668 | FYB     | FYN binding p  | -7.9915385 | 5.71E-09   |

|              |            |                |            |            |
|--------------|------------|----------------|------------|------------|
| fyn          | FYN        | FYN oncogen    | -3.9148123 | 0.00016687 |
| g3bp1        | G3BP1      | GTPase activa  | -3.7374292 | 0.00147982 |
| gabpa        | GABPA      | GA binding pr  | -1.8649745 | 0.00435305 |
| gabpb2       | GABPB2     | GA binding pr  | -3.6914141 | 5.92E-06   |
| LOC101473770 | GAD1       | glutamate de   | -8.437895  | 7.13E-10   |
| gadd45gip1   | GADD45GIP1 | growth arrest  | -4.2280295 | 2.88E-05   |
| galk2        | GALK2      | galactokinase  | -6.2269595 | 4.00E-06   |
| galnt14      | GALNT14    | UDP-N-acetyl   | -3.4357011 | 0.00408781 |
| LOC105941306 | GALNT8     | UDP-N-acetyl   | -5.7656101 | 5.00E-06   |
| LOC101472906 | GARS       | glycyl-tRNA s  | -4.5098196 | 0.00027999 |
| gart         | GART       | phosphoribos   | -3.1871345 | 0.00012182 |
| LOC101463747 | GCK        | glucokinase (l | -3.5519207 | 0.004048   |
| gcsh         | GCSH       | glycine cleava | -7.0745159 | 1.63E-07   |
| gda          | GDA        | guanine deam   | -7.2984303 | 1.92E-08   |
| LOC101473896 | GGH        | gamma-gluta    | -3.2838223 | 0.00411762 |
| LOC101464917 | GHR        | growth horm    | -4.8687586 | 3.02E-05   |
| gid4         | GID4       | GID complex    | -7.687916  | 4.41E-09   |
| LOC101470772 | GIMAP4     | GTPase, IMAF   | -7.4365881 | 5.07E-09   |
| LOC101483954 | GIMAP4     | GTPase, IMAF   | -6.2601368 | 1.96E-06   |
| LOC101472830 | GIMAP4     | GTPase, IMAF   | -5.7575036 | 2.25E-05   |
| LOC101473823 | GIMAP4     | GTPase, IMAF   | -5.5324126 | 1.26E-06   |
| LOC101482531 | GIMAP4     | GTPase, IMAF   | -4.8654703 | 8.41E-06   |
| LOC101480026 | GIMAP4     | GTPase, IMAF   | -4.6076209 | 0.00014285 |
| LOC101482533 | GIMAP4     | GTPase, IMAF   | -4.116847  | 0.00024714 |
| LOC101465760 | GIMAP4     | GTPase, IMAF   | -4.0784497 | 0.00019207 |
| LOC101468011 | GIMAP4     | GTPase, IMAF   | -3.9583712 | 0.00072224 |
| LOC105940615 | GIMAP4     | GTPase, IMAF   | -3.9410316 | 0.00016152 |
| LOC106674495 | GIMAP4     | GTPase, IMAF   | -3.6614021 | 0.00049174 |
| LOC101473531 | GIMAP4     | GTPase, IMAF   | -3.6584855 | 0.00037187 |
| LOC101473159 | GIMAP4     | GTPase, IMAF   | -3.5495212 | 0.00140441 |
| LOC101479274 | GIMAP4     | GTPase, IMAF   | -3.4716269 | 0.0012606  |
| LOC101470849 | GIMAP4     | GTPase, IMAF   | -3.1446659 | 0.00376277 |
| LOC106676236 | GIMAP4     | GTPase, IMAF   | -3.0293915 | 0.00784797 |
| LOC101488130 | GIMAP4     | GTPase, IMAF   | -2.8704899 | 0.00423681 |
| LOC101466893 | GIMAP4     | GTPase, IMAF   | -2.4178457 | 0.01020335 |
| LOC101486160 | GJA3       | gap junction   | -3.0275479 | 0.0076366  |
| LOC101469892 | GJB3       | gap junction   | -4.5911373 | 0.00015591 |
| LOC101471331 | GJB5       | gap junction   | -4.4431741 | 0.00013001 |
| gldc         | GLDC       | glycine dehy   | -5.9136584 | 6.77E-06   |
| glra2        | GLRA2      | glycine recep  | -5.0133417 | 2.77E-05   |
| glud1        | GLUD1      | glutamate de   | -2.7369656 | 0.00254095 |

|              |          |                 |            |            |
|--------------|----------|-----------------|------------|------------|
| LOC101478711 | GLUL     | glutamate-an    | -8.4682452 | 1.10E-10   |
| gmds         | GMDS     | GDP-mannos      | -8.7148657 | 3.38E-10   |
| gmfb         | GMFB     | glia maturati   | -3.153638  | 0.00055436 |
| LOC106676909 | GNA14    | guanine nucle   | -2.7161041 | 0.00283859 |
| LOC101483250 | GNAO1    | guanine nucle   | -2.8396565 | 0.01117833 |
| gne          | GNE      | glucosamine     | -8.1081853 | 3.31E-11   |
| golp3        | GOLPH3   | golgi phospho   | -3.6697178 | 2.29E-05   |
| gorasp2      | GORASP2  | golgi reassem   | -3.9517403 | 0.00109125 |
| LOC101478913 | GPA33    | glycoprotein    | -3.2965711 | 0.00344638 |
| LOC101469872 | GPC5     | glypican 5 [Sc  | -3.6163612 | 0.00259953 |
| LOC101473153 | GPD1     | glycerol-3-ph   | -7.6501924 | 1.57E-07   |
| gpr101       | GPR101   | G protein-cou   | -3.2897955 | 0.00802002 |
| gpr157       | GPR157   | G protein-cou   | -4.1408976 | 0.00312851 |
| LOC101469645 | GPR31    | G protein-cou   | -3.1953585 | 0.00302888 |
| LOC101479735 | GPR37    | G protein-cou   | -7.5773301 | 5.68E-08   |
| LOC101475391 | GPR64    | G protein-cou   | -3.1203786 | 0.0090886  |
| LOC101472374 | GPRC5D   | G protein-cou   | -7.9439221 | 4.02E-10   |
| LOC101486521 | GRAMD4   | GRAM domai      | -4.6111956 | 0.00021549 |
| LOC101472205 | GRB10    | growth factor   | -4.3158891 | 0.00013363 |
| LOC101469335 | GRB7     | growth factor   | -3.0202793 | 0.00533276 |
| grhl1        | GRHL1    | grainyhead-lil  | -6.8838713 | 1.92E-06   |
| LOC101473111 | GRHL2    | grainyhead-lil  | -4.03196   | 0.00060605 |
| grhl3        | GRHL3    | grainyhead-lil  | -6.4706772 | 1.14E-06   |
| LOC101474374 | GRIK2    | glutamate rec   | -4.4558553 | 0.0001975  |
| LOC101468307 | GRINA    | glutamate rec   | -3.6882075 | 0.00245163 |
| LOC101472812 | GRM2     | glutamate rec   | -5.0253581 | 6.35E-05   |
| grwd1        | GRWD1    | glutamate-ric   | -5.0266    | 8.24E-05   |
| gsg1         | GSG1     | germ cell asso  | -5.8946105 | 8.84E-05   |
| LOC101487342 | GSN      | gelsolin [Sour  | -5.039715  | 3.64E-07   |
| LOC101469101 | GSTA4    | glutathione S   | -2.4354319 | 0.01164577 |
| gtpbp6       | GTPBP6   | GTP binding p   | -8.0621125 | 4.99E-14   |
| hace1        | HACE1    | HECT domain     | -6.021049  | 1.65E-07   |
| LOC101486868 | HCFC1    | host cell facto | -5.0427062 | 3.37E-07   |
| heatr1       | HEATR1   | HEAT repeat     | -2.8620517 | 0.00919449 |
| hemk1        | HEMK1    | HemK methyl     | -4.9819779 | 2.00E-10   |
| LOC101478665 | HEPACAM2 | HEPACAM far     | -2.9206915 | 0.0090908  |
| LOC101464787 | HHLA2    | HERV-H LTR-α    | -6.1117269 | 1.15E-06   |
| LOC101465549 | HHLA2    | HERV-H LTR-α    | -5.4658187 | 0.00013565 |
| LOC101466245 | HHLA2    | HERV-H LTR-α    | -4.7771412 | 1.35E-05   |
| LOC101466873 | HIBADH   | 3-hydroxyisol   | -2.9326662 | 0.0054656  |
| hid1         | HID1     | HID1 domain     | -12.593126 | 1.05E-15   |

|              |           |                |            |            |
|--------------|-----------|----------------|------------|------------|
| LOC101487316 | HIP1R     | huntingtin int | -5.871711  | 3.18E-06   |
| LOC101486848 | HIP1R     | huntingtin int | -3.7915069 | 0.00192189 |
| LOC101467042 | HIST1H2BA | histone cluste | -2.8704899 | 0.00423681 |
| LOC106674701 | HIST2H2AC | histone cluste | -3.0852415 | 0.0023302  |
| LOC101478967 | HLA-DRA   | major histocc  | -3.6820496 | 0.00132586 |
| hlf          | HLF       | hepatic leuke  | -3.1650263 | 0.00540474 |
| hmgcl        | HMGCL     | 3-hydroxyme    | -5.6937839 | 7.68E-11   |
| hmgn1        | hmgn1     | high mobility  | -3.7017766 | 1.85E-06   |
| homer2       | HOMER2    | homer homo     | -8.5425191 | 7.64E-09   |
| homez        | HOMEZ     | homeobox ar    | -3.4595135 | 0.0020248  |
| hopx         | hopx      | HOP homeob     | -4.8233327 | 0.00021064 |
| hoxa13       | HOXA13    | homeobox A1    | -5.3888718 | 1.44E-05   |
| tmprss9      | HPN       | hepsin [Sourc  | -5.4307972 | 3.18E-05   |
| hsd17b12     | HSD17B12  | hydroxystero   | -5.1359357 | 2.99E-05   |
| LOC101482753 | HTRA2     | HtrA serine p  | -2.1344334 | 0.00212781 |
| iah1         | IAH1      | isoamyl aceta  | -6.6162134 | 2.44E-06   |
| LOC101487578 | IDH3G     | isocitrate def | -5.2603945 | 1.02E-05   |
| LOC101464712 | IFI27L2   | interferon, al | -3.1125917 | 0.00213349 |
| LOC101486260 | IFI30     | interferon, ga | -2.4734679 | 0.00035168 |
| LOC101478727 | IFIT5     | interferon-inc | -5.8974517 | 5.24E-06   |
| LOC101479007 | IFIT5     | interferon-inc | -4.9139084 | 0.00056725 |
| ift172       | IFT172    | intraflagellar | -8.5133815 | 2.13E-09   |
| ikzf2        | IKZF2     | IKAROS famil   | -5.0303415 | 2.18E-05   |
| ikzf5        | IKZF5     | IKAROS famil   | -9.5816904 | 2.07E-11   |
| LOC101479442 | IL10RB    | interleukin 10 | -3.4799494 | 0.00362556 |
| LOC101474421 | IL12RB2   | interleukin 12 | -3.8218819 | 0.00293692 |
| LOC101468842 | IL13RA1   | interleukin 13 | -4.6457017 | 4.62E-05   |
| LOC101482752 | IL13RA2   | interleukin 13 | -4.8562336 | 4.32E-05   |
| LOC101484732 | IL16      | interleukin 16 | -3.0683751 | 0.01177198 |
| il17d        | IL17D     | interleukin 17 | -4.6273545 | 2.28E-10   |
| LOC101463827 | IL20RA    | interleukin 20 | -2.8802157 | 0.00620225 |
| LOC105940966 | IL21      | interleukin 21 | -3.3092862 | 0.00955325 |
| LOC101478360 | ILDR1     | immunoglobu    | -3.5513988 | 0.00524142 |
| ino80e       | INO80E    | INO80 compl    | -4.1996082 | 0.00106015 |
| ipmk         | ipmk      | inositol polyp | -5.4274858 | 1.95E-05   |
| ipp          | IPP       | intracisternal | -5.4278318 | 8.62E-05   |
| LOC101475876 | IRF2BP1   | interferon reğ | -3.7141735 | 3.35E-06   |
| LOC101481996 | IRF2BP1   | interferon reğ | -2.6086833 | 0.01115286 |
| irf5         | IRF5      | interferon reğ | -4.1138675 | 0.0005932  |
| LOC101482705 | IRS2      | insulin recept | -3.6769118 | 0.00184859 |
| LOC101476715 | IRS4      | insulin recept | -3.8723812 | 0.0008655  |

|              |          |                   |            |            |
|--------------|----------|-------------------|------------|------------|
| LOC101482358 | ITGB1BP2 | integrin beta     | -5.9004519 | 5.44E-06   |
| itgb4        | ITGB4    | integrin, beta    | -4.0285154 | 0.00058802 |
| LOC101487045 | ITIH3    | inter-alpha-tr    | -3.5901146 | 0.00015943 |
| LOC101476763 | ITSN2    | intersectin 2     | -3.9300634 | 0.0003894  |
| ivns1abp     | IVNS1ABP | influenza viru    | -3.2846544 | 0.00197027 |
| iws1         | IWS1     | IWS1 homolo       | -4.325014  | 0.0001609  |
| jagn1        | JAGN1    | jagunal homc      | -9.2996936 | 4.53E-15   |
| jmjd8        | JMJD8    | jumonji doma      | -6.2374876 | 2.33E-07   |
| jph2         | JPH2     | junction philin 2 | -7.6704432 | 8.44E-09   |
| LOC101482945 | JUN      | jun proto-onc     | -3.3542557 | 0.00010936 |
| LOC101478427 | JUP      | junction plak     | -4.0341829 | 0.00016243 |
| anos1        | KAL1     | Kallmann syn      | -3.4545988 | 0.00394927 |
| LOC101478713 | KCNIP2   | Kv channel in     | -3.8250361 | 0.00106574 |
| spidr        | KIAA0146 | KIAA0146 [So      | -3.9189121 | 0.00063673 |
| kiaa0922     | KIAA0922 | KIAA0922 [So      | -3.40534   | 0.00156972 |
| kiaa1211     | KIAA1211 | KIAA1211 [So      | -6.4296467 | 1.57E-07   |
| cep126       | KIAA1377 | KIAA1377 [So      | -3.0218157 | 0.00875813 |
| kiaa2026     | kiaa2026 | kiaa2026          | -3.5559224 | 0.00244254 |
| LOC101482075 | KIF13B   | kinesin family    | -7.588249  | 2.16E-08   |
| LOC101472005 | KIF20B   | kinesin family    | -7.0360665 | 1.31E-07   |
| LOC101473285 | KIFC2    | kinesin family    | -3.7139869 | 0.00069768 |
| LOC101463985 | KISS1R   | KISS1 receptc     | -7.1686544 | 8.07E-08   |
| klb          | KLB      | klotho beta [S    | -4.0730282 | 0.00073083 |
| klf11        | KLF11    | Kruppel-like f    | -3.5051955 | 0.00162625 |
| klf2         | klf2     | Kruppel like f    | -4.3995681 | 3.17E-06   |
| klf3         | klf3     | Kruppel like f    | -4.0024731 | 0.00024131 |
| klf4         | klf4     | Kruppel like f    | -5.9466199 | 3.87E-06   |
| klf5         | klf5     | Kruppel like f    | -6.6986908 | 1.68E-06   |
| klf9         | KLF9     | Kruppel-like f    | -3.0917108 | 0.0074698  |
| klhl26       | klhl26   | kelch like fam    | -3.177801  | 0.00525302 |
| LOC101476845 | KLHL33   | kelch-like 33     | -3.3362749 | 0.00343305 |
| LOC101467686 | KNSTRN   | kinetochore-l     | -10.666691 | 4.73E-11   |
| LOC101476354 | KRT20    | keratin 20 [Sc    | -7.9659737 | 1.21E-07   |
| LOC101476651 | KRT23    | keratin 23 (hi    | -11.088085 | 4.87E-14   |
| LOC101470433 | KRT23    | keratin 23 (hi    | -11.016337 | 7.15E-11   |
| LOC101469858 | KRT23    | keratin 23 (hi    | -5.2585201 | 5.36E-05   |
| LOC101476066 | KRT23    | keratin 23 (hi    | -3.8527312 | 2.86E-06   |
| LOC101482554 | KRT23    | keratin 23 (hi    | -3.0799061 | 0.00799076 |
| LOC101485955 | KRT84    | keratin 84 [Sc    | -9.3743092 | 1.89E-15   |
| LOC101486263 | KRT84    | keratin 84 [Sc    | -3.4854467 | 3.76E-06   |
| LOC101484446 | KRTCAP3  | keratinocyte      | -4.0729995 | 0.00012223 |

|              |         |                 |            |            |
|--------------|---------|-----------------|------------|------------|
| lactb        | LACTB   | lactamase, be   | -8.9101404 | 1.77E-10   |
| LOC101470808 | LALBA   | lactalbumin, c  | -4.2477735 | 0.00131693 |
| LOC106675455 | LBH     | limb bud and    | -3.5064184 | 0.00560383 |
| lck          | LCK     | lymphocyte-s    | -4.4772772 | 0.00109551 |
| leng9        | LENG9   | leukocyte rec   | -3.7700561 | 0.0034326  |
| LOC101468553 | LGALS1  | lectin, galact  | -6.7518434 | 2.65E-08   |
| LOC101483893 | LGALS1  | lectin, galact  | -3.0941786 | 0.00576166 |
| LOC101473814 | LGI1    | leucine-rich, g | -4.1115564 | 0.0005526  |
| LOC101487540 | LGI2    | leucine-rich r  | -6.2429262 | 3.90E-06   |
| lhfp15       | LHFPL5  | lipoma HMGI     | -2.4287553 | 0.00249365 |
| lmo7         | LIMCH1  | LIM and calpo   | -4.6347697 | 7.06E-05   |
| LOC101465963 | LMLN    | leishmanolysi   | -11.299376 | 5.89E-14   |
| lmod3        | LMOD3   | leiomodoin 3 (  | -7.4400353 | 1.24E-06   |
| LOC101482740 | LMX1A   | LIM homeobc     | -2.9674833 | 0.00636337 |
| lnx1         | LNX1    | ligand of nurr  | -3.713701  | 0.00444307 |
| LOC101482875 | LPAR2   | lysophosphat    | -10.443933 | 3.90E-11   |
| lpcat4       | LPCAT4  | lysophosphat    | -3.8752786 | 0.00065333 |
| adgrl2       | LPHN2   | latrophilin 2 [ | -3.8798063 | 0.00025536 |
| LOC101476956 | LPO     | lactoperoxida   | -5.2749502 | 3.43E-06   |
| LOC101483596 | LPO     | lactoperoxida   | -3.9077703 | 0.00473246 |
| lrp2         | LRP2    | low density li  | -8.6152833 | 1.09E-10   |
| lrr1         | LRR1    | leucine rich r  | -3.6287775 | 0.001658   |
| lrrc1        | LRRC1   | leucine rich r  | -4.5300733 | 0.00012398 |
| gp1bb        | LRRC70  | leucine rich r  | -6.6277762 | 9.01E-08   |
| LOC101466630 | LRRFIP1 | leucine rich r  | -3.704723  | 0.00115207 |
| lrrfip2      | LRRFIP2 | leucine rich r  | -2.3661826 | 0.01112824 |
| LOC101477090 | LSM14B  | LSM14B, SCD     | -11.167697 | 7.20E-16   |
| lsm5         | LSM5    | LSM5 homolc     | -4.071884  | 0.00124827 |
| LOC101476279 | LTB4R   | leukotriene B   | -5.5196899 | 5.96E-06   |
| LOC101476568 | LTB4R   | leukotriene B   | -5.1415494 | 3.11E-05   |
| ltk          | LTK     | leukocyte rec   | -4.3361061 | 0.00064502 |
| luc7l        | LUC7L   | LUC7-like (S. c | -3.1026399 | 0.00078012 |
| luc7l3       | LUC7L3  | LUC7-like 3 (S  | -2.2650983 | 0.00938011 |
| lxn          | LXN     | latexin [Sourc  | -3.9180316 | 5.80E-06   |
| LOC101464585 | LYRM5   | LYR motif cor   | -4.7350796 | 1.69E-05   |
| lzic         | LZIC    | leucine zippe   | -9.508351  | 7.38E-11   |
| mad2l2       | MAD2L2  | MAD2 mitotic    | -3.4630134 | 4.13E-05   |
| LOC105941358 | MAG     | myelin associ   | -5.2931891 | 8.00E-06   |
| LOC106674858 | MAG     | myelin associ   | -2.4559759 | 0.01170833 |
| LOC101472626 | MAGI3   | membrane as     | -4.6887473 | 0.00012644 |
| LOC101485761 | MAL     | mal, T-cell dif | -7.6523223 | 6.60E-08   |

|              |         |                |            |            |
|--------------|---------|----------------|------------|------------|
| maneal       | MANEAL  | mannosidase    | -6.7218903 | 1.07E-07   |
| map3k12      | MAP3K12 | mitogen-activ  | -3.9828293 | 0.00024023 |
| map3k15      | MAP3K15 | mitogen-activ  | -6.8274319 | 8.14E-08   |
| map3k19      | MAP3K19 | mitogen-activ  | -3.0474177 | 0.01035321 |
| LOC101472584 | MAP7    | microtubule-i  | -4.4354976 | 0.00056453 |
| map7         | MAP7    | microtubule-i  | -3.8694265 | 0.00314293 |
| LOC101485680 | MAPK12  | mitogen-activ  | -3.6470457 | 0.00127191 |
| March1       | March1  | membrane as    | -2.3946302 | 0.00877006 |
| mau2         | MAU2    | MAU2 chrom     | -6.2495623 | 1.32E-08   |
| mcmdc2       | MCMDC2  | minichromos    | -2.0307341 | 0.00234669 |
| LOC101476817 | MCTP2   | multiple C2 d  | -3.7829429 | 0.00035227 |
| med19        | MED19   | mediator con   | -4.096925  | 0.00106089 |
| LOC101487076 | MEP1B   | mepirin A, bel | -3.5228488 | 0.00062382 |
| mettl23      | METTL23 | methyltransfe  | -5.0096232 | 0.00017559 |
| mex3a        | MEX3A   | mex-3 homol    | -6.432818  | 3.32E-07   |
| mfap3        | MFAP3   | microfibrillar | -5.5578621 | 1.51E-06   |
| mgarp        | mgarp   | mitochondria   | -2.6720958 | 0.01109797 |
| mgat4d       | mgat4d  | Glycosyltrans  | -3.3599147 | 0.00096896 |
| LOC101474131 | MGST2   | microsomal g   | -4.897837  | 2.26E-05   |
| LOC101468163 | MICAL2  | microtubule a  | -4.7967434 | 4.55E-05   |
| mid1ip1      | MID1IP1 | MID1 interacti | -7.4284553 | 9.32E-08   |
| mlh1         | mlh1    | mutL homolo    | -3.7035848 | 3.84E-07   |
| LOC101477882 | MLLT4   | myeloid/lymph  | -5.8088306 | 3.41E-10   |
| LOC101468688 | MMP25   | matrix metall  | -6.041322  | 1.66E-05   |
| mn1          | MN1     | meningioma     | -7.3901531 | 3.74E-07   |
| LOC101484727 | MOGAT3  | monoacylglyc   | -3.4007695 | 0.00242749 |
| LOC101476831 | MOV10   | Mov10, Molo    | -2.9450077 | 0.00494656 |
| mrpl18       | MRPL18  | mitochondria   | -3.2245785 | 0.01055384 |
| mrpl34       | MRPL34  | mitochondria   | -3.6325547 | 0.00200517 |
| mrpl48       | MRPL48  | mitochondria   | -7.8734826 | 3.79E-08   |
| mrps26       | MRPS26  | mitochondria   | -4.8011055 | 0.00011256 |
| LOC101485729 | MSLNL   | mesothelin-li  | -10.339063 | 5.47E-12   |
| msra         | MSRA    | methionine s   | -2.8249457 | 0.00235719 |
| mtfr2        | MTFR2   | mitochondria   | -8.9102871 | 1.29E-09   |
| mthfd1l      | MTHFD1L | methylenetet   | -4.017799  | 0.00036696 |
| mtif2        | mtif2   | mitochondria   | -1.7049036 | 0.00712045 |
| mtus2        | MTUS2   | microtubule a  | -4.6256818 | 0.00115416 |
| muc15        | muc15   | mucin 15, cel  | -4.1796847 | 0.00129281 |
| mus81        | MUS81   | MUS81 endo     | -2.6855038 | 0.00233007 |
| mvp          | MVP     | major vault p  | -5.745741  | 3.03E-07   |
| mxd3         | MXD3    | MAX dimeriza   | -2.914579  | 0.00700778 |



|              |        |                |            |            |
|--------------|--------|----------------|------------|------------|
| myb          | MYB    | v-myb myelol   | -5.8317072 | 2.06E-05   |
| LOC101482181 | MYCL1  | v-myc myeloc   | -6.2639855 | 2.95E-06   |
| LOC101483420 | MYH14  | myosin, heav   | -6.6794662 | 7.82E-08   |
| LOC101463895 | MYH6   | myosin, heav   | -5.0810475 | 5.37E-05   |
| mylip        | MYLIP  | myosin regul   | -3.3316233 | 0.00406084 |
| LOC101467201 | MYO1F  | myosin IF [So  | -6.8088836 | 1.14E-07   |
| LOC101483740 | MYO7B  | myosin VIIB [: | -3.8055048 | 0.00198009 |
| LOC101468518 | MYOF   | myoferlin [So  | -3.0489779 | 0.00458538 |
| n6amt2       | N6AMT2 | N-6 adenine-:  | -5.0482348 | 0.00070341 |
| LOC105941146 | NA     | NA             | -14.91037  | 1.60E-23   |
| LOC101465166 | NA     | NA             | -11.285102 | 3.44E-14   |
| LOC106676866 | NA     | NA             | -11.089572 | 8.98E-12   |
| LOC106676634 | NA     | NA             | -10.928253 | 4.37E-11   |
| LOC106676726 | NA     | NA             | -10.607421 | 1.32E-12   |
| LOC105940995 | NA     | NA             | -10.56777  | 4.24E-19   |
| LOC105941327 | NA     | NA             | -10.262655 | 1.62E-11   |
| LOC101483274 | NA     | NA             | -9.4491836 | 4.59E-12   |
| LOC101471434 | NA     | NA             | -9.3934878 | 5.97E-11   |
| LOC101476142 | NA     | NA             | -9.1658966 | 9.78E-12   |
| LOC101481752 | NA     | NA             | -8.8429471 | 1.85E-10   |
| LOC105940928 | NA     | NA             | -8.7606967 | 1.37E-09   |
| LOC106676502 | NA     | NA             | -8.3705279 | 8.05E-14   |
| LOC106676560 | NA     | NA             | -8.0667379 | 2.19E-08   |
| LOC101480360 | NA     | NA             | -8.0380905 | 2.82E-11   |
| LOC101471234 | NA     | NA             | -7.8418426 | 1.53E-09   |
| LOC101486921 | NA     | NA             | -7.356798  | 3.77E-12   |
| LOC105941180 | NA     | NA             | -7.1894267 | 4.44E-07   |
| LOC105940828 | NA     | NA             | -6.7026732 | 5.91E-06   |
| LOC105941329 | NA     | NA             | -6.6991258 | 4.33E-07   |
| LOC101469948 | NA     | NA             | -6.4278291 | 8.04E-07   |
| LOC101467316 | NA     | NA             | -6.384163  | 1.51E-06   |
| LOC105941187 | NA     | NA             | -6.3642488 | 2.76E-07   |
| LOC105940852 | NA     | NA             | -6.3533697 | 5.82E-10   |
| LOC105940775 | NA     | NA             | -6.3344129 | 4.81E-06   |
| LOC106676691 | NA     | NA             | -6.0942592 | 2.76E-09   |
| LOC101472574 | NA     | NA             | -6.0260992 | 8.44E-06   |
| LOC101463914 | NA     | NA             | -5.9679485 | 4.89E-06   |
| LOC101471754 | NA     | NA             | -4.725091  | 0.00014836 |
| LOC101463818 | NA     | NA             | -4.6704533 | 0.00024922 |
| LOC101481827 | NA     | NA             | -4.666776  | 0.00012147 |
| LOC101476414 | NA     | NA             | -4.6365112 | 8.00E-05   |

|              |    |    |            |            |
|--------------|----|----|------------|------------|
| LOC106676724 | NA | NA | -4.6355485 | 0.00084508 |
| LOC105940569 | NA | NA | -4.6161143 | 7.35E-05   |
| LOC106675221 | NA | NA | -4.5009968 | 1.83E-06   |
| LOC105941438 | NA | NA | -4.4679115 | 7.93E-05   |
| LOC106676072 | NA | NA | -4.4657723 | 0.00019939 |
| LOC101465749 | NA | NA | -4.3386247 | 0.00013152 |
| LOC106675389 | NA | NA | -4.3036435 | 3.92E-05   |
| LOC101484336 | NA | NA | -4.2833386 | 0.00062719 |
| LOC101484615 | NA | NA | -4.2663832 | 0.00033105 |
| LOC106676418 | NA | NA | -4.244444  | 0.00019259 |
| LOC105940766 | NA | NA | -4.2133134 | 0.000229   |
| LOC105941183 | NA | NA | -4.1699794 | 0.00185835 |
| LOC106676455 | NA | NA | -4.0128885 | 0.00307483 |
| LOC105940670 | NA | NA | -4.001723  | 0.00086222 |
| LOC101471044 | NA | NA | -3.8598635 | 0.00185728 |
| LOC105940988 | NA | NA | -3.8349571 | 0.00524739 |
| LOC106674675 | NA | NA | -3.8318379 | 0.00207632 |
| LOC106675740 | NA | NA | -3.8277201 | 0.00158162 |
| LOC106675500 | NA | NA | -3.7443183 | 0.01158749 |
| LOC105941043 | NA | NA | -3.6657059 | 2.03E-05   |
| LOC106675982 | NA | NA | -3.6470457 | 0.00127191 |
| LOC106675760 | NA | NA | -3.6014889 | 0.00230971 |
| LOC101465353 | NA | NA | -3.4774562 | 0.00924417 |
| LOC105940736 | NA | NA | -3.3981061 | 3.67E-05   |
| LOC106676504 | NA | NA | -3.3490248 | 0.00852026 |
| LOC101466287 | NA | NA | -3.2765919 | 0.00467679 |
| LOC106675074 | NA | NA | -3.2592273 | 0.00178023 |
| LOC106675439 | NA | NA | -3.1932654 | 0.00402191 |
| LOC101467309 | NA | NA | -3.1694126 | 0.00782878 |
| LOC101465469 | NA | NA | -3.1076689 | 0.00243309 |
| LOC105941398 | NA | NA | -3.0805691 | 0.00678316 |
| trnaq-cug    | NA | NA | -3.0571773 | 0.00763076 |
| LOC105940487 | NA | NA | -3.0340999 | 0.00956643 |
| LOC101471363 | NA | NA | -3.0104346 | 0.00391114 |
| LOC101475840 | NA | NA | -2.9455279 | 0.00653347 |
| LOC106676212 | NA | NA | -2.9279605 | 0.00806884 |
| LOC105940909 | NA | NA | -2.8859001 | 0.00334499 |
| LOC106674545 | NA | NA | -2.8704899 | 0.00423681 |
| LOC101486953 | NA | NA | -2.8701668 | 0.0046371  |
| LOC106676853 | NA | NA | -2.8659325 | 0.00452743 |
| LOC105940516 | NA | NA | -2.8621532 | 0.00398792 |

|              |              |                 |            |            |
|--------------|--------------|-----------------|------------|------------|
| LOC106675570 | NA           | NA              | -2.8476975 | 0.01049433 |
| LOC105941364 | NA           | NA              | -2.6219823 | 2.95E-05   |
| LOC105940488 | NA           | NA              | -2.5826593 | 0.00518665 |
| LOC105941032 | NA           | NA              | -2.5523924 | 0.01105173 |
| LOC106675615 | NA           | NA              | -2.5207361 | 0.0117835  |
| LOC101486729 | NA           | NA              | -2.4559759 | 0.01170833 |
| LOC106675110 | NA           | NA              | -2.2843628 | 0.0001572  |
| LOC105941293 | NA           | NA              | -2.0660492 | 0.0064575  |
| naif1        | NAIF1        | nuclear apop    | -5.3102397 | 2.47E-05   |
| LOC101475375 | NAPSA        | napsin A asp    | -4.1496533 | 0.00063597 |
| nars         | NARS         | asparaginytl    | -3.6893315 | 0.00454474 |
| LOC101483112 | NCALD        | neurocalcin d   | -5.7069264 | 8.86E-06   |
| LOC101468786 | NCAM1        | neural cell ad  | -3.4466089 | 0.00051164 |
| ncaph2       | NCAPH2       | non-SMC con     | -2.4880291 | 0.00081192 |
| LOC101483930 | NCL          | nucleolin [So   | -2.695576  | 0.00283814 |
| ndufa6       | NDUFA6       | NADH dehydr     | -3.020835  | 0.00045224 |
| ndufaf2      | NDUFAF2      | NADH dehydr     | -3.9753054 | 0.00110095 |
| LOC101485676 | NDUFV1       | NADH dehydr     | -2.4662977 | 0.00305875 |
| ndufv2       | NDUFV2       | NADH dehydr     | -2.2692951 | 0.00218693 |
| LOC101472925 | NEFM         | neurofilamen    | -2.6507257 | 0.00268603 |
| nek3         | NEK3         | NIMA-related    | -4.704909  | 0.00013281 |
| neu4         | NEU4         | sialidase 4 [Sc | -3.4774905 | 0.00836791 |
| neurl4       | NEURL2       | neuralized hc   | -2.5265336 | 0.00827647 |
| nfatc2ip     | NFATC2IP     | nuclear facto   | -3.7401818 | 0.00078432 |
| LOC101471350 | NFE2L1       | nuclear facto   | -4.9408267 | 0.00010148 |
| nfkbil1      | NFKBIL1      | nuclear facto   | -2.5224947 | 0.01132294 |
| LOC101467620 | NFKBIZ       | nuclear facto   | -4.0401763 | 0.0001218  |
| nfrkb        | NFRKB        | nuclear facto   | -9.9912892 | 2.21E-11   |
| LOC101479895 | NFX1         | nuclear trans   | -3.5134508 | 0.0031334  |
| nip7         | NIP7         | nuclear impo    | -2.5187254 | 0.00073386 |
| nipa1        | NIPA1        | non imprinte    | -5.8850253 | 5.26E-06   |
| nipal4       | NIPA2        | non imprinte    | -3.988692  | 0.00064525 |
| nit2         | NIT2         | nitrilase fami  | -9.1425942 | 3.89E-11   |
| LOC101478757 | NKX2-3       | NK2 homeob      | -4.0230276 | 0.00062676 |
| LOC101483765 | NME4         | NME/NM23 r      | -15.291179 | 4.21E-19   |
| nmnat1       | NMNAT1       | nicotinamide    | -8.0194866 | 4.27E-09   |
| LOC101472624 | NMRK1        | nicotinamide    | -5.5115867 | 2.78E-05   |
| LOC105941157 | NoAnnotation | NoAnnotatio     | -18.365275 | 1.24E-19   |
| LOC105940576 | NoAnnotation | NoAnnotatio     | -16.609699 | 8.43E-19   |
| LOC106674558 | NoAnnotation | NoAnnotatio     | -13.131336 | 5.96E-15   |
| LOC101474267 | NoAnnotation | NoAnnotatio     | -13.004463 | 3.17E-16   |

|              |              |              |            |            |
|--------------|--------------|--------------|------------|------------|
| LOC101466847 | NoAnnotation | NoAnnotation | -12.502949 | 6.47E-13   |
| LOC105940575 | NoAnnotation | NoAnnotation | -12.084649 | 2.32E-13   |
| LOC101475848 | NoAnnotation | NoAnnotation | -12.00536  | 2.49E-14   |
| LOC101473175 | NoAnnotation | NoAnnotation | -11.482494 | 1.23E-14   |
| LOC106676574 | NoAnnotation | NoAnnotation | -11.32839  | 1.14E-14   |
| LOC101472879 | NoAnnotation | NoAnnotation | -10.845746 | 6.58E-14   |
| LOC106675996 | NoAnnotation | NoAnnotation | -10.43531  | 1.04E-12   |
| LOC106676246 | NoAnnotation | NoAnnotation | -10.093978 | 4.92E-13   |
| LOC106676062 | NoAnnotation | NoAnnotation | -10.013895 | 1.52E-10   |
| LOC101478955 | NoAnnotation | NoAnnotation | -9.51117   | 1.34E-11   |
| LOC105941246 | NoAnnotation | NoAnnotation | -9.4525578 | 6.53E-12   |
| LOC101468230 | NoAnnotation | NoAnnotation | -9.3143199 | 2.75E-08   |
| LOC101479207 | NoAnnotation | NoAnnotation | -8.8873697 | 1.20E-10   |
| LOC106674716 | NoAnnotation | NoAnnotation | -8.0621258 | 2.83E-08   |
| LOC101465183 | NoAnnotation | NoAnnotation | -7.8708406 | 1.42E-07   |
| LOC101463608 | NoAnnotation | NoAnnotation | -7.5464664 | 4.47E-09   |
| LOC101482261 | NoAnnotation | NoAnnotation | -7.2948127 | 1.27E-07   |
| LOC101485610 | NoAnnotation | NoAnnotation | -7.1220965 | 1.57E-07   |
| LOC101483313 | NoAnnotation | NoAnnotation | -7.1057841 | 1.97E-07   |
| LOC105940457 | NoAnnotation | NoAnnotation | -6.8352378 | 3.74E-07   |
| LOC101473953 | NoAnnotation | NoAnnotation | -6.7607396 | 5.84E-08   |
| LOC101465498 | NoAnnotation | NoAnnotation | -6.6681575 | 2.76E-06   |
| LOC101473214 | NoAnnotation | NoAnnotation | -6.4518399 | 3.37E-07   |
| LOC101477465 | NoAnnotation | NoAnnotation | -6.1965811 | 2.02E-05   |
| LOC101473038 | NoAnnotation | NoAnnotation | -6.0157763 | 1.81E-06   |
| LOC106676108 | NoAnnotation | NoAnnotation | -5.8083135 | 4.54E-10   |
| LOC106676110 | NoAnnotation | NoAnnotation | -5.7719529 | 8.01E-06   |
| LOC106675205 | NoAnnotation | NoAnnotation | -5.5970654 | 7.03E-09   |
| LOC101469477 | NoAnnotation | NoAnnotation | -5.5962268 | 3.54E-05   |
| LOC106675957 | NoAnnotation | NoAnnotation | -5.5458004 | 0.0001299  |
| LOC101467402 | NoAnnotation | NoAnnotation | -5.5117306 | 8.62E-06   |
| LOC101478774 | NoAnnotation | NoAnnotation | -5.4771876 | 8.59E-06   |
| LOC101483183 | NoAnnotation | NoAnnotation | -5.3983712 | 1.20E-05   |
| LOC101471358 | NoAnnotation | NoAnnotation | -5.3677137 | 0.00011752 |
| LOC101478401 | NoAnnotation | NoAnnotation | -5.333132  | 2.22E-05   |
| LOC101468729 | NoAnnotation | NoAnnotation | -5.2258482 | 2.48E-06   |
| LOC101484134 | NoAnnotation | NoAnnotation | -5.1983963 | 1.29E-05   |
| LOC101475002 | NoAnnotation | NoAnnotation | -5.1971196 | 0.00015398 |
| LOC101465126 | NoAnnotation | NoAnnotation | -5.1254038 | 7.13E-05   |
| LOC101475037 | NoAnnotation | NoAnnotation | -5.043006  | 3.72E-05   |
| LOC101467796 | NoAnnotation | NoAnnotation | -5.0294463 | 9.02E-06   |

|              |              |              |            |            |
|--------------|--------------|--------------|------------|------------|
| LOC106676740 | NoAnnotation | NoAnnotation | -5.0187919 | 9.64E-05   |
| LOC106675964 | NoAnnotation | NoAnnotation | -4.9998682 | 4.75E-05   |
| LOC106675304 | NoAnnotation | NoAnnotation | -4.910182  | 1.97E-05   |
| LOC106675134 | NoAnnotation | NoAnnotation | -4.8864423 | 2.98E-05   |
| LOC101470830 | NoAnnotation | NoAnnotation | -4.8470342 | 0.00022416 |
| LOC101482349 | NoAnnotation | NoAnnotation | -4.7841243 | 0.00034832 |
| LOC101482651 | NoAnnotation | NoAnnotation | -4.6279947 | 5.47E-05   |
| LOC106676687 | NoAnnotation | NoAnnotation | -4.5818747 | 0.0072775  |
| LOC101465630 | NoAnnotation | NoAnnotation | -4.5651843 | 0.0002036  |
| LOC101471829 | NoAnnotation | NoAnnotation | -4.4882488 | 0.00074237 |
| LOC101476136 | NoAnnotation | NoAnnotation | -4.4810199 | 0.00011444 |
| LOC101464600 | NoAnnotation | NoAnnotation | -4.4517011 | 0.00022121 |
| LOC106674633 | NoAnnotation | NoAnnotation | -4.3558069 | 6.34E-05   |
| LOC101470155 | NoAnnotation | NoAnnotation | -4.3424446 | 0.000242   |
| LOC101481854 | NoAnnotation | NoAnnotation | -4.321127  | 0.00013353 |
| LOC101469353 | NoAnnotation | NoAnnotation | -4.2897853 | 0.00075913 |
| LOC101487210 | NoAnnotation | NoAnnotation | -4.2866035 | 0.00023332 |
| LOC101468467 | NoAnnotation | NoAnnotation | -4.2494304 | 0.00014582 |
| LOC101473401 | NoAnnotation | NoAnnotation | -4.2318037 | 0.00078739 |
| LOC101475026 | NoAnnotation | NoAnnotation | -4.197133  | 0.00015666 |
| LOC101483272 | NoAnnotation | NoAnnotation | -4.1555972 | 0.00013887 |
| LOC106676338 | NoAnnotation | NoAnnotation | -4.1529826 | 0.00049239 |
| LOC106675923 | NoAnnotation | NoAnnotation | -4.1248786 | 0.00854519 |
| LOC105940619 | NoAnnotation | NoAnnotation | -4.0965154 | 0.00027522 |
| LOC101470258 | NoAnnotation | NoAnnotation | -4.0752627 | 0.00096408 |
| LOC101463946 | NoAnnotation | NoAnnotation | -4.0675594 | 0.00027583 |
| LOC106675147 | NoAnnotation | NoAnnotation | -4.0647623 | 0.00145601 |
| LOC101487722 | NoAnnotation | NoAnnotation | -4.0500871 | 0.00145205 |
| LOC106674563 | NoAnnotation | NoAnnotation | -3.9516294 | 0.00065172 |
| LOC106676234 | NoAnnotation | NoAnnotation | -3.8914549 | 0.00107411 |
| LOC101468776 | NoAnnotation | NoAnnotation | -3.8861151 | 0.00017839 |
| LOC101483716 | NoAnnotation | NoAnnotation | -3.860085  | 0.00112933 |
| LOC101479484 | NoAnnotation | NoAnnotation | -3.710309  | 0.00215439 |
| LOC101470013 | NoAnnotation | NoAnnotation | -3.6793614 | 0.00428826 |
| LOC101474461 | NoAnnotation | NoAnnotation | -3.664385  | 0.00204018 |
| LOC101464544 | NoAnnotation | NoAnnotation | -3.6517681 | 0.00181794 |
| LOC106676852 | NoAnnotation | NoAnnotation | -3.6418295 | 0.00084455 |
| LOC101484466 | NoAnnotation | NoAnnotation | -3.6315277 | 0.00414809 |
| LOC101473487 | NoAnnotation | NoAnnotation | -3.629869  | 0.00088225 |
| LOC101467896 | NoAnnotation | NoAnnotation | -3.6090428 | 0.00263368 |
| LOC101485541 | NoAnnotation | NoAnnotation | -3.5899565 | 0.00141992 |

|              |              |              |            |            |
|--------------|--------------|--------------|------------|------------|
| LOC101471451 | NoAnnotation | NoAnnotation | -3.5886318 | 0.0006929  |
| LOC101474750 | NoAnnotation | NoAnnotation | -3.5524037 | 0.00961291 |
| LOC101471391 | NoAnnotation | NoAnnotation | -3.5345718 | 0.00230756 |
| LOC105941453 | NoAnnotation | NoAnnotation | -3.5293417 | 0.00165275 |
| LOC106675999 | NoAnnotation | NoAnnotation | -3.5103124 | 0.00095569 |
| LOC101478481 | NoAnnotation | NoAnnotation | -3.4981024 | 0.00052346 |
| LOC101468425 | NoAnnotation | NoAnnotation | -3.4926966 | 0.00256364 |
| LOC106675467 | NoAnnotation | NoAnnotation | -3.4629599 | 0.00150951 |
| LOC101481277 | NoAnnotation | NoAnnotation | -3.4387177 | 0.001881   |
| LOC101483238 | NoAnnotation | NoAnnotation | -3.4256975 | 0.00326209 |
| LOC101465215 | NoAnnotation | NoAnnotation | -3.380034  | 0.00675834 |
| LOC101465273 | NoAnnotation | NoAnnotation | -3.354205  | 0.0020544  |
| LOC101485971 | NoAnnotation | NoAnnotation | -3.3468227 | 0.00897072 |
| LOC106674947 | NoAnnotation | NoAnnotation | -3.3452896 | 0.01025027 |
| LOC101470285 | NoAnnotation | NoAnnotation | -3.3303615 | 0.00344638 |
| LOC101471383 | NoAnnotation | NoAnnotation | -3.2830778 | 0.00452435 |
| LOC101464915 | NoAnnotation | NoAnnotation | -3.2820856 | 0.00529053 |
| LOC106675131 | NoAnnotation | NoAnnotation | -3.2472233 | 0.00616311 |
| LOC106676656 | NoAnnotation | NoAnnotation | -3.2413271 | 0.00617732 |
| LOC101485997 | NoAnnotation | NoAnnotation | -3.225878  | 0.00507766 |
| LOC106676128 | NoAnnotation | NoAnnotation | -3.2192447 | 0.00477595 |
| LOC106675956 | NoAnnotation | NoAnnotation | -3.2054767 | 0.00569523 |
| LOC101480915 | NoAnnotation | NoAnnotation | -3.186431  | 0.00571356 |
| LOC101474584 | NoAnnotation | NoAnnotation | -3.1448238 | 0.00709059 |
| LOC101478376 | NoAnnotation | NoAnnotation | -3.0841738 | 0.00044235 |
| LOC106675552 | NoAnnotation | NoAnnotation | -3.0509477 | 0.00423606 |
| LOC101482736 | NoAnnotation | NoAnnotation | -3.0177403 | 0.00419685 |
| LOC101476986 | NoAnnotation | NoAnnotation | -3.0049362 | 0.01057674 |
| LOC101471756 | NoAnnotation | NoAnnotation | -2.9740785 | 0.00639848 |
| LOC105940511 | NoAnnotation | NoAnnotation | -2.972004  | 0.00538921 |
| LOC101487050 | NoAnnotation | NoAnnotation | -2.968832  | 0.00549063 |
| LOC106674678 | NoAnnotation | NoAnnotation | -2.8869991 | 0.00976295 |
| LOC101476945 | NoAnnotation | NoAnnotation | -2.8796378 | 0.0062699  |
| LOC101480981 | NoAnnotation | NoAnnotation | -2.8795035 | 0.00573816 |
| LOC101482772 | NoAnnotation | NoAnnotation | -2.8493562 | 0.0087942  |
| LOC101463817 | NoAnnotation | NoAnnotation | -2.7855606 | 0.00865175 |
| LOC106676096 | NoAnnotation | NoAnnotation | -2.4002444 | 0.00375711 |
| LOC101474666 | NoAnnotation | NoAnnotation | -2.3715806 | 2.53E-05   |
| LOC101472336 | NoAnnotation | NoAnnotation | -2.2271749 | 0.0029353  |
| LOC101487883 | NoAnnotation | NoAnnotation | -1.9963299 | 0.00368808 |
| LOC101467927 | NoAnnotation | NoAnnotation | -1.885811  | 0.00698391 |

|              |         |                |            |            |
|--------------|---------|----------------|------------|------------|
| LOC101474399 | NPHS1   | nephrosis 1, c | -6.8742659 | 1.40E-09   |
| LOC101465198 | NPR2    | natriuretic pe | -3.5587392 | 0.0007985  |
| LOC101478879 | NPR2    | natriuretic pe | -3.0573711 | 0.00374773 |
| LOC101463939 | NPR2    | natriuretic pe | -2.866977  | 0.0043701  |
| LOC101479763 | NRG1    | neuregulin 1   | -4.9675111 | 0.00011656 |
| nsfl1c       | NSFL1C  | NSFL1 (p97) c  | -3.8835859 | 0.00161362 |
| LOC101468566 | NT5C1B  | 5'-nucleotida  | -3.6044374 | 0.00247419 |
| nt5dc2       | NT5DC2  | 5'-nucleotida  | -2.8032193 | 0.00233936 |
| ntmt1        | NTMT1   | N-terminal Xa  | -4.433997  | 0.00025738 |
| nudt13       | NUDT13  | nudix (nucleo  | -4.359546  | 0.00070105 |
| LOC101474324 | NUGGC   | nuclear GTPa   | -3.0563976 | 0.00393579 |
| LOC101473846 | NUGGC   | nuclear GTPa   | -3.0139954 | 0.00507113 |
| nus1         | NUS1    | nuclear unde   | -3.4515842 | 0.00702104 |
| nxph4        | NXP4    | neurexophilin  | -3.7531189 | 0.00105891 |
| obscn        | OBSCN   | obscurin, cyto | -3.2516046 | 0.00194338 |
| LOC101466532 | OCEL1   | occludin/ELL   | -3.1870004 | 0.00437677 |
| omg          | OMG     | oligodendrocy  | -2.9455279 | 0.00653347 |
| LOC101466074 | OSBP2   | oxysterol bind | -4.1296933 | 0.00105171 |
| LOC101485211 | OSBPL7  | oxysterol bind | -10.732715 | 2.31E-13   |
| LOC101467260 | OSMR    | oncostatin M   | -4.956783  | 0.00029819 |
| LOC101469687 | OSR1    | odd-skipped 1  | -5.2828199 | 2.58E-05   |
| ovol1        | OVOL1   | ovo-like 1(Dro | -4.6286461 | 5.35E-05   |
| LOC101471516 | OXS1    | oxidative-stre | -2.7904455 | 0.01055123 |
| LOC101487202 | PACS2   | phosphofurin   | -6.6332838 | 1.10E-06   |
| LOC101469954 | PACS2   | phosphofurin   | -2.438866  | 0.01166528 |
| pacsin3      | PACSIN3 | protein kinase | -3.7784423 | 0.00183863 |
| paics        | PAICS   | phosphoribos   | -2.8207898 | 0.00081875 |
| LOC101484450 | PAK3    | p21 protein (C | -3.3659011 | 0.00189193 |
| LOC101464122 | PAK6    | p21 protein (C | -7.8710362 | 7.27E-09   |
| LOC101482825 | PAOX    | polyamine ox   | -6.4868255 | 7.34E-06   |
| paqr6        | PAQR6   | progesterone   | -3.7944595 | 0.00465872 |
| LOC101478411 | PARD6A  | par-6 partitio | -3.9837197 | 0.0011586  |
| LOC106674480 | PARP12  | poly (ADP-rib  | -3.3965105 | 0.00140055 |
| LOC101471084 | PARP14  | poly (ADP-rib  | -4.6167873 | 0.00044806 |
| LOC101473124 | PARP14  | poly (ADP-rib  | -4.2582292 | 0.00047226 |
| LOC101471969 | PARP14  | poly (ADP-rib  | -3.8110772 | 0.00093145 |
| LOC101465440 | PARP15  | poly (ADP-rib  | -7.2445418 | 4.94E-07   |
| LOC101464676 | PARP15  | poly (ADP-rib  | -4.6122563 | 0.00145807 |
| LOC106676250 | PARP15  | poly (ADP-rib  | -4.1965842 | 0.00016415 |
| LOC101465156 | PARP15  | poly (ADP-rib  | -4.1444304 | 9.35E-05   |
| LOC101464863 | PARP15  | poly (ADP-rib  | -3.9504015 | 0.00131569 |

|              |          |                 |            |            |
|--------------|----------|-----------------|------------|------------|
| LOC101464392 | PARP15   | poly (ADP-rib   | -3.8947244 | 0.00314952 |
| patl1        | PATL1    | protein assoc   | -3.7544487 | 0.00199722 |
| LOC101487230 | PBX2     | pre-B-cell leu  | -4.2410962 | 0.00080567 |
| pbx4         | PBX4     | pre-B-cell leu  | -4.8168546 | 9.96E-05   |
| pck2         | PCK2     | phosphoenol     | -4.582998  | 0.00045719 |
| pcp4         | PCP4     | Purkinje cell p | -4.8162949 | 3.15E-05   |
| pcsk7        | PCSK7    | proprotein cc   | -4.7957569 | 6.82E-07   |
| LOC101476669 | PCSK7    | proprotein cc   | -2.890393  | 0.00901019 |
| pdap1        | PDAP1    | PDGFA associ    | -3.8030199 | 0.0008877  |
| LOC106676169 | PDCD1LG2 | programmed      | -6.2455318 | 6.71E-07   |
| LOC106676168 | PDCD1LG2 | programmed      | -4.6625001 | 0.00015649 |
| LOC101486556 | PDE4C    | phosphodiect    | -7.1907873 | 3.37E-07   |
| LOC101464089 | PDE4DIP  | phosphodiect    | -4.7998471 | 0.00012777 |
| LOC101472679 | PDE6H    | phosphodiect    | -4.3358446 | 0.00065068 |
| pde7b        | PDE7B    | phosphodiect    | -3.3246608 | 0.0027638  |
| LOC101480551 | PDIA2    | protein disulf  | -4.4270797 | 2.57E-05   |
| LOC101481409 | PDIK1L   | PDLIM1 inter    | -3.2641766 | 0.00364039 |
| LOC101467182 | PEAR1    | platelet endo   | -4.5541222 | 1.63E-07   |
| pelo         | PELO     | pelota homol    | -5.1103494 | 1.53E-05   |
| perp         | PERP     | PERP, TP53 a    | -3.4932832 | 0.00138678 |
| pex11a       | PEX11A   | peroxisomal l   | -3.0650255 | 0.00988373 |
| LOC101465745 | PFN3     | profilin 3 [So  | -5.3004726 | 0.00010653 |
| pgap3        | PGAP3    | post-GPI atta   | -3.4079674 | 0.00786032 |
| LOC106675998 | PGBD4    | piggyBac tran   | -2.4837638 | 0.00194217 |
| LOC101473884 | PGLYRP1  | peptidoglycar   | -4.7794801 | 0.00013274 |
| LOC101475096 | PHACTR4  | phosphatase     | -4.1553701 | 0.00014573 |
| LOC101465856 | PHB2     | prohibitin 2 [  | -3.5996884 | 0.00871176 |
| phgdh        | PHGDH    | phosphoglyce    | -4.6922161 | 8.51E-05   |
| LOC101480121 | PHLDA3   | pleckstrin hor  | -3.8169657 | 0.00153706 |
| phldb3       | phldb3   | pleckstrin hor  | -4.7430532 | 7.95E-05   |
| LOC101476416 | PI4KB    | phosphatidyli   | -2.8572272 | 0.00724266 |
| LOC101474114 | PIK3CA   | phosphatidyli   | -4.7837511 | 0.00019717 |
| LOC101481450 | PIK3R1   | phosphoinosi    | -3.6271993 | 0.00057623 |
| LOC101463967 | PIK3R5   | phosphoinosi    | -3.1954985 | 0.00295687 |
| pim1         | PIM1     | pim-1 oncoge    | -7.1423789 | 2.27E-07   |
| LOC106676929 | PIM2     | pim-2 oncoge    | -4.06471   | 0.00097684 |
| LOC101473319 | PIM2     | pim-2 oncoge    | -3.2114451 | 0.00373561 |
| LOC101482492 | PIP5K1B  | phosphatidyli   | -3.1860058 | 0.00353273 |
| LOC101468791 | PITPNA   | phosphatidyli   | -4.5833819 | 0.00011663 |
| LOC101487503 | PKLR     | pyruvate kina   | -3.1898131 | 0.01062755 |
| pkn2         | PKN2     | protein kinas   | -2.9989345 | 0.00068182 |



|              |         |                |            |            |
|--------------|---------|----------------|------------|------------|
| LOC101478860 | PKN3    | protein kinase | -3.8987772 | 0.00494194 |
| LOC101481283 | PKP1    | plakophilin 1  | -3.1415083 | 0.00046898 |
| pkp3         | pkp3    | plakophilin 3  | -6.0788244 | 1.25E-07   |
| oc90         | PLA2G10 | phospholipase  | -2.8923818 | 0.00596381 |
| LOC101469077 | PLA2G16 | phospholipase  | -3.1074302 | 0.00435717 |
| LOC101477336 | PLA2G4C | phospholipase  | -5.5682923 | 2.48E-06   |
| LOC101472639 | PLAC8L1 | PLAC8-like 1   | -5.9849897 | 7.03E-07   |
| LOC101472126 | PLAC8L1 | PLAC8-like 1   | -5.2578071 | 3.30E-06   |
| LOC101484068 | PLAC8L1 | PLAC8-like 1   | -3.0197143 | 0.00628915 |
| LOC101470994 | PLB1    | phospholipase  | -3.1923233 | 0.00528841 |
| plcb3        | PLCB3   | phospholipase  | -3.2863345 | 0.01042794 |
| plce1        | PLCE1   | phospholipase  | -4.1707303 | 0.00016808 |
| LOC101485579 | PLCXD1  | phosphatidyli  | -3.5535756 | 2.76E-05   |
| LOC101480604 | PLCXD1  | phosphatidyli  | -2.6250061 | 0.00770786 |
| LOC101480937 | PLCXD2  | phosphatidyli  | -3.8435747 | 0.00331466 |
| LOC101487611 | PLCZ1   | phospholipase  | -4.3675417 | 0.00044041 |
| LOC101475558 | PLEKHA6 | pleckstrin hom | -3.9517015 | 0.00401183 |
| LOC101473336 | PLEKHF1 | pleckstrin hom | -3.3730492 | 0.00303407 |
| plekhg3      | PLEKHG3 | pleckstrin hom | -4.1913649 | 0.00294566 |
| LOC101472683 | PLEKHG4 | pleckstrin hom | -3.5137735 | 0.00399439 |
| plekhg6      | PLEKHG6 | pleckstrin hom | -7.3434425 | 1.01E-07   |
| plekhg7      | PLEKHG7 | pleckstrin hom | -3.3250796 | 0.00369229 |
| plekhs1      | PLEKHS1 | pleckstrin hom | -3.893597  | 0.00063345 |
| LOC101477699 | PLSCR4  | phospholipid   | -3.8871536 | 0.00335215 |
| LOC101484021 | PLXNC1  | plexin C1 [So  | -5.6858488 | 7.91E-06   |
| pnkd         | pnkd    | paroxysmal n   | -3.7815586 | 0.00015312 |
| pnn          | PNN     | pinin, desmo   | -2.3993167 | 0.00981214 |
| LOC101477825 | PNP     | purine nuclec  | -6.3505583 | 4.01E-07   |
| poc1a        | POC1A   | POC1 centrio   | -3.9877061 | 0.00043541 |
| polq         | POLQ    | polymerase (l  | -2.7223469 | 0.00022168 |
| LOC101475101 | PON1    | paraoxonase    | -1.9113205 | 0.00083255 |
| pop4         | POP4    | processing of  | -4.8754434 | 8.15E-05   |
| pot1         | POT1    | protection of  | -5.8657732 | 1.53E-06   |
| pou1f1       | POU1F1  | POU class 1 h  | -2.8112861 | 0.00677663 |
| pou2af1      | POU2AF1 | POU class 2 a  | -3.2766672 | 0.00138595 |
| plpp6        | PPAPDC2 | phosphatidic   | -6.0816246 | 5.26E-08   |
| LOC101483779 | PPFIA3  | protein tyrosi | -4.3864689 | 0.00018774 |
| ppil1        | PPIL1   | peptidylproly  | -4.4879824 | 0.00017712 |
| ppl          | PPL     | periplakin [Sc | -10.200566 | 2.48E-12   |
| LOC101472635 | PPP1CB  | protein phosp  | -1.9227667 | 0.00691008 |
| ankrd66      | PPP1R27 | protein phosp  | -5.4178007 | 0.00020938 |

|              |                |                                     |            |            |
|--------------|----------------|-------------------------------------|------------|------------|
| LOC101466175 | PPP1R3C        | protein phosphatase 1               | -9.3059105 | 2.54E-09   |
| prkaa2       | PRKAA2         | protein kinase A2                   | -10.30273  | 1.89E-12   |
| LOC101470867 | PRKAB2         | protein kinase A2                   | -2.9455279 | 0.00653347 |
| prkx         | PRKX           | protein kinase X                    | -3.4760449 | 0.00447131 |
| LOC101472831 | PRLR           | prolactin receptor                  | -3.5549151 | 0.00260499 |
| prox1        | PROX1          | prospero homolog 1                  | -3.5499426 | 0.00274459 |
| prpf38b      | PRPF38B        | PRP38 pre-mRNA splicing factor      | -3.0169642 | 0.00014482 |
| LOC101471970 | PRR14          | proline rich 14                     | -14.484647 | 5.80E-17   |
| LOC101472909 | PRR15          | proline rich 15                     | -4.7652493 | 5.62E-05   |
| LOC101477823 | PRRG1          | proline rich G1                     | -3.9927421 | 0.0001799  |
| LOC101466526 | PRRG4          | proline rich G4                     | -5.074663  | 2.06E-05   |
| LOC101476403 | PRRT3          | proline-rich transcript 3           | -3.4775226 | 0.00391474 |
| LOC105941023 | PRSS42         | protease, serine 42                 | -11.49934  | 2.26E-11   |
| prss8        | PRSS42         | protease, serine 42                 | -6.1474055 | 2.15E-06   |
| LOC101481279 | PRSS42         | protease, serine 42                 | -4.9547482 | 2.82E-05   |
| LOC101486191 | PRSS42         | protease, serine 42                 | -4.8111193 | 7.50E-06   |
| LOC101477959 | PRUNE2         | prune homolog 2                     | -6.457648  | 1.37E-06   |
| psat1        | PSAT1          | phosphoserine aminotransferase 1    | -3.9607854 | 0.0073649  |
| LOC101472814 | PSMB10         | proteasome (20S) subunit 10         | -3.464427  | 0.0057868  |
| LOC101472537 | PSMB9          | proteasome (20S) subunit 9          | -3.0846519 | 0.00223493 |
| LOC101485841 | PSME4          | proteasome (26S) subunit 4          | -4.7855985 | 0.00038459 |
| LOC101469155 | PSORS1C2       | psoriasis susceptibility 1C2        | -6.8861481 | 1.81E-07   |
| LOC101468134 | PTAFR          | platelet-activating factor receptor | -7.9119271 | 1.55E-09   |
| ptdss2       | PTDSS2         | phosphatidylserine decarboxylase 2  | -4.0248722 | 0.00021248 |
| LOC101466179 | PTGDR2         | prostaglandin synthase 2            | -6.5394567 | 1.86E-05   |
| aarsd1       | PTGES3L-AARSD1 | PTGES3L-AARSD1                      | -5.3244582 | 5.89E-07   |
| ptgfrn       | PTGFRN         | prostaglandin synthase              | -4.4706723 | 0.00028658 |
| LOC101476415 | PTGIS          | prostaglandin synthase              | -4.5767363 | 0.00013278 |
| LOC101466406 | PTPN18         | protein tyrosine phosphatase 18     | -3.8189337 | 0.00404985 |
| LOC101482516 | PTPN7          | protein tyrosine phosphatase 7      | -6.1360704 | 2.02E-06   |
| LOC101474932 | PTPRB          | protein tyrosine phosphatase B      | -5.5162853 | 9.74E-08   |
| ptprz1       | PTPRZ1         | protein tyrosine phosphatase Z1     | -5.419069  | 7.68E-06   |
| pus10        | PUS10          | pseudouridylate synthase 10         | -1.5222919 | 0.00430391 |
| pusl1        | PUSL1          | pseudouridylate synthase 1          | -3.3634367 | 0.00289273 |
| pxmp4        | PXMP4          | peroxisomal membrane protein 4      | -5.0852047 | 3.05E-05   |
| qars         | QARS           | glutaminyl-tRNA synthetase          | -3.0543978 | 0.00041244 |
| LOC101474648 | QRICH1         | glutamine-rich protein 1            | -6.2948685 | 4.73E-07   |
| LOC101463597 | RAB11FIP1      | RAB11 family interacting protein 1  | -5.3977454 | 1.54E-05   |
| rab11fip2    | RAB11FIP2      | RAB11 family interacting protein 2  | -3.0159971 | 0.00939048 |
| LOC101475825 | RAB25          | RAB25, member 25                    | -6.6638916 | 7.04E-07   |
| LOC101463638 | RAB3B          | RAB3B, member 3B                    | -3.4402437 | 0.00255878 |

|              |         |                  |            |            |
|--------------|---------|------------------|------------|------------|
| rabggt       | RABGGTA | Rab geranylge    | -6.7735357 | 8.51E-08   |
| rad23b       | RAD23A  | RAD23 homo       | -3.027313  | 0.00950353 |
| rad9a        | RAD9A   | RAD9 homolc      | -5.9526832 | 3.03E-05   |
| rad9b        | RAD9B   | RAD9 homolc      | -3.8568662 | 0.00240193 |
| LOC101473598 | RAP1GAP | RAP1 GTPase      | -5.5359756 | 0.00060498 |
| rapgef2      | RAPGEF2 | Rap guanine i    | -3.2314346 | 0.00434945 |
| LOC101468354 | RARG    | retinoic acid i  | -3.4802078 | 0.00095229 |
| LOC105940583 | RARRES3 | retinoic acid i  | -3.8540782 | 0.00287194 |
| LOC101481289 | RASD2   | RASD family,     | -4.3222742 | 0.0004566  |
| LOC101471002 | RASEF   | RAS and EF-h     | -3.6760591 | 0.00449779 |
| LOC101472166 | RASGRP4 | RAS guanyl re    | -1.2115437 | 0.01001427 |
| rbm41        | RBM41   | RNA binding i    | -3.7271332 | 0.00132885 |
| rbp7         | RBP7    | retinol bindin   | -11.860667 | 7.29E-12   |
| LOC101476276 | RDH14   | retinol dehyd    | -8.0639035 | 2.49E-10   |
| reep1        | REEP1   | receptor acce    | -3.0343646 | 0.00023632 |
| reep2        | REEP2   | receptor acce    | -3.8011018 | 0.00486636 |
| rfc2         | RFC2    | replication fa   | -3.8240799 | 0.00071622 |
| rfc5         | RFC5    | replication fa   | -4.3108837 | 3.02E-06   |
| LOC101472714 | RFTN1   | raftlin, lipid r | -1.8789673 | 0.00450776 |
| LOC101483324 | RGCC    | regulator of c   | -3.6539484 | 0.00167079 |
| LOC101465819 | RGS13   | regulator of C   | -4.3126841 | 0.00113937 |
| LOC101472472 | RGS18   | regulator of C   | -3.287928  | 0.00876409 |
| LOC101466397 | RGS2    | regulator of C   | -4.6890498 | 0.00014066 |
| LOC101473767 | RGS20   | regulator of C   | -3.3307049 | 0.00550939 |
| rhbdl2       | RHBDL2  | rhomboid, ve     | -3.3610035 | 0.00432193 |
| LOC101469787 | RHOV    | ras homolog 1    | -3.8025199 | 0.00350232 |
| LOC101486182 | RILPL1  | Rab interactir   | -3.2417232 | 0.0032425  |
| ring1        | RING1   | ring finger pr   | -3.2458383 | 0.00020167 |
| riok3        | RIOK3   | RIO kinase 3 [   | -3.259403  | 0.00236006 |
| ripk4        | RIPK4   | receptor-inte    | -8.290768  | 6.25E-10   |
| rnf113a      | RNF113A | ring finger pr   | -3.4961378 | 0.00131965 |
| LOC101471368 | RNF208  | ring finger pr   | -5.1145553 | 0.00024852 |
| LOC101483179 | RNF217  | ring finger pr   | -7.3180531 | 9.26E-07   |
| rnf222       | RNF222  | ring finger pr   | -2.9905123 | 0.00821413 |
| LOC101471307 | RNF38   | ring finger pr   | -4.6398165 | 0.0001095  |
| LOC101478352 | RNF41   | ring finger pr   | -3.2824774 | 0.00270582 |
| rnls         | RNLS    | renalase, FAC    | -4.4620075 | 2.58E-06   |
| LOC101481672 | ROBO3   | roundabout,      | -3.5796997 | 0.00378948 |
| LOC101478009 | RPGR    | retinitis pigm   | -3.9655815 | 0.00031294 |
| LOC101472439 | RPL19   | ribosomal pro    | -1.8901658 | 0.01113947 |
| rpn1         | RPN1    | ribophorin I [   | -2.7755378 | 0.00420573 |

|              |          |                 |            |            |
|--------------|----------|-----------------|------------|------------|
| rpp30        | RPP30    | ribonuclease    | -3.3395678 | 0.0047459  |
| rpp40        | RPP40    | ribonuclease    | -3.3599147 | 0.00096896 |
| LOC101477757 | RPS27L   | ribosomal pro   | -3.7111171 | 1.14E-07   |
| LOC101475486 | RPS6KA1  | ribosomal pro   | -5.3474235 | 7.69E-06   |
| LOC101468435 | RPS6KA5  | ribosomal pro   | -3.1501007 | 0.00668283 |
| LOC101474829 | RSPH6A   | radial spoke f  | -6.2113059 | 1.27E-05   |
| rtnk         | RTKN     | rhotekin [Sou   | -3.7964345 | 0.00185684 |
| rufy1        | RUFY1    | RUN and FYV     | -2.6333396 | 0.00730812 |
| rundc1       | RUNDC1   | RUN domain      | -3.7487735 | 0.00094043 |
| LOC101465462 | RUNDC3A  | RUN domain      | -2.132471  | 0.00296383 |
| rundc3b      | RUNDC3B  | RUN domain      | -2.8921268 | 0.00580242 |
| LOC101485234 | S100P    | S100 calcium    | -7.7260311 | 3.48E-09   |
| LOC101467985 | S100P    | S100 calcium    | -6.1309765 | 8.34E-07   |
| LOC101471430 | SAMD14   | sterile alpha r | -6.8525873 | 2.00E-08   |
| LOC101475261 | SAMD9    | sterile alpha r | -3.3998355 | 0.00122941 |
| sap25        | SAP25    | Sin3A-associ    | -7.1279976 | 4.89E-12   |
| LOC101475165 | SCAMP2   | secretory cari  | -3.9889399 | 0.00138402 |
| scel         | scel     | sciellin        | -10.70988  | 5.41E-14   |
| LOC101470091 | SCIN     | scinderin [Sou  | -3.4194047 | 0.00032535 |
| scmh1        | SCMH1    | sex comb on     | -3.3950221 | 0.01025718 |
| scoc         | SCOC     | short coiled-c  | -3.6793671 | 0.0043157  |
| LOC101474415 | SCOC     | short coiled-c  | -2.9831287 | 0.00272678 |
| sdhd         | SDHD     | succinate def   | -3.6759882 | 0.00277618 |
| secisbp2     | SECISBP2 | SECIS binding   | -6.8103005 | 1.16E-08   |
| LOC101479196 | SEMA4F   | sema domain     | -5.5408776 | 9.35E-06   |
| LOC101475744 | SEMA4F   | sema domain     | -4.1308909 | 0.00215749 |
| LOC101478285 | SERPINB2 | serpin peptid   | -6.1715291 | 1.88E-06   |
| LOC106676165 | SERPINB2 | serpin peptid   | -5.2124275 | 3.17E-05   |
| serpind1     | SERPIND1 | serpin peptid   | -4.1919073 | 0.00055778 |
| LOC101485050 | SESN2    | sestrin 2 [Sou  | -3.6372745 | 0.00322221 |
| LOC101475491 | Sgk3     | Serine/threor   | -3.3439876 | 0.00146226 |
| sgpp2        | SGPP2    | sphingosine-1   | -5.366254  | 7.62E-06   |
| LOC101464567 | SH2D3A   | SH2 domain c    | -5.0201534 | 9.09E-07   |
| LOC101471217 | SH2D4A   | SH2 domain c    | -3.5143678 | 0.00164933 |
| sh3d19       | SH3D19   | SH3 domain c    | -6.0354246 | 3.33E-07   |
| LOC101472080 | SH3KBP1  | SH3-domain f    | -2.9601438 | 0.00050316 |
| LOC101469781 | SH3RF2   | SH3 domain c    | -4.5432072 | 0.00046467 |
| LOC101484394 | SHISA5   | shisa homolo    | -3.8242398 | 0.00091189 |
| LOC101470492 | SHMT2    | serine hydrox   | -5.3498759 | 1.10E-05   |
| LOC101478252 | SHROOM3  | shroom famil    | -3.2834042 | 0.00021002 |
| siah1        | siah1    | siah E3 ubiqu   | -3.4171529 | 7.78E-06   |

|              |          |                |            |            |
|--------------|----------|----------------|------------|------------|
| LOC101471392 | SIAH2    | siah E3 ubiqu  | -3.0552657 | 0.00419349 |
| sigirr       | SIGIRR   | single immun   | -3.0756752 | 0.00840792 |
| sin3a        | SIN3A    | SIN3 transcrip | -4.1287038 | 6.06E-05   |
| LOC101486976 | SIPA1L2  | signal-induce  | -6.3322621 | 4.81E-07   |
| six3         | SIX3     | SIX homeobo    | -5.2007793 | 0.00015889 |
| LOC101481621 | SIX6     | SIX homeobo    | -4.4793004 | 0.00010629 |
| ska2         | SKA2     | spindle and k  | -3.9649967 | 0.00089148 |
| LOC101475294 | SLC12A3  | solute carrier | -4.1557969 | 0.00015198 |
| slc13a4      | SLC13A4  | solute carrier | -1.7624838 | 0.00559513 |
| LOC101471059 | SLC16A1  | solute carrier | -3.8882764 | 0.0026185  |
| slc16a12     | SLC16A12 | solute carrier | -4.4418159 | 0.0002368  |
| slc16a6      | SLC16A6  | solute carrier | -3.7025337 | 0.00427357 |
| slc17a6      | SLC17A7  | solute carrier | -4.2829069 | 0.00057338 |
| LOC101484681 | SLC17A7  | solute carrier | -3.3599985 | 0.00327197 |
| LOC101471102 | SLC1A2   | solute carrier | -4.0708476 | 1.19E-07   |
| LOC101484092 | SLC22A13 | solute carrier | -8.1265326 | 7.71E-10   |
| LOC101479579 | SLC22A13 | solute carrier | -2.9789431 | 0.0054282  |
| slc22a16     | SLC22A16 | solute carrier | -2.9651008 | 0.01044562 |
| LOC101464155 | SLC22A5  | solute carrier | -4.829644  | 0.00015481 |
| LOC101463669 | SLC22A5  | solute carrier | -4.1524129 | 0.0008616  |
| LOC101465478 | SLC22A8  | solute carrier | -3.2592273 | 0.00178023 |
| LOC101488034 | SLC24A3  | solute carrier | -3.5858035 | 0.00162703 |
| slc25a15     | SLC25A15 | solute carrier | -2.947433  | 0.00648431 |
| LOC101474915 | SLC25A30 | solute carrier | -5.1605859 | 2.80E-05   |
| slc25a37     | SLC25A37 | solute carrier | -3.334752  | 0.00349476 |
| LOC101474466 | SLC25A44 | solute carrier | -3.438239  | 0.00011742 |
| LOC101485866 | SLC27A5  | solute carrier | -10.396793 | 2.39E-13   |
| slc2a13      | SLC2A13  | solute carrier | -4.2303568 | 0.0002134  |
| slc30a3      | SLC30A3  | solute carrier | -2.7570548 | 0.0071785  |
| slc31a2      | SLC31A2  | solute carrier | -4.5866616 | 2.22E-05   |
| slc39a6      | SLC39A6  | solute carrier | -3.0884016 | 0.01131004 |
| slc3a1       | SLC3A1   | solute carrier | -1.8613246 | 0.00928136 |
| slc41a3      | SLC41A3  | solute carrier | -3.0250324 | 3.98E-06   |
| LOC101470792 | SLC4A7   | solute carrier | -4.1857347 | 0.00073902 |
| slc5a10      | SLC5A10  | solute carrier | -8.0648724 | 6.95E-11   |
| LOC101475927 | SLC6A12  | solute carrier | -6.3299215 | 8.29E-07   |
| LOC101464398 | SLC6A12  | solute carrier | -3.9106744 | 0.00083765 |
| LOC101476219 | SLC6A12  | solute carrier | -3.5902035 | 0.00307234 |
| LOC101471711 | SLC6A13  | solute carrier | -4.6238603 | 0.00015565 |
| LOC101467277 | SLC6A7   | solute carrier | -5.373791  | 5.21E-05   |
| slc7a11      | SLC7A11  | solute carrier | -3.6079526 | 0.00272135 |

|              |         |                |            |            |
|--------------|---------|----------------|------------|------------|
| LOC101468173 | SLC7A11 | solute carrier | -3.1446659 | 0.00376277 |
| LOC101472120 | SLC7A3  | solute carrier | -3.6635354 | 0.0058829  |
| slc7a5       | SLC7A5  | solute carrier | -7.6688578 | 3.91E-07   |
| LOC101480678 | SLC7A8  | solute carrier | -3.1106923 | 0.00218254 |
| LOC101474155 | SLK     | STE20-like kir | -4.0963577 | 5.05E-06   |
| slx4         | SLX4    | SLX4 structur  | -3.9548576 | 0.00049655 |
| gypc         | SMAGP   | small cell adh | -4.4540857 | 8.14E-05   |
| LOC101477562 | SMCR8   | Smith-Magen    | -9.0312103 | 1.86E-10   |
| smcr8        | SMCR8   | Smith-Magen    | -5.2902213 | 2.06E-05   |
| LOC101467774 | SMTNL2  | smoothelin-li  | -8.3003513 | 3.37E-10   |
| LOC101466871 | SNAPC1  | small nuclear  | -4.8142017 | 5.98E-05   |
| LOC101482807 | SNRK    | SNF related k  | -5.6614758 | 7.78E-06   |
| snrnp48      | SNRNP48 | small nuclear  | -3.6261193 | 0.00586569 |
| snrnp70      | SNRNP70 | small nuclear  | -3.7175554 | 4.84E-07   |
| snrpb        | SNRPB   | small nuclear  | -2.7752725 | 0.01173731 |
| snx29        | snx29   | sorting nexin  | -4.9461109 | 4.16E-05   |
| LOC101465854 | SNX9    | sorting nexin  | -3.9125463 | 0.00262206 |
| LOC101475426 | SOAT2   | sterol O-acylt | -6.1256938 | 3.59E-07   |
| LOC101479828 | SOLH    | small optic lo | -4.5117883 | 4.71E-05   |
| LOC101487636 | SOWAHA  | sosondowah     | -3.2269997 | 0.00654729 |
| LOC101479758 | SOWAHC  | sosondowah     | -6.549878  | 1.47E-06   |
| LOC101484987 | SOX14   | SRY (sex dete  | -6.2891185 | 2.29E-06   |
| sp8          | SP8     | Sp8 transcrip  | -5.3727172 | 1.33E-05   |
| LOC101483953 | SPAG9   | sperm associ   | -5.5558598 | 8.57E-09   |
| LOC101478750 | SPATA13 | spermatogen    | -4.7348909 | 0.00011763 |
| spen         | SPEN    | spen homolo    | -3.2187006 | 0.00647591 |
| LOC101464875 | SPINT1  | serine peptid  | -7.2177273 | 2.71E-07   |
| LOC101480474 | SPIRE1  | spire homolo   | -4.3886384 | 0.00021781 |
| LOC101476411 | SRC     | v-src sarcoma  | -2.8704899 | 0.00423681 |
| LOC101483482 | SRRT    | serrate RNA e  | -3.2818596 | 0.00351123 |
| ssbp3        | SSBP3   | single strand  | -3.3191871 | 0.00353079 |
| LOC101480440 | SSC5D   | scavenger rec  | -10.253427 | 1.94E-14   |
| ssfa2        | SSFA2   | sperm specifi  | -3.4045764 | 0.00718209 |
| LOC101468328 | SST     | somatostatin   | -3.2088251 | 0.00235108 |
| LOC101487446 | SSUH2   | ssu-2 homolo   | -5.0203418 | 0.00021418 |
| LOC101486466 | SSX2IP  | synovial sarcc | -5.6524522 | 3.23E-05   |
| LOC101467249 | ST14    | suppression c  | -5.8650982 | 9.23E-07   |
| LOC101479765 | ST14    | suppression c  | -5.5598124 | 2.55E-05   |
| st14         | ST14    | suppression c  | -4.9143486 | 7.33E-05   |
| LOC101483776 | ST3GAL1 | ST3 beta-gala  | -6.6451153 | 5.59E-08   |
| LOC101484590 | ST3GAL1 | ST3 beta-gala  | -3.2803336 | 0.00139602 |

|              |          |                 |            |            |
|--------------|----------|-----------------|------------|------------|
| LOC101482673 | STARD10  | StAR-related    | -5.4465842 | 1.77E-05   |
| strbp        | STRBP    | spermatid pe    | -3.8053522 | 0.00031563 |
| LOC101480117 | STUB1    | STIP1 homolo    | -3.7363908 | 0.00081751 |
| LOC101481205 | STX11    | syntaxin 11 [S  | -5.4994525 | 2.23E-05   |
| LOC101481496 | STX11    | syntaxin 11 [S  | -3.955844  | 0.0001579  |
| LOC101469074 | STYK1    | serine/threor   | -4.3702229 | 0.0003394  |
| LOC101476872 | SULT1E1  | sulfotransfer   | -5.1083201 | 3.80E-05   |
| svop         | SVOP     | SV2 related p   | -2.1599656 | 0.00510645 |
| swt1         | SWT1     | SWT1 RNA er     | -5.0307414 | 9.63E-05   |
| syce1        | syce1    | synaptonema     | -5.6779535 | 1.58E-08   |
| syce2        | SYCE2    | synaptonema     | -3.0133401 | 0.00529606 |
| sycp1        | SYCP1    | synaptonema     | -11.230222 | 6.63E-13   |
| syne2        | syne2    | spectrin repe   | -5.8657577 | 3.17E-06   |
| syt13        | SYTL3    | synaptotagm     | -3.7896443 | 0.00072906 |
| LOC101478311 | SZRD1    | SUZ RNA binc    | -4.1213785 | 0.00019428 |
| tab3         | TAB3     | TGF-beta acti   | -3.8805601 | 0.00077126 |
| taf1a        | TAF1A    | TATA box bin    | -3.5876507 | 0.00221986 |
| taf8         | TAF8     | TAF8 RNA po     | -2.7513034 | 0.01117979 |
| LOC101479713 | TAGAP    | T-cell activati | -2.9854389 | 0.00919744 |
| tagln        | TAGLN    | transgelin [Sc  | -3.5999481 | 0.00401979 |
| tars         | TARS     | threonyl-tRN    | -5.0388808 | 6.74E-05   |
| LOC101471744 | TAS2R10  | taste recepto   | -3.5255609 | 0.00281487 |
| tbcd23       | TBC1D23  | TBC1 domain     | -6.3506862 | 1.71E-06   |
| LOC101470948 | TBC1D3   | TBC1 domain     | -3.3557287 | 0.00073193 |
| tbl3         | TBL3     | transducin (b   | -5.9949374 | 4.42E-06   |
| LOC101466192 | TBPL2    | TATA box bin    | -3.2485681 | 0.00415004 |
| tcp1         | TCP1     | t-complex 1 [   | -1.7510778 | 0.00664341 |
| LOC106676806 | TDP2     | tyrosyl-DNA p   | -4.275401  | 0.00021035 |
| LOC106676723 | TDP2     | tyrosyl-DNA p   | -3.3875091 | 0.01014497 |
| LOC105940876 | TDP2     | tyrosyl-DNA p   | -3.092498  | 0.00487912 |
| tecr         | TECR     | trans-2,3-enc   | -4.8800945 | 3.58E-05   |
| tep1         | TEP1     | telomerase-a    | -3.3004487 | 0.00144122 |
| LOC101487114 | TERF2    | telomeric rep   | -3.4848523 | 0.00062358 |
| LOC101463758 | TESC     | tescalcin [Sou  | -3.0177403 | 0.00419685 |
| tex11        | TEX11    | testis express  | -5.9939768 | 2.15E-07   |
| tfap2a       | TFAP2A   | transcription   | -3.6366885 | 0.00246618 |
| tfap2c       | TFAP2C   | transcription   | -4.3825396 | 0.00041345 |
| tgfbra1      | TGFBRAP1 | transforming    | -4.9348729 | 0.00019674 |
| tgm1         | TGM1     | transglutamir   | -9.8339195 | 2.53E-12   |
| LOC101467439 | THADA    | thyroid adenc   | -8.0497049 | 2.14E-08   |
| thap7        | THAP7    | THAP domain     | -5.9590407 | 5.22E-07   |

|              |          |                 |            |            |
|--------------|----------|-----------------|------------|------------|
| thegl        | THEGL    | theg spermat    | -3.0692556 | 0.00714929 |
| thoc6        | THOC6    | THO complex     | -5.258521  | 1.86E-05   |
| LOC101477439 | THRSP    | thyroid horm    | -2.9336713 | 0.00625705 |
| thumpd1      | THUMPD1  | THUMP doma      | -2.8704657 | 0.01015302 |
| LOC101479171 | TIGD1    | tigger transp   | -9.0674295 | 8.64E-08   |
| LOC101470325 | TJP3     | tight junction  | -6.4080208 | 1.53E-06   |
| tlcd1        | TLCD1    | TLC domain c    | -6.8075543 | 8.05E-08   |
| LOC101463793 | TLR2     | toll-like recep | -3.3701941 | 0.00186421 |
| tlr5         | TLR5     | toll-like recep | -3.2618242 | 0.00676103 |
| LOC101484470 | TMCC1    | transmembra     | -3.4372212 | 0.00213283 |
| tmed1        | TMED1    | transmembra     | -5.7535087 | 6.49E-06   |
| tmem100      | TMEM100  | transmembra     | -4.5250681 | 0.00078894 |
| LOC101471304 | TMEM120B | transmembra     | -3.8318327 | 0.00150808 |
| tmem130      | TMEM130  | transmembra     | -6.1076114 | 5.87E-06   |
| LOC101475208 | TMEM132B | transmembra     | -6.8979683 | 1.54E-07   |
| LOC101473348 | TMEM138  | transmembra     | -4.7174234 | 0.00024655 |
| tmem163      | TMEM163  | transmembra     | -5.3608606 | 6.77E-07   |
| LOC101477618 | TMEM198  | transmembra     | -6.8422271 | 2.68E-06   |
| tmem242      | TMEM242  | transmembra     | -3.4487965 | 0.0039729  |
| tmem41a      | TMEM41A  | transmembra     | -3.4683205 | 0.00526917 |
| tmem47       | TMEM47   | transmembra     | -3.0205353 | 0.00447137 |
| tmem57       | TMEM57   | transmembra     | -4.4723374 | 0.00018201 |
| tmem98       | TMEM98   | transmembra     | -5.3286061 | 8.35E-05   |
| tmpo         | TMPO     | thymopoietin    | -3.3629885 | 0.00072412 |
| LOC101476381 | TMPRSS13 | transmembra     | -4.1834899 | 0.00026883 |
| tmub1        | TMUB1    | transmembra     | -3.2095074 | 0.00326335 |
| LOC101482032 | TNFRSF14 | tumor necros    | -3.155598  | 0.00144144 |
| LOC101483010 | TNFRSF14 | tumor necros    | -2.8424879 | 0.0059156  |
| tnfrsf9      | TNFRSF21 | tumor necros    | -3.986705  | 0.00023694 |
| LOC101483661 | TNIK     | TRAF2 and NC    | -3.954071  | 0.00210516 |
| tnik         | TNIK     | TRAF2 and NC    | -3.4185618 | 0.00425487 |
| tnk1         | TNK1     | tyrosine kinas  | -4.1663945 | 0.00305838 |
| LOC101473061 | TNKS     | tankyrase, TR   | -4.3990789 | 0.00025969 |
| LOC101483156 | TNKS1BP1 | tankyrase 1 b   | -12.004749 | 2.09E-14   |
| LOC101474343 | TNNT2    | troponin T tyj  | -3.5601533 | 3.20E-05   |
| LOC101466571 | TOX4     | TOX high mol    | -2.2967509 | 0.00694143 |
| tp53i13      | TP53I13  | tumor proteii   | -2.1644435 | 0.0107295  |
| tp63         | TP63     | tumor proteii   | -5.3810026 | 4.68E-06   |
| tpcn2        | TPCN2    | two pore segl   | -3.0989325 | 0.01086419 |
| LOC101474423 | TPM2     | tropomyosin     | -2.1035649 | 0.00717414 |
| tpo          | TPO      | thyroid perox   | -3.5585052 | 0.00272653 |



|              |         |                 |            |            |
|--------------|---------|-----------------|------------|------------|
| tppp3        | TPPP3   | tubulin polyr   | -5.8344706 | 1.82E-05   |
| LOC101474409 | TPRG1   | tumor protei    | -3.9021325 | 0.00128213 |
| traf6        | TRAF6   | TNF receptor    | -6.6169675 | 4.44E-07   |
| LOC101486755 | TRAK1   | trafficking pro | -3.3354028 | 0.00189117 |
| LOC101477892 | TRIM16  | tripartite mol  | -3.1082758 | 0.00838968 |
| LOC106675019 | TRIM16L | tripartite mol  | -4.600399  | 8.28E-05   |
| LOC101481150 | TRIM16L | tripartite mol  | -2.9140812 | 0.00614875 |
| LOC101470747 | TRIM25  | tripartite mol  | -4.7496493 | 0.00022082 |
| LOC101478395 | TRIM25  | tripartite mol  | -4.212656  | 0.00063494 |
| LOC101481878 | TRIM25  | tripartite mol  | -3.8012817 | 0.00063229 |
| LOC106675640 | TRIM25  | tripartite mol  | -3.7615395 | 0.00260266 |
| LOC101474025 | TRIM25  | tripartite mol  | -3.5952236 | 0.00461843 |
| LOC101475981 | TRIM25  | tripartite mol  | -2.1145315 | 0.00720895 |
| LOC101475734 | TRIM35  | tripartite mol  | -5.1591253 | 3.81E-06   |
| LOC101486807 | TRIM35  | tripartite mol  | -3.9314058 | 0.00048492 |
| LOC101481313 | TRIM35  | tripartite mol  | -3.7418402 | 0.00099485 |
| LOC106676453 | TRIM35  | tripartite mol  | -3.5957378 | 0.00046379 |
| LOC106676210 | TRIM35  | tripartite mol  | -3.4790936 | 0.00207198 |
| LOC106676760 | TRIM35  | tripartite mol  | -3.0567474 | 0.00271913 |
| LOC105940560 | TRIM35  | tripartite mol  | -2.8764932 | 0.00542456 |
| LOC101478914 | TRIM47  | tripartite mol  | -4.7773256 | 0.00013691 |
| LOC101479812 | TRIM47  | tripartite mol  | -4.5610114 | 8.43E-05   |
| LOC106676001 | TRIM47  | tripartite mol  | -4.3268877 | 0.00033284 |
| LOC101476686 | TRIM47  | tripartite mol  | -4.0159667 | 0.00092897 |
| LOC106676036 | TRIM47  | tripartite mol  | -2.9450951 | 0.00300086 |
| LOC101473709 | TRIM47  | tripartite mol  | -2.7855784 | 0.00296476 |
| trip10       | TRIP10  | thyroid horm    | -2.8442633 | 0.01076578 |
| trmt2a       | TRMT2A  | tRNA methylt    | -2.4603542 | 1.25E-05   |
| LOC101472910 | TRPM4   | transient rece  | -3.6686065 | 0.00225742 |
| trpm5        | TRPM5   | transient rece  | -3.0858328 | 4.03E-06   |
| trpv4        | TRPV4   | transient rece  | -3.9704053 | 0.00054384 |
| tsc2         | TSC2    | tuberous scle   | -2.4085494 | 0.00244274 |
| tsen54       | TSEN54  | tRNA splicing   | -3.2708123 | 0.00335743 |
| LOC101476679 | TSPAN16 | tetraspanin 1   | -3.6297027 | 0.00549369 |
| LOC101468263 | TSPAN8  | tetraspanin 8   | -4.520664  | 0.00020344 |
| tssc1        | TSSC1   | tumor suppre    | -2.8580946 | 0.00414315 |
| ttc22        | TTC22   | tetratricopep   | -4.1278427 | 0.00019673 |
| ttc37        | TTC37   | tetratricopep   | -3.6478609 | 0.00096098 |
| LOC101475575 | TUBA8   | tubulin, alph   | -6.8323936 | 1.13E-07   |
| LOC101486701 | TUBA8   | tubulin, alph   | -4.6412573 | 0.00181409 |
| LOC101473957 | TUBB2B  | tubulin, beta   | -3.4410742 | 0.00311332 |

|              |          |                  |            |            |
|--------------|----------|------------------|------------|------------|
| tube1        | TUBE1    | tubulin, epsil   | -3.0140359 | 0.00921825 |
| tubg1        | TUBG1    | tubulin, gamr    | -7.5967277 | 2.79E-08   |
| tubgcp2      | TUBGCP2  | tubulin, gamr    | -3.674204  | 0.00126721 |
| LOC101481929 | TXN      | thioredoxin [S   | -6.4392919 | 1.04E-06   |
| LOC101483363 | TXN      | thioredoxin [S   | -3.7871402 | 0.00225363 |
| tyro3        | TYRO3    | TYRO3 protei     | -3.340648  | 0.00409447 |
| tyrp1        | TYRP1    | tyrosinase-re    | -3.4733979 | 0.00289922 |
| ubb          | UBC      | ubiquitin C [S   | -3.2842063 | 0.00159703 |
| LOC101476756 | UBE2G1   | ubiquitin-con    | -5.7418994 | 1.29E-05   |
| ube2o        | UBE2O    | ubiquitin-con    | -3.9584285 | 0.0001667  |
| LOC101470020 | UBXN1    | UBX domain p     | -4.5662244 | 9.60E-05   |
| LOC101484608 | UCP3     | uncoupling p     | -3.5796744 | 0.00209168 |
| ufd1l        | UFD1L    | ubiquitin fusi   | -3.5216708 | 0.00441495 |
| ugcg         | UGCG     | UDP-glucose      | -4.1234718 | 6.43E-09   |
| uhrf1bp1     | UHRF1BP1 | UHRF1 bindin     | -3.1552122 | 0.00862097 |
| uimc1        | UIMC1    | ubiquitin inte   | -4.9189041 | 6.54E-05   |
| usp11        | USP11    | ubiquitin spe    | -4.6508136 | 6.02E-05   |
| usp45        | USP45    | ubiquitin spe    | -4.4633221 | 2.19E-05   |
| LOC101472044 | VARS     | valyl-tRNA sy    | -4.15285   | 0.00094742 |
| vgll1        | VGLL1    | vestigial like 1 | -4.1654102 | 0.00011726 |
| vill         | VILL     | villin-like [So  | -6.0223233 | 7.00E-07   |
| LOC101472268 | VLDLR    | very low dens    | -7.4567608 | 7.13E-08   |
| vps33b       | VPS33B   | vacuolar prot    | -5.4153418 | 3.92E-08   |
| LOC101486893 | VRK2     | vaccinia relat   | -2.0104784 | 0.00583387 |
| vsig10       | VSIG10   | V-set and imr    | -8.6986223 | 2.92E-11   |
| LOC101464556 | VSIG8    | V-set and imr    | -5.891542  | 6.97E-07   |
| vsx1         | VSX1     | visual system    | -5.011465  | 4.38E-07   |
| LOC101467109 | VTCN1    | V-set domain     | -7.2352428 | 1.49E-07   |
| LOC101466475 | VWA7     | von Willebrar    | -3.7383983 | 0.00295842 |
| vwc2         | VWC2     | von Willebrar    | -7.6078303 | 1.27E-08   |
| LOC101477445 | WBSCR27  | Williams Beu     | -6.8372476 | 3.10E-08   |
| LOC101470374 | WDR37    | WD repeat dc     | -2.4958868 | 0.00363142 |
| LOC101469834 | WDR55    | WD repeat dc     | -2.8159901 | 0.0067217  |
| wdr77        | WDR77    | WD repeat dc     | -3.1482235 | 0.00726419 |
| whamm        | WHAMM    | WAS protein      | -5.6628915 | 7.40E-06   |
| wisp3        | WISP3    | WNT1 inducil     | -3.2188575 | 0.00017336 |
| LOC101479331 | WNT4     | wingless-type    | -5.9373662 | 5.23E-06   |
| LOC101472383 | XIAP     | X-linked inhi    | -3.5219928 | 0.00257492 |
| LOC106675839 | XKR8     | XK, Kell blood   | -6.2962175 | 3.41E-07   |
| xylb         | XYLB     | xylulokinase t   | -3.7171082 | 0.00158908 |
| LOC101471951 | YWHAZ    | tyrosine 3-mc    | -3.8886181 | 4.63E-05   |

|              |         |                 |            |            |
|--------------|---------|-----------------|------------|------------|
| zbtb11       | ZBTB11  | zinc finger an  | -4.9075571 | 3.12E-05   |
| LOC101486737 | ZBTB7B  | zinc finger an  | -5.7614022 | 1.58E-06   |
| zbtb7c       | ZBTB7C  | zinc finger an  | -2.7529555 | 0.00963784 |
| LOC101477172 | ZC3H12A | zinc finger CC  | -3.9336856 | 0.00351798 |
| zc3h12d      | ZC3H12D | zinc finger CC  | -4.2962965 | 0.00044222 |
| zdhhc16      | ZDHHC16 | zinc finger, DI | -8.3768309 | 4.28E-09   |
| zdhhc9       | ZDHHC9  | zinc finger, DI | -3.0366721 | 0.00551885 |
| LOC101473384 | ZFAND3  | zinc finger, AI | -6.8434887 | 1.96E-07   |
| LOC101487224 | ZFP36   | ZFP36 ring fir  | -3.7388657 | 0.00508544 |
| LOC106675584 | ZFP41   | ZFP41 zinc fin  | -2.8552009 | 0.00755762 |
| LOC101483436 | ZFYVE16 | zinc finger, FY | -5.0069029 | 3.17E-05   |
| LOC101485417 | ZNF101  | zinc finger pro | -5.9692037 | 1.97E-06   |
| LOC101463705 | ZNF101  | zinc finger pro | -3.4680623 | 0.00194079 |
| LOC101480628 | ZNF296  | zinc finger pro | -8.617733  | 4.15E-11   |
| znf367       | ZNF367  | zinc finger pro | -5.5448013 | 9.30E-06   |
| LOC101471277 | ZNF502  | zinc finger pro | -5.6555559 | 1.28E-05   |
| LOC101478196 | ZNF502  | zinc finger pro | -2.9605714 | 0.00125729 |
| LOC101481343 | ZNF576  | zinc finger pro | -3.6514477 | 0.00041389 |
| LOC101466793 | ZNF609  | zinc finger pro | -3.1810286 | 0.00390325 |
| LOC101463744 | ZNF654  | zinc finger pro | -3.6118227 | 0.00930072 |
| znf703       | ZNF703  | zinc finger pro | -3.5603488 | 0.00346158 |
| LOC101472631 | ZNF706  | zinc finger pro | -4.3713522 | 0.00070763 |
| znf750       | ZNF750  | zinc finger pro | -7.1371333 | 6.49E-08   |
| LOC101481586 | ZP3     | zona pellucid   | -3.6480263 | 1.89E-05   |
| LOC101466359 | ZP3     | zona pellucid   | -3.2473931 | 0.00433398 |
| LOC101487026 | ZP3     | zona pellucid   | -2.8923818 | 0.00596381 |
| zzef1        | ZZEF1   | zinc finger, Zz | -2.504284  | 0.01031543 |

**adj.P.Val**

0.02297115  
0.00039435  
1.85E-11  
0.00356057  
5.18E-06  
0.03634626  
0.00105693  
0.00129944  
0.00469053  
0.00186453  
3.65E-09  
6.87E-07  
0.00214425  
3.93E-05  
6.84E-07  
0.03589067  
0.00191261  
0.01379186  
0.03178676  
1.51E-07  
0.00715919  
0.03170032  
0.00061843  
0.01138063  
7.70E-06  
0.03425148  
3.63E-05  
0.01261337  
0.0473247  
0.00148613  
2.89E-05  
0.02670712  
0.02590381  
0.01705115  
1.21E-05  
0.01996665  
3.03E-06  
0.01382976  
0.00887427  
0.04853366

0.03045416  
0.00124798  
0.00150167  
0.00290085  
0.04366206  
0.01636329  
0.0061091  
0.01541599  
7.00E-07  
0.00026931  
0.00245879  
0.02163539  
0.00425979  
0.01030527  
0.02039175  
0.00051164  
0.0002412  
0.00348144  
0.00107998  
5.71E-05  
0.00136604  
0.04628377  
0.02988976  
0.03751821  
0.00159444  
0.00454904  
0.03675929  
0.01466967  
0.0093783  
0.0120048  
0.00490414  
0.00903329  
0.00781367  
0.00019565  
0.00125142  
0.00024188  
0.02445248  
0.00463552  
0.00245839  
0.02997206  
0.03356529

0.00611044  
0.00014799  
7.19E-05  
1.11E-09  
0.00935807  
0.01883862  
0.02577002  
7.83E-06  
0.036587  
0.00085442  
4.12E-06  
0.0222696  
0.03168139  
0.04272897  
0.00042322  
0.0106406  
0.00157056  
0.00204007  
0.03317625  
0.01283886  
1.63E-06  
2.57E-06  
0.00665324  
0.04874363  
0.01727165  
0.03681877  
0.02744445  
6.11E-05  
0.0267719  
0.03387295  
6.10E-05  
0.00017098  
0.00097814  
0.033338  
0.00292156  
0.02459193  
0.02729791  
0.00365321  
8.56E-07  
0.02059382  
0.01299203

0.03359068  
0.00469627  
0.00302248  
0.04159713  
2.41E-07  
0.01184239  
0.01809579  
0.02718046  
0.04992809  
9.70E-05  
0.00518416  
0.00042693  
0.01771416  
0.00490796  
0.00088266  
1.59E-07  
0.00193919  
5.16E-13  
0.00389271  
0.00907443  
8.85E-09  
1.70E-05  
0.01960557  
0.00011999  
4.90E-08  
0.01897638  
0.00269294  
0.02733975  
0.03241995  
0.033338  
0.00051011  
0.02503706  
9.67E-11  
0.0473247  
0.00238811  
0.02764212  
0.03368682  
0.0035666  
0.00012645  
0.00578055  
0.03928119

0.00044902  
0.01644274  
0.01761728  
0.00180066  
2.80E-06  
0.00458565  
0.00018245  
0.00139087  
0.03607671  
0.00079686  
2.15E-05  
0.03591099  
0.02963152  
5.90E-06  
0.01568742  
0.00533659  
0.0003176  
4.55E-07  
0.00483971  
1.66E-11  
0.03046303  
1.88E-05  
0.00621108  
0.00281926  
0.01515232  
0.01141199  
0.01254884  
0.01173829  
8.07E-05  
0.02293676  
0.01178699  
0.04343331  
0.00097067  
0.00321435  
2.31E-12  
0.04166585  
0.00101899  
0.024152  
0.00013798  
0.0084645  
6.23E-06



0.02567576  
0.00908014  
0.00038626  
0.02988976  
5.87E-10  
4.86E-06  
0.00157679  
0.018862  
0.01375274  
0.03555074  
0.0155008  
6.56E-11  
0.00650134  
0.00772675  
3.29E-05  
0.01503686  
0.01018795  
0.02605453  
0.00015329  
3.52E-05  
5.50E-08  
3.01E-07  
0.0068918  
0.00883739  
0.02104752  
0.02206613  
9.96E-06  
7.50E-08  
0.00480712  
0.00098154  
0.02602569  
0.03310566  
9.43E-05  
0.02745395  
0.01474475  
0.03046303  
0.00491048  
0.00100598  
0.00030619  
0.00970467  
0.00138279

0.02801893  
0.0333748  
0.01043941  
0.00032347  
0.03762555  
0.01184794  
0.00260251  
0.00615571  
0.02909531  
0.00061684  
0.03959668  
0.02387222  
0.00560714  
0.03383824  
0.04037184  
0.02277571  
0.04371936  
0.00348144  
0.01768987  
0.00986953  
0.00288264  
0.02745639  
0.00096832  
0.00286005  
0.03046303  
0.0073033  
0.0002468  
0.04793582  
0.01304243  
1.25E-05  
0.00471548  
0.00950406  
0.01254555  
0.0266561  
3.08E-07  
0.00188839  
0.00401168  
7.84E-05  
0.0410665  
0.00900884  
0.00161695

7.57E-05  
0.01115492  
0.03033084  
3.05E-06  
0.01676642  
0.01731844  
0.00044283  
6.71E-05  
0.00062192  
0.00049835  
0.00107998  
0.04313863  
0.01998766  
4.20E-06  
0.00409749  
1.82E-07  
1.14E-05  
8.67E-05  
0.00179673  
0.00134345  
0.00410218  
1.16E-07  
0.03238815  
0.03356253  
0.0061022  
1.22E-07  
1.26E-07  
0.0456738  
0.02632446  
0.04499425  
0.00934176  
0.04613255  
0.03816533  
3.62E-06  
0.00444193  
0.01147362  
0.02530755  
3.04E-05  
0.00207142  
0.00073803  
0.00526517

3.90E-05  
2.78E-06  
0.03140127  
0.02147648  
1.40E-06  
0.00516894  
7.98E-06  
2.56E-06  
1.07E-06  
1.39E-06  
1.54E-06  
1.84E-05  
0.00035464  
0.00640695  
0.01384343  
6.84E-08  
4.54E-05  
0.00346871  
0.00010998  
0.00038549  
0.00130557  
0.03530934  
0.00066809  
6.58E-07  
0.02607174  
2.83E-08  
1.67E-08  
0.01944238  
0.00013067  
0.03809172  
0.00028941  
8.15E-07  
7.07E-09  
0.00045599  
0.033338  
0.01879056  
0.00760985  
0.0002468  
0.00814507  
0.03578681  
0.01302299

0.0002388  
1.44E-06  
0.01326825  
6.07E-09  
0.01335634  
4.45E-05  
0.00107871  
0.02007771  
3.72E-05  
0.00036229  
0.03241995  
0.02742137  
6.38E-05  
0.03014783  
0.01016153  
0.03659364  
0.04905813  
0.00024139  
0.0200988  
0.00225208  
0.03983525  
0.02630998  
0.01708609  
1.16E-13  
0.03807416  
0.02130302  
0.04042492  
0.00893692  
0.00374297  
0.01880926  
0.03241995  
0.00188375  
0.0487382  
0.04382086  
0.03341593  
0.00086523  
0.01956705  
0.0005136  
1.66E-06  
7.86E-11  
2.16E-07

0.00156711  
0.00955701  
0.02284901  
  9.33E-05  
  3.49E-08  
0.00035545  
  6.66E-05  
0.02184527  
  8.07E-05  
0.00239421  
0.00121294  
0.02168863  
  4.04E-06  
  6.43E-07  
0.02196904  
  0.00037  
  1.73E-07  
  1.96E-07  
  3.61E-05  
0.00028941  
  2.48E-05  
0.00012625  
0.00138494  
0.00215679  
0.00176761  
0.00531047  
0.00152387  
0.00389271  
0.00307027  
0.00916912  
0.00842219  
0.02039175  
0.03627493  
0.02240966  
0.04453426  
0.03554643  
0.00148613  
0.00128451  
0.00010553  
0.00034467  
0.01481457

6.78E-09  
1.79E-08  
0.00430189  
0.01624618  
0.04786085  
2.42E-09  
0.00029404  
0.0074442  
0.01903283  
0.01510286  
3.92E-06  
0.03683327  
0.01759479  
0.01712859  
1.63E-06  
0.04058937  
2.09E-08  
0.00192326  
0.00131085  
0.02680001  
3.54E-05  
0.00463552  
2.26E-05  
0.00180162  
0.01441074  
0.000701  
0.00087977  
0.00093111  
8.21E-06  
0.04951083  
9.06E-12  
4.08E-06  
7.71E-06  
0.04089766  
1.14E-08  
0.04058937  
2.26E-05  
0.00132747  
0.00018867  
0.02731808  
3.49E-13

5.49E-05  
0.01188881  
0.02240966  
0.01382976  
0.00875557  
0.02708763  
5.00E-09  
3.45E-05  
2.80E-07  
0.01239555  
0.00189014  
0.00019856  
0.00038619  
0.00036738  
0.01288768  
4.36E-05  
0.00014813  
0.01290087  
0.00291961  
8.38E-05  
0.00438749  
9.22E-08  
0.00028312  
1.63E-09  
0.01986305  
0.01671276  
0.00053102  
0.00050341  
0.04992609  
1.28E-08  
0.03023118  
0.0422095  
0.02646167  
0.00727708  
0.00025726  
0.00091155  
5.74E-05  
0.0477827  
0.00455626  
0.01154775  
0.00615571



8.67E-05  
0.00452693  
0.0015076  
0.00320374  
0.01211553  
0.00151968  
1.24E-12  
5.55E-06  
3.06E-07  
0.00110689  
0.00152983  
0.02125533  
0.0073033  
0.00480926  
0.01006044  
3.92E-06  
0.03948802  
0.01436359  
7.05E-07  
3.34E-06  
0.00516894  
2.21E-06  
0.00535927  
0.01035847  
5.47E-05  
0.002116  
6.51E-05  
3.18E-05  
0.03490765  
0.02649595  
0.01897638  
3.30E-09  
3.11E-06  
8.94E-12  
4.71E-09  
0.0006077  
5.03E-05  
0.03675929  
5.57E-13  
6.36E-05  
0.00121634

1.04E-08  
0.00871051  
0.02783225  
0.00746708  
0.01897638  
8.38E-07  
0.02848773  
0.00429051  
6.56E-05  
0.01461095  
0.00076623  
1.00E-11  
2.44E-05  
0.03086271  
0.02324771  
2.80E-09  
0.00489966  
0.00221221  
5.85E-05  
0.02440648  
6.78E-09  
0.01052424  
0.00123226  
2.43E-06  
0.00779475  
0.04770194  
2.48E-13  
0.00834651  
9.38E-05  
0.00038014  
0.00484787  
0.00566299  
0.04157784  
9.18E-05  
0.00022865  
4.84E-09  
0.00048418  
0.00012103  
0.04971152  
0.001253  
1.85E-06

2.80E-06  
0.00210758  
2.22E-06  
0.04505746  
0.00436851  
0.01765186  
0.00847717  
0.03952025  
4.63E-07  
0.01389769  
0.00292156  
0.00727915  
0.00474296  
0.00163326  
7.64E-06  
2.92E-05  
0.04759687  
0.00674352  
0.00029058  
0.00052429  
2.50E-06  
8.57E-06  
1.80E-08  
0.00022537  
8.35E-06  
0.01430953  
0.02532107  
0.04573793  
0.01229812  
1.14E-06  
0.00113648  
4.99E-10  
0.01394191  
5.95E-08  
0.0030312  
0.03364607  
0.00780571  
0.00858534  
0.01382976  
7.02E-06  
0.03332322

0.00026926  
5.17E-05  
2.15E-06  
0.0006077  
0.02173626  
2.95E-06  
0.0121669  
0.02380047  
0.00519979  
1.32E-19  
6.69E-12  
7.81E-10  
3.07E-09  
1.44E-10  
4.67E-16  
1.32E-09  
4.31E-10  
4.05E-09  
8.47E-10  
1.07E-08  
6.26E-08  
1.32E-11  
7.10E-07  
2.11E-09  
6.88E-08  
3.62E-10  
9.77E-06  
9.31E-05  
9.59E-06  
1.66E-05  
2.91E-05  
6.46E-06  
2.92E-08  
7.82E-05  
1.16E-07  
0.00012645  
7.91E-05  
0.00142737  
0.00216804  
0.00121166  
0.00085802

0.00604424  
0.00079471  
3.41E-05  
0.00085207  
0.00181549  
0.00129785  
0.00046181  
0.0047598  
0.00277764  
0.00177146  
0.00202627  
0.01159117  
0.01731844  
0.00613765  
0.01158888  
0.0264756  
0.01265468  
0.01012857  
0.04933788  
0.00026553  
0.00847717  
0.01375257  
0.0410665  
0.00043706  
0.03863685  
0.0241571  
0.01121397  
0.02156981  
0.03620647  
0.01432724  
0.03244178  
0.03552924  
0.04225643  
0.02109896  
0.03150282  
0.03701632  
0.01860966  
0.02240966  
0.02399709  
0.02356971  
0.02143619

0.04555168  
0.00036331  
0.02627343  
0.04742315  
0.04992809  
0.04971152  
0.00149334  
0.03121847  
0.00031252  
0.00480712  
0.02362262  
0.0001321  
0.00402708  
0.00584257  
0.01624618  
0.00363754  
0.00749486  
0.01727165  
0.01314461  
0.01554532  
0.00130592  
0.03810281  
0.03781143  
0.00568313  
0.00103926  
0.04837346  
0.00121294  
1.72E-09  
0.01761632  
0.00537678  
8.40E-05  
0.00484787  
2.80E-09  
0.00475872  
4.67E-16  
1.68E-07  
0.0003461  
2.13E-16  
8.20E-16  
1.54E-12  
1.28E-13

7.92E-11  
3.25E-11  
5.03E-12  
2.79E-12  
2.62E-12  
1.10E-11  
1.18E-10  
6.31E-11  
9.00E-09  
1.12E-09  
5.87E-10  
8.64E-07  
7.26E-09  
8.83E-07  
3.61E-06  
1.74E-07  
3.24E-06  
3.92E-06  
4.79E-06  
8.35E-06  
1.66E-06  
4.87E-05  
7.71E-06  
0.00026472  
3.38E-05  
2.35E-08  
0.00012121  
2.60E-07  
0.00042452  
0.00128414  
0.00012875  
0.0001284  
0.00017085  
0.00117508  
0.0002875  
4.42E-05  
0.00018119  
0.00147117  
0.00077297  
0.00044283  
0.00013438

0.00099733  
0.00054241  
0.00025912  
0.00036613  
0.00199203  
0.00290045  
0.00061715  
0.03415381  
0.00184398  
0.00542598  
0.00115204  
0.00196897  
0.00069951  
0.00212093  
0.00131085  
0.00553248  
0.002059  
0.0014079  
0.0056982  
0.00148955  
0.00135337  
0.00389598  
0.0387393  
0.00236441  
0.00671941  
0.00236841  
0.0094304  
0.00941211  
0.00488982  
0.00734547  
0.00165656  
0.00765968  
0.01299631  
0.02260225  
0.01248045  
0.01141199  
0.00604312  
0.02207463  
0.00625867  
0.01526372  
0.009251



0.00514507  
0.04240508  
0.01374802  
0.01049894  
0.00667087  
0.00410645  
0.01493105  
0.00970467  
0.01170596  
0.01825289  
0.03238871  
0.01254884  
0.04021932  
0.04470362  
0.01903283  
0.02356114  
0.02664447  
0.03010346  
0.03014783  
0.02582418  
0.02458479  
0.02822682  
0.02830069  
0.03356253  
0.0035666  
0.02240966  
0.0222696  
0.04580114  
0.03100572  
0.02702615  
0.02740375  
0.04298663  
0.03046303  
0.02838  
0.03959668  
0.03909372  
0.02038273  
0.00031897  
0.01671276  
0.02011888  
0.03322886

6.37E-08  
0.00576348  
0.02034964  
0.0229167  
0.00116908  
0.0102979  
0.01451747  
0.0138642  
0.00222619  
0.00518927  
0.02121115  
0.02579895  
0.0333479  
0.0072716  
0.01198586  
0.02293709  
0.03150282  
0.00722512  
3.25E-11  
0.00252631  
0.00032476  
0.00060623  
0.04573793  
2.18E-05  
0.04956986  
0.01150729  
0.00588394  
0.01176068  
2.68E-07  
0.00011367  
0.02408631  
0.00781973  
0.00915324  
0.00360917  
0.0037674  
0.006532  
1.07E-05  
0.00944006  
0.00154428  
0.00097332  
0.00870578

0.01768287  
0.01225845  
0.00580513  
0.00102273  
0.00366841  
0.00038463  
1.43E-05  
0.04032747  
0.00628925  
1.41E-05  
0.00148912  
7.71E-06  
0.0012654  
0.00488426  
0.0158731  
0.00032373  
0.0199245  
4.06E-06  
0.00021019  
0.00907443  
0.04343331  
0.00108095  
0.03632184  
0.01198586  
0.00130592  
0.00140783  
0.03932187  
0.00090228  
0.00986646  
0.00085423  
0.034058  
0.00180066  
0.00444449  
0.01680099  
5.43E-06  
0.0067898  
0.02031112  
0.01943822  
0.00116909  
0.04598501  
0.00506961

0.02531311  
0.00374297  
3.19E-06  
0.02929447  
0.02286336  
4.42E-05  
1.46E-05  
5.67E-05  
0.03053861  
0.02664192  
0.04533495  
0.00157496  
0.00034418  
0.03579746  
0.01849477  
0.00356139  
0.0215297  
0.01715122  
0.01675458  
0.021457  
2.67E-06  
0.02012985  
0.00479406  
0.01864322  
0.00011999  
0.00146553  
0.04316873  
8.91E-06  
0.00352618  
0.00197102  
0.00597276  
0.00087047  
2.93E-05  
0.03241995  
0.00907443  
1.53E-06  
0.0017317  
0.00164658  
2.53E-10  
0.03293515  
0.00188704

1.08E-07  
2.00E-10  
0.03150282  
0.02337359  
0.01512393  
0.01579021  
0.00139987  
3.09E-14  
0.00063103  
0.00166866  
0.00026859  
0.02111115  
1.74E-09  
3.90E-05  
0.00035004  
0.00011573  
2.66E-05  
0.03448567  
0.02858636  
0.01338449  
0.00316896  
4.44E-06  
6.92E-08  
0.00190461  
0.00024699  
1.25E-05  
0.00244294  
0.00130592  
0.0216915  
3.69E-05  
2.58E-06  
0.00011773  
0.02267026  
0.01648186  
0.00037349  
0.00337489  
1.03E-05  
0.00021024  
0.04160149  
1.46E-05  
0.01491329

2.31E-06  
0.04203474  
0.00037179  
0.01416899  
0.00463165  
0.02283739  
0.00665558  
0.01639166  
0.0036654  
0.02345974  
0.04388277  
0.00876826  
6.44E-10  
1.38E-08  
0.0020799  
0.02500344  
0.00527091  
5.27E-05  
0.02348953  
0.01059729  
0.00771826  
0.03950414  
0.00136928  
0.02745395  
0.02274344  
0.01932238  
0.01815557  
0.00183052  
0.01394191  
3.11E-08  
0.00872152  
0.00216372  
1.88E-05  
0.03758894  
0.00110763  
0.01563796  
4.57E-05  
0.02051634  
0.0026445  
0.04773768  
0.02230555

0.02445291  
0.00674352  
2.96E-06  
0.00011783  
0.03208263  
0.00017924  
0.01158888  
0.03426195  
0.00658381  
0.01682269  
0.02863792  
1.41E-07  
1.71E-05  
6.64E-07  
0.00823044  
4.52E-10  
0.00907074  
9.44E-12  
0.002734  
0.04472195  
0.02272512  
0.01570418  
0.01592762  
4.09E-07  
0.00013823  
0.0130103  
3.47E-05  
0.00038549  
0.00432233  
0.01806031  
0.00946347  
0.00011703  
1.85E-05  
0.01048127  
7.66E-06  
0.00396788  
0.00371756  
0.00642757  
0.00015793  
0.00189014  
0.00011843

0.0222696  
0.03822182  
0.00067528  
1.04E-05  
0.00150414  
0.00107998  
0.00630794  
0.00145538  
0.02779736  
0.01518638  
0.00208302  
0.02256078  
0.00442662  
0.0182958  
3.05E-06  
3.73E-08  
0.02718046  
0.04539988  
0.00147825  
0.00613588  
0.01121397  
0.01035947  
0.03131146  
0.00034781  
0.01928713  
0.00117487  
3.31E-11  
0.00190975  
0.03383824  
0.0002875  
0.04833083  
0.0411954  
6.65E-05  
0.00540739  
4.61E-09  
1.70E-05  
0.00600151  
0.01731844  
0.00148544  
0.00059241  
0.01569475



0.02039175  
0.02894002  
8.72E-06  
0.01312778  
8.13E-05  
0.00392328  
0.00086938  
1.08E-08  
0.00026926  
1.79E-08  
0.00066809  
0.00011843  
0.02888113  
1.05E-05  
0.04982176  
0.00048712  
0.0152017  
8.12E-06  
0.00053911  
0.03155105  
2.84E-05  
4.12E-05  
0.00018602  
3.08E-07  
0.0011755  
0.03128921  
6.36E-06  
0.00194181  
0.02240966  
0.01934572  
0.01943406  
4.27E-12  
0.03383824  
0.0139187  
0.00191261  
0.00039085  
1.87E-05  
0.00032125  
0.00079386  
1.61E-06  
0.00912767

0.00023792  
0.00266039  
0.00587759  
0.00028754  
0.0014991  
0.00283763  
0.000451  
0.0259387  
0.00099672  
5.38E-07  
0.0266561  
8.06E-11  
5.48E-05  
0.00534872  
0.00178474  
0.00560714  
0.01330867  
0.04786085  
0.04089978  
0.02156544  
0.00073657  
0.01613839  
3.22E-05  
0.00536503  
7.28E-05  
0.0220779  
0.03193046  
0.00189014  
0.0443598  
0.02504565  
0.00042845  
0.00935807  
0.00474296  
0.0222696  
5.17E-06  
0.01448079  
0.00338146  
0.00179961  
2.56E-10  
7.01E-07  
1.12E-05

0.03373411  
0.00024684  
0.03044531  
0.04437313  
  2.34E-06  
  2.93E-05  
  2.21E-06  
  0.011619  
0.03239218  
0.01290087  
0.00010139  
0.00570692  
  0.009703  
  9.28E-05  
  3.87E-06  
0.00215392  
  1.42E-05  
  4.73E-05  
0.02136244  
0.02656928  
0.02337359  
0.00168638  
0.00088796  
0.00532189  
0.00231313  
0.01825376  
0.00935807  
0.02908354  
  0.0020832  
0.01277864  
0.02249081  
0.01727165  
0.00224382  
  4.42E-12  
  0.0003877  
0.03306483  
0.04632911  
  7.65E-05  
0.04675193  
0.03383605  
0.01570418

0.00024305  
0.008535  
9.77E-06  
0.01176042  
0.03816954  
0.00088183  
0.03004217  
0.00196658  
0.00480316  
0.00478805  
0.01511571  
0.02392292  
0.03390913  
6.43E-05  
0.00385159  
0.0068918  
0.00371231  
0.01263287  
0.01568742  
0.02717869  
0.00133828  
0.00089503  
0.00278984  
0.00652218  
0.01700419  
0.01682269  
0.04643725  
0.0001775  
0.01349473  
6.71E-05  
0.00424615  
0.01436359  
0.01866002  
0.02740873  
0.00184357  
0.02206613  
0.00179961  
0.00670209  
2.93E-06  
0.01139249  
0.01751536

0.04097027  
8.74E-07  
0.00846289  
2.10E-05  
0.01348224  
0.02186669  
0.01651316  
0.01019989  
0.0001815  
0.00156641  
0.00099385  
0.01272017  
0.02311519  
2.40E-07  
0.03900988  
0.00071783  
0.00067243  
0.00028411  
0.00662709  
0.00117392  
1.46E-05  
1.97E-06  
1.17E-06  
0.02875017  
2.16E-09  
1.46E-05  
9.66E-06  
3.76E-06  
0.01680401  
4.48E-07  
9.55E-07  
0.01988859  
0.03225986  
0.03412045  
0.00011443  
0.00161707  
8.37E-05  
0.01498093  
7.79E-06  
0.01016153  
0.00053265

0.00038102  
3.01E-05  
0.04249235  
0.01937645  
0.0035666  
1.68E-07  
0.02748452  
4.79E-06  
0.0258558  
0.03525825  
0.00038549  
3.62E-05  
0.01198331  
2.96E-09  
0.00013771  
0.0001803  
0.00840343  
0.00338337  
0.02106326  
0.04125915  
0.01911037  
0.00521926  
1.83E-06  
0.00025037  
0.02277571  
0.02929447  
0.04494035
