# Supplementary material for: Developmental plasticity of epithelial stem cells in tooth and taste bud renewal
Source: PubMed Central journal article supplement — Proc Natl Acad Sci U S A. 2019 Aug 19;116(36):17858–66. doi: 10.1073/pnas.1821202116 (PMC6731641; doi:10.1073/pnas.1821202116), 2019-08-19
Supplement: pnas.1821202116.sd02.pdf [file pnas.1821202116.sd02.pdf]

| Human Ort | Cichlid_Gel | Tissue | Description                                                                                            |
|-----------|-------------|--------|--------------------------------------------------------------------------------------------------------|
| ACP5      | LOC101478   | RT     | acid phosphatase 5, tartrate resistant [Source:HGNC Symbol;Acc:124]                                    |
| ACP5      | LOC101484   | TB     | acid phosphatase 5, tartrate resistant [Source:HGNC Symbol;Acc:124]                                    |
| ACTB      | LOC101464   | RT     | actin, beta [Source:HGNC Symbol;Acc:132]                                                               |
| ACTB      | LOC101476   | TB     | actin, beta [Source:HGNC Symbol;Acc:132]                                                               |
| ACVR1     | acvr1       | RT     | activin A receptor, type I [Source:HGNC Symbol;Acc:171]                                                |
| ACVR1     | LOC101467   | TB     | activin A receptor, type I [Source:HGNC Symbol;Acc:171]                                                |
| ADH4      | LOC101485   | RT     | alcohol dehydrogenase 4 (class II), pi polypeptide [Source:HGNC Symbol;Acc:252]                        |
| ADH4      | LOC101464   | TB     | alcohol dehydrogenase 4 (class II), pi polypeptide [Source:HGNC Symbol;Acc:252]                        |
| AIMP1     | LOC101475   | RT     | aminoacyl tRNA synthetase complex-interacting multifunctional protein 1 [Source:HGNC Symbol;Acc:26545] |
| AIMP1     | aimp1       | TB     | aminoacyl tRNA synthetase complex-interacting multifunctional protein 1 [Source:HGNC Symbol;Acc:26545] |
| ARHGAP42  | LOC101483   | RT     | Rho GTPase activating protein 42 [Source:HGNC Symbol;Acc:26545]                                        |
| ARHGAP42  | arhgap42    | TB     | Rho GTPase activating protein 42 [Source:HGNC Symbol;Acc:26545]                                        |
| ARHGEF19  | LOC101463   | RT     | Rho guanine nucleotide exchange factor (GEF) 19 [Source:HGNC Symbol;Acc:26545]                         |
| ARHGEF19  | LOC101485   | TB     | Rho guanine nucleotide exchange factor (GEF) 19 [Source:HGNC Symbol;Acc:26545]                         |
| ARL5B     | arl5b       | RT     | ADP-ribosylation factor-like 5B [Source:HGNC Symbol;Acc:23052]                                         |
| ARL5B     | nrap        | TB     | ADP-ribosylation factor-like 5B [Source:HGNC Symbol;Acc:23052]                                         |
| ASTL      | LOC101481   | RT     | astacin-like metallo-endopeptidase (M12 family) [Source:HGNC Symbol;Acc:317]                           |
| ASTL      | LOC101482   | RT     | astacin-like metallo-endopeptidase (M12 family) [Source:HGNC Symbol;Acc:317]                           |
| ASTL      | LOC101485   | TB     | astacin-like metallo-endopeptidase (M12 family) [Source:HGNC Symbol;Acc:317]                           |
| B4GALT1   | b4galt1     | RT     | UDP-Gal:betaGlcNAc beta 1,4- galactosyltransferase, polypeptide 1 [Source:HGNC Symbol;Acc:17208]       |
| B4GALT1   | LOC101486   | TB     | UDP-Gal:betaGlcNAc beta 1,4- galactosyltransferase, polypeptide 1 [Source:HGNC Symbol;Acc:17208]       |
| BICD2     | LOC101464   | RT     | bicaudal D homolog 2 (Drosophila) [Source:HGNC Symbol;Acc:17208]                                       |
| BICD2     | LOC101487   | TB     | bicaudal D homolog 2 (Drosophila) [Source:HGNC Symbol;Acc:17208]                                       |
| BICD2     | LOC101465   | TB     | bicaudal D homolog 2 (Drosophila) [Source:HGNC Symbol;Acc:17208]                                       |
| BTBD6     | LOC101483   | RT     | BTB (POZ) domain containing 6 [Source:HGNC Symbol;Acc:19897]                                           |
| BTBD6     | LOC101481   | TB     | BTB (POZ) domain containing 6 [Source:HGNC Symbol;Acc:19897]                                           |
| CABP4     | LOC101466   | RT     | calcium binding protein 4 [Source:HGNC Symbol;Acc:1386]                                                |
| CABP4     | LOC101475   | TB     | calcium binding protein 4 [Source:HGNC Symbol;Acc:1386]                                                |
| CCL19     | LOC101467   | RT     | chemokine (C-C motif) ligand 19 [Source:HGNC Symbol;Acc:10617]                                         |
| CCL19     | LOC101467   | TB     | chemokine (C-C motif) ligand 19 [Source:HGNC Symbol;Acc:10617]                                         |
| CD22      | LOC101474   | RT     | CD22 molecule [Source:HGNC Symbol;Acc:1643]                                                            |
| CD22      | LOC106674   | TB     | CD22 molecule [Source:HGNC Symbol;Acc:1643]                                                            |
| CD22      | LOC101486   | TB     | CD22 molecule [Source:HGNC Symbol;Acc:1643]                                                            |
| CD276     | cd276       | RT     | CD276 molecule [Source:HGNC Symbol;Acc:19137]                                                          |
| CD276     | LOC106675   | TB     | CD276 molecule [Source:HGNC Symbol;Acc:19137]                                                          |
| CD86      | LOC101467   | RT     | CD86 molecule [Source:HGNC Symbol;Acc:1705]                                                            |
| CD86      | LOC101486   | RT     | CD86 molecule [Source:HGNC Symbol;Acc:1705]                                                            |
| CD86      | LOC106676   | RT     | CD86 molecule [Source:HGNC Symbol;Acc:1705]                                                            |
| CD86      | LOC101485   | TB     | CD86 molecule [Source:HGNC Symbol;Acc:1705]                                                            |
| CD86      | LOC106676   | TB     | CD86 molecule [Source:HGNC Symbol;Acc:1705]                                                            |
| CD86      | LOC101486   | TB     | CD86 molecule [Source:HGNC Symbol;Acc:1705]                                                            |
| CD86      | LOC106674   | TB     | CD86 molecule [Source:HGNC Symbol;Acc:1705]                                                            |
| CD86      | LOC101486   | TB     | CD86 molecule [Source:HGNC Symbol;Acc:1705]                                                            |
| CD86      | LOC106676   | TB     | CD86 molecule [Source:HGNC Symbol;Acc:1705]                                                            |
| CD86      | LOC101467   | TB     | CD86 molecule [Source:HGNC Symbol;Acc:1705]                                                            |
| CERK      | LOC101484   | RT     | ceramide kinase [Source:HGNC Symbol;Acc:19256]                                                         |

|         |           |    |                                                                                     |
|---------|-----------|----|-------------------------------------------------------------------------------------|
| CERK    | LOC101474 | TB | ceramide kinase [Source:HGNC Symbol;Acc:19256]                                      |
| CGNL1   | LOC101478 | RT | cingulin-like 1 [Source:HGNC Symbol;Acc:25931]                                      |
| CGNL1   | LOC101478 | TB | cingulin-like 1 [Source:HGNC Symbol;Acc:25931]                                      |
| CLDN7   | LOC101477 | RT | claudin 7 [Source:HGNC Symbol;Acc:2049]                                             |
| CLDN7   | LOC101476 | TB | claudin 7 [Source:HGNC Symbol;Acc:2049]                                             |
| CLDN8   | LOC101476 | RT | claudin 8 [Source:HGNC Symbol;Acc:2050]                                             |
| CLDN8   | LOC101475 | TB | claudin 8 [Source:HGNC Symbol;Acc:2050]                                             |
| CLDN8   | LOC101464 | TB | claudin 8 [Source:HGNC Symbol;Acc:2050]                                             |
| CLDN8   | LOC101476 | TB | claudin 8 [Source:HGNC Symbol;Acc:2050]                                             |
| CLDN8   | LOC101475 | TB | claudin 8 [Source:HGNC Symbol;Acc:2050]                                             |
| CLDN8   | LOC101466 | TB | claudin 8 [Source:HGNC Symbol;Acc:2050]                                             |
| CLDN8   | LOC101480 | TB | claudin 8 [Source:HGNC Symbol;Acc:2050]                                             |
| CLMP    | clmp      | RT | CXADR-like membrane protein [Source:HGNC Symbol;Acc:24039]                          |
| CLMP    | LOC106675 | TB | CXADR-like membrane protein [Source:HGNC Symbol;Acc:24039]                          |
| CLUL1   | clul1     | RT | clusterin-like 1 (retinal) [Source:HGNC Symbol;Acc:2096]                            |
| CLUL1   | LOC101479 | TB | clusterin-like 1 (retinal) [Source:HGNC Symbol;Acc:2096]                            |
| CNGA3   | LOC101470 | RT | cyclic nucleotide gated channel alpha 3 [Source:HGNC Symbol;Acc:2150]               |
| CNGA3   | LOC105940 | TB | cyclic nucleotide gated channel alpha 3 [Source:HGNC Symbol;Acc:2150]               |
| COL19A1 | col16a1   | RT | collagen, type XIX, alpha 1 [Source:HGNC Symbol;Acc:2196]                           |
| COL19A1 | col19a1   | TB | collagen, type XIX, alpha 1 [Source:HGNC Symbol;Acc:2196]                           |
| CR1L    | LOC101465 | RT | complement component (3b/4b) receptor 1-like [Source:HGNC Symbol;Acc:2331]          |
| CR1L    | LOC101477 | TB | complement component (3b/4b) receptor 1-like [Source:HGNC Symbol;Acc:2331]          |
| CRIP2   | LOC101465 | RT | cysteine-rich protein 2 [Source:HGNC Symbol;Acc:2361]                               |
| CRIP2   | LOC101471 | TB | cysteine-rich protein 2 [Source:HGNC Symbol;Acc:2361]                               |
| CRIP2   | crip1     | TB | cysteine-rich protein 2 [Source:HGNC Symbol;Acc:2361]                               |
| CRY1    | LOC101475 | RT | cryptochrome 1 (photolyase-like) [Source:HGNC Symbol;Acc:2384]                      |
| CRY1    | LOC101480 | TB | cryptochrome 1 (photolyase-like) [Source:HGNC Symbol;Acc:2384]                      |
| CTSS    | LOC101480 | RT | cathepsin S [Source:HGNC Symbol;Acc:2545]                                           |
| CTSS    | LOC101485 | TB | cathepsin S [Source:HGNC Symbol;Acc:2545]                                           |
| CYP1A1  | LOC101465 | RT | cytochrome P450, family 1, subfamily A, polypeptide 1 [Source:HGNC Symbol;Acc:9504] |
| CYP1A1  | LOC101472 | TB | cytochrome P450, family 1, subfamily A, polypeptide 1 [Source:HGNC Symbol;Acc:9504] |
| CYTH3   | LOC101486 | RT | cytohesin 3 [Source:HGNC Symbol;Acc:9504]                                           |
| CYTH3   | cyth3     | TB | cytohesin 3 [Source:HGNC Symbol;Acc:9504]                                           |
| DAB2IP  | dab2ip    | RT | DAB2 interacting protein [Source:HGNC Symbol;Acc:17294]                             |
| DAB2IP  | LOC101464 | TB | DAB2 interacting protein [Source:HGNC Symbol;Acc:17294]                             |
| DBNL    | dbnl      | RT | drebrin-like [Source:HGNC Symbol;Acc:2696]                                          |
| DBNL    | LOC101468 | TB | drebrin-like [Source:HGNC Symbol;Acc:2696]                                          |
| DENND1A | LOC101481 | RT | DENN/MADD domain containing 1A [Source:HGNC Symbol;Acc:29324]                       |
| DENND1A | LOC101480 | TB | DENN/MADD domain containing 1A [Source:HGNC Symbol;Acc:29324]                       |
| DUSP10  | dusp10    | RT | dual specificity phosphatase 10 [Source:HGNC Symbol;Acc:3065]                       |
| DUSP10  | LOC101468 | TB | dual specificity phosphatase 10 [Source:HGNC Symbol;Acc:3065]                       |
| EGR3    | egr3      | RT | early growth response 3 [Source:HGNC Symbol;Acc:3240]                               |
| EGR3    | LOC101482 | TB | early growth response 3 [Source:HGNC Symbol;Acc:3240]                               |
| ELL     | ell3      | RT | elongation factor RNA polymerase II [Source:HGNC Symbol;Acc:23114]                  |
| ELL     | LOC101472 | TB | elongation factor RNA polymerase II [Source:HGNC Symbol;Acc:23114]                  |
| ELOVL1  | LOC101477 | RT | ELOVL fatty acid elongase 1 [Source:HGNC Symbol;Acc:14418]                          |
| ELOVL1  | LOC101481 | TB | ELOVL fatty acid elongase 1 [Source:HGNC Symbol;Acc:14418]                          |

|         |           |    |                                                                                                                                                       |
|---------|-----------|----|-------------------------------------------------------------------------------------------------------------------------------------------------------|
| EVA1C   | eva1a     | RT | eva-1 homolog C ( <i>C. elegans</i> ) [Source:HGNC Symbol;Acc:13239]                                                                                  |
| EVA1C   | LOC101470 | TB | eva-1 homolog C ( <i>C. elegans</i> ) [Source:HGNC Symbol;Acc:13239]                                                                                  |
| FAM109A | fam109a   | RT | family with sequence similarity 109, member A [Source:HGNC Symbol;Acc:2650]                                                                           |
| FAM109A | LOC101481 | TB | family with sequence similarity 109, member A [Source:HGNC Symbol;Acc:2650]                                                                           |
| FAM117A | LOC101484 | RT | family with sequence similarity 117, member A [Source:HGNC Symbol;Acc:2417]                                                                           |
| FAM117A | fam117a   | TB | family with sequence similarity 117, member A [Source:HGNC Symbol;Acc:2417]                                                                           |
| FGD4    | LOC101484 | RT | FYVE, RhoGEF and PH domain containing 4 [Source:HGNC Symbol;Acc:19125]                                                                                |
| FGD4    | fgd4      | TB | FYVE, RhoGEF and PH domain containing 4 [Source:HGNC Symbol;Acc:19125]                                                                                |
| GALNT8  | galnt8    | RT | UDP-N-acetyl-alpha-D-galactosamine:polypeptide N-acetylgalactosaminyltransferase                                                                      |
| GALNT8  | LOC105941 | TB | UDP-N-acetyl-alpha-D-galactosamine:polypeptide N-acetylgalactosaminyltransferase                                                                      |
| GGH     | LOC101480 | RT | gamma-glutamyl hydrolase (conjugase, folylpolyglammaglutamyl hydrolase) [Source:HGNC Symbol;Acc:21872]                                                |
| GGH     | LOC101473 | TB | gamma-glutamyl hydrolase (conjugase, folylpolyglammaglutamyl hydrolase) [Source:HGNC Symbol;Acc:21872]                                                |
| GID4    | LOC101474 | RT | GID complex subunit 4, VID24 homolog ( <i>S. cerevisiae</i> ) [Source:HGNC Symbol;Acc:21872]                                                          |
| GID4    | gid4      | TB | GID complex subunit 4, VID24 homolog ( <i>S. cerevisiae</i> ) [Source:HGNC Symbol;Acc:21872]                                                          |
| GIMAP4  | LOC101474 | RT | GTPase, IMAP family member 4 [Source:HGNC Symbol;Acc:21872]                                                                                           |
| GIMAP4  | LOC101488 | TB | GTPase, IMAP family member 4 [Source:HGNC Symbol;Acc:21872]                                                                                           |
| GIMAP4  | LOC101470 | TB | GTPase, IMAP family member 4 [Source:HGNC Symbol;Acc:21872]                                                                                           |
| GIMAP4  | LOC101480 | TB | GTPase, IMAP family member 4 [Source:HGNC Symbol;Acc:21872]                                                                                           |
| GIMAP4  | LOC101470 | TB | GTPase, IMAP family member 4 [Source:HGNC Symbol;Acc:21872]                                                                                           |
| GIMAP4  | LOC101466 | TB | GTPase, IMAP family member 4 [Source:HGNC Symbol;Acc:21872]                                                                                           |
| GIMAP4  | LOC101482 | TB | GTPase, IMAP family member 4 [Source:HGNC Symbol;Acc:21872]                                                                                           |
| GIMAP4  | LOC101473 | TB | GTPase, IMAP family member 4 [Source:HGNC Symbol;Acc:21872]                                                                                           |
| GIMAP4  | LOC106676 | TB | GTPase, IMAP family member 4 [Source:HGNC Symbol;Acc:21872]                                                                                           |
| GIMAP4  | LOC101473 | TB | GTPase, IMAP family member 4 [Source:HGNC Symbol;Acc:21872]                                                                                           |
| GIMAP4  | LOC101479 | TB | GTPase, IMAP family member 4 [Source:HGNC Symbol;Acc:21872]                                                                                           |
| GIMAP4  | LOC105940 | TB | GTPase, IMAP family member 4 [Source:HGNC Symbol;Acc:21872]                                                                                           |
| GIMAP4  | LOC101472 | TB | GTPase, IMAP family member 4 [Source:HGNC Symbol;Acc:21872]                                                                                           |
| GIMAP4  | LOC101482 | TB | GTPase, IMAP family member 4 [Source:HGNC Symbol;Acc:21872]                                                                                           |
| GIMAP4  | LOC101483 | TB | GTPase, IMAP family member 4 [Source:HGNC Symbol;Acc:21872]                                                                                           |
| GIMAP4  | LOC101473 | TB | GTPase, IMAP family member 4 [Source:HGNC Symbol;Acc:21872]                                                                                           |
| GIMAP4  | LOC101468 | TB | GTPase, IMAP family member 4 [Source:HGNC Symbol;Acc:21872]                                                                                           |
| GIMAP4  | LOC101465 | TB | GTPase, IMAP family member 4 [Source:HGNC Symbol;Acc:21872]                                                                                           |
| GIMAP4  | LOC106674 | TB | GTPase, IMAP family member 4 [Source:HGNC Symbol;Acc:21872]                                                                                           |
| GLUD1   | LOC101468 | RT | glutamate dehydrogenase 1 [Source:HGNC Symbol;Acc:4335]                                                                                               |
| GLUD1   | glud1     | TB | glutamate dehydrogenase 1 [Source:HGNC Symbol;Acc:4335]                                                                                               |
| GLUL    | LOC101471 | RT | glutamate-ammonia ligase [Source:HGNC Symbol;Acc:4341]                                                                                                |
| GLUL    | LOC101478 | TB | glutamate-ammonia ligase [Source:HGNC Symbol;Acc:4341]                                                                                                |
| GNAO1   | LOC101483 | RT | guanine nucleotide binding protein (G protein), alpha activating activity polypeptide                                                                 |
| GNAO1   | LOC101483 | TB | guanine nucleotide binding protein (G protein), alpha activating activity polypeptide                                                                 |
| GPC5    | gpc5      | RT | glypican 5 [Source:HGNC Symbol;Acc:4453]                                                                                                              |
| GPC5    | LOC101466 | RT | glypican 5 [Source:HGNC Symbol;Acc:4453]                                                                                                              |
| GPC5    | LOC101465 | TB | glypican 5 [Source:HGNC Symbol;Acc:4453]                                                                                                              |
| GPR101  | LOC101465 | RT | G protein-coupled receptor 101 [Source:HGNC Symbol;Acc:14963]                                                                                         |
| GPR101  | gpr101    | TB | G protein-coupled receptor 101 [Source:HGNC Symbol;Acc:14963]                                                                                         |
| GRB10   | LOC101472 | RT | growth factor receptor-bound protein 10 [Source:HGNC Symbol;Acc:4564]                                                                                 |
| GRB10   | LOC101472 | TB | growth factor receptor-bound protein 10 [Source:HGNC Symbol;Acc:4564]                                                                                 |
| GRINA   | LOC101487 | RT | glutamate receptor, ionotropic, N-methyl D-aspartate-associated protein 1 (glutamate receptor, ionotropic, N-methyl D-aspartate-associated protein 1) |

|          |           |    |                                                                                   |
|----------|-----------|----|-----------------------------------------------------------------------------------|
| GRINA    | LOC101468 | TB | glutamate receptor, ionotropic, N-methyl D-aspartate-associated protein 1 (glut   |
| GSN      | LOC101472 | RT | gelsolin [Source:HGNC Symbol;Acc:4620]                                            |
| GSN      | LOC101487 | TB | gelsolin [Source:HGNC Symbol;Acc:4620]                                            |
| HPN      | hpn       | RT | hepsin [Source:HGNC Symbol;Acc:5155]                                              |
| HPN      | tmprss9   | TB | hepsin [Source:HGNC Symbol;Acc:5155]                                              |
| IFI30    | LOC101483 | RT | interferon, gamma-inducible protein 30 [Source:HGNC Symbol;Acc:5398]              |
| IFI30    | LOC101486 | TB | interferon, gamma-inducible protein 30 [Source:HGNC Symbol;Acc:5398]              |
| IL13RA1  | LOC101468 | RT | interleukin 13 receptor, alpha 1 [Source:HGNC Symbol;Acc:5974]                    |
| IL13RA1  | LOC101468 | TB | interleukin 13 receptor, alpha 1 [Source:HGNC Symbol;Acc:5974]                    |
| IL20RA   | LOC101482 | RT | interleukin 20 receptor, alpha [Source:HGNC Symbol;Acc:6003]                      |
| IL20RA   | LOC101463 | TB | interleukin 20 receptor, alpha [Source:HGNC Symbol;Acc:6003]                      |
| IRS2     | LOC101465 | RT | insulin receptor substrate 2 [Source:HGNC Symbol;Acc:6126]                        |
| IRS2     | LOC101482 | TB | insulin receptor substrate 2 [Source:HGNC Symbol;Acc:6126]                        |
| ITSN2    | LOC101467 | RT | intersectin 2 [Source:HGNC Symbol;Acc:6184]                                       |
| ITSN2    | LOC101476 | TB | intersectin 2 [Source:HGNC Symbol;Acc:6184]                                       |
| KAL1     | LOC101474 | RT | Kallmann syndrome 1 sequence [Source:HGNC Symbol;Acc:6211]                        |
| KAL1     | anos1     | TB | Kallmann syndrome 1 sequence [Source:HGNC Symbol;Acc:6211]                        |
| KIAA1211 | kiaa1211l | RT | KIAA1211 [Source:HGNC Symbol;Acc:29219]                                           |
| KIAA1211 | kiaa1211  | TB | KIAA1211 [Source:HGNC Symbol;Acc:29219]                                           |
| KIF13B   | LOC101473 | RT | kinesin family member 13B [Source:HGNC Symbol;Acc:14405]                          |
| KIF13B   | LOC101482 | TB | kinesin family member 13B [Source:HGNC Symbol;Acc:14405]                          |
| KRT84    | LOC101470 | RT | keratin 84 [Source:HGNC Symbol;Acc:6461]                                          |
| KRT84    | LOC101470 | RT | keratin 84 [Source:HGNC Symbol;Acc:6461]                                          |
| KRT84    | LOC101485 | TB | keratin 84 [Source:HGNC Symbol;Acc:6461]                                          |
| KRT84    | LOC101486 | TB | keratin 84 [Source:HGNC Symbol;Acc:6461]                                          |
| LBH      | lbh       | RT | limb bud and heart development [Source:HGNC Symbol;Acc:29532]                     |
| LBH      | LOC106675 | TB | limb bud and heart development [Source:HGNC Symbol;Acc:29532]                     |
| LIMCH1   | LOC101483 | RT | LIM and calponin homology domains 1 [Source:HGNC Symbol;Acc:29191]                |
| LIMCH1   | lmo7      | TB | LIM and calponin homology domains 1 [Source:HGNC Symbol;Acc:29191]                |
| LRRC70   | LOC101478 | RT | leucine rich repeat containing 70 [Source:HGNC Symbol;Acc:35155]                  |
| LRRC70   | tril      | RT | leucine rich repeat containing 70 [Source:HGNC Symbol;Acc:35155]                  |
| LRRC70   | gp1bb     | TB | leucine rich repeat containing 70 [Source:HGNC Symbol;Acc:35155]                  |
| MYOF     | myof      | RT | myoferlin [Source:HGNC Symbol;Acc:3656]                                           |
| MYOF     | LOC101468 | TB | myoferlin [Source:HGNC Symbol;Acc:3656]                                           |
| NPHS1    | LOC101478 | RT | nephrosis 1, congenital, Finnish type (nephrin) [Source:HGNC Symbol;Acc:7908]     |
| NPHS1    | LOC101474 | TB | nephrosis 1, congenital, Finnish type (nephrin) [Source:HGNC Symbol;Acc:7908]     |
| NPR2     | LOC101476 | RT | natriuretic peptide receptor B/guanylate cyclase B (atrionatriuretic peptide rece |
| NPR2     | LOC101463 | TB | natriuretic peptide receptor B/guanylate cyclase B (atrionatriuretic peptide rece |
| NPR2     | LOC101465 | TB | natriuretic peptide receptor B/guanylate cyclase B (atrionatriuretic peptide rece |
| NPR2     | LOC101478 | TB | natriuretic peptide receptor B/guanylate cyclase B (atrionatriuretic peptide rece |
| OXS1     | LOC101476 | RT | oxidative-stress responsive 1 [Source:HGNC Symbol;Acc:8508]                       |
| OXS1     | LOC101471 | TB | oxidative-stress responsive 1 [Source:HGNC Symbol;Acc:8508]                       |
| PACSIN3  | LOC101478 | RT | protein kinase C and casein kinase substrate in neurons 3 [Source:HGNC Symbol     |
| PACSIN3  | pacsin3   | TB | protein kinase C and casein kinase substrate in neurons 3 [Source:HGNC Symbol     |
| PARP12   | LOC101482 | RT | poly (ADP-ribose) polymerase family, member 12 [Source:HGNC Symbol;Acc:219        |
| PARP12   | LOC106674 | TB | poly (ADP-ribose) polymerase family, member 12 [Source:HGNC Symbol;Acc:219        |
| PGBD4    | LOC101463 | RT | piggyBac transposable element derived 4 [Source:HGNC Symbol;Acc:19401]            |



|          |           |    |                                                                                |
|----------|-----------|----|--------------------------------------------------------------------------------|
| SLC6A12  | LOC101464 | TB | solute carrier family 6 (neurotransmitter transporter, betaine/GABA), member 1 |
| SPAG9    | spag9     | RT | sperm associated antigen 9 [Source:HGNC Symbol;Acc:14524]                      |
| SPAG9    | LOC101483 | TB | sperm associated antigen 9 [Source:HGNC Symbol;Acc:14524]                      |
| SSC5D    | LOC101467 | RT | scavenger receptor cysteine rich domain containing (5 domains) [Source:HGNC S  |
| SSC5D    | LOC101479 | RT | scavenger receptor cysteine rich domain containing (5 domains) [Source:HGNC S  |
| SSC5D    | LOC101480 | TB | scavenger receptor cysteine rich domain containing (5 domains) [Source:HGNC S  |
| SULT1E1  | LOC101479 | RT | sulfotransferase family 1E, estrogen-preferring, member 1 [Source:HGNC Symb    |
| SULT1E1  | LOC101476 | TB | sulfotransferase family 1E, estrogen-preferring, member 1 [Source:HGNC Symb    |
| SVOP     | LOC101465 | RT | SV2 related protein homolog (rat) [Source:HGNC Symbol;Acc:25417]               |
| SVOP     | svop      | TB | SV2 related protein homolog (rat) [Source:HGNC Symbol;Acc:25417]               |
| TGFBRAP1 | LOC101467 | RT | transforming growth factor, beta receptor associated protein 1 [Source:HGNC S  |
| TGFBRAP1 | tgfbap1   | TB | transforming growth factor, beta receptor associated protein 1 [Source:HGNC S  |
| TMEM57   | LOC101480 | RT | transmembrane protein 57 [Source:HGNC Symbol;Acc:25572]                        |
| TMEM57   | tmem57    | TB | transmembrane protein 57 [Source:HGNC Symbol;Acc:25572]                        |
| TNNT2    | LOC101480 | RT | troponin T type 2 (cardiac) [Source:HGNC Symbol;Acc:11949]                     |
| TNNT2    | LOC101474 | TB | troponin T type 2 (cardiac) [Source:HGNC Symbol;Acc:11949]                     |
| TPM2     | tpm1      | RT | tropomyosin 2 (beta) [Source:HGNC Symbol;Acc:12011]                            |
| TPM2     | LOC101474 | TB | tropomyosin 2 (beta) [Source:HGNC Symbol;Acc:12011]                            |
| TRIM25   | LOC101469 | RT | tripartite motif containing 25 [Source:HGNC Symbol;Acc:12932]                  |
| TRIM25   | LOC101466 | RT | tripartite motif containing 25 [Source:HGNC Symbol;Acc:12932]                  |
| TRIM25   | LOC101474 | TB | tripartite motif containing 25 [Source:HGNC Symbol;Acc:12932]                  |
| TRIM25   | LOC101478 | TB | tripartite motif containing 25 [Source:HGNC Symbol;Acc:12932]                  |
| TRIM25   | LOC101481 | TB | tripartite motif containing 25 [Source:HGNC Symbol;Acc:12932]                  |
| TRIM25   | LOC101475 | TB | tripartite motif containing 25 [Source:HGNC Symbol;Acc:12932]                  |
| TRIM25   | LOC101470 | TB | tripartite motif containing 25 [Source:HGNC Symbol;Acc:12932]                  |
| TRIM25   | LOC106675 | TB | tripartite motif containing 25 [Source:HGNC Symbol;Acc:12932]                  |
| TRIP10   | LOC101486 | RT | thyroid hormone receptor interactor 10 [Source:HGNC Symbol;Acc:12304]          |
| TRIP10   | trip10    | TB | thyroid hormone receptor interactor 10 [Source:HGNC Symbol;Acc:12304]          |
| TSPAN16  | LOC101486 | RT | tetraspanin 16 [Source:HGNC Symbol;Acc:30725]                                  |
| TSPAN16  | LOC101476 | TB | tetraspanin 16 [Source:HGNC Symbol;Acc:30725]                                  |
| TUBA8    | LOC101484 | RT | tubulin, alpha 8 [Source:HGNC Symbol;Acc:12410]                                |
| TUBA8    | LOC101486 | TB | tubulin, alpha 8 [Source:HGNC Symbol;Acc:12410]                                |
| TUBA8    | LOC101475 | TB | tubulin, alpha 8 [Source:HGNC Symbol;Acc:12410]                                |
| UBE2G1   | LOC101477 | RT | ubiquitin-conjugating enzyme E2G 1 [Source:HGNC Symbol;Acc:12482]              |
| UBE2G1   | LOC101476 | TB | ubiquitin-conjugating enzyme E2G 1 [Source:HGNC Symbol;Acc:12482]              |
| XKR8     | LOC101476 | RT | XK, Kell blood group complex subunit-related family, member 8 [Source:HGNC S   |
| XKR8     | LOC106675 | TB | XK, Kell blood group complex subunit-related family, member 8 [Source:HGNC S   |
| ZFP36    | LOC101477 | RT | ZFP36 ring finger protein [Source:HGNC Symbol;Acc:12862]                       |
| ZFP36    | LOC101487 | TB | ZFP36 ring finger protein [Source:HGNC Symbol;Acc:12862]                       |
| ZNF502   | LOC101471 | RT | zinc finger protein 502 [Source:HGNC Symbol;Acc:23718]                         |
| ZNF502   | LOC101471 | TB | zinc finger protein 502 [Source:HGNC Symbol;Acc:23718]                         |
| ZNF502   | LOC101478 | TB | zinc finger protein 502 [Source:HGNC Symbol;Acc:23718]                         |
| ZNF706   | LOC101473 | RT | zinc finger protein 706 [Source:HGNC Symbol;Acc:24992]                         |
| ZNF706   | LOC101472 | TB | zinc finger protein 706 [Source:HGNC Symbol;Acc:24992]                         |

2]

2]

ce:HGNC Symbol;Acc:10648]

ce:HGNC Symbol;Acc:10648]

504]

504]

04]

04]

04]

√C Symbol;Acc:924]

√C Symbol;Acc:924]

5]  
5]

cc:2595]  
cc:2595]



9]

9]

9]

9]

erase 8 (GalNAc-T8) [Source:HGNC Symbol;Acc:4130]

erase 8 (GalNAc-T8) [Source:HGNC Symbol;Acc:4130]

urce:HGNC Symbol;Acc:4248]

urce:HGNC Symbol;Acc:4248]

c:28453]

c:28453]

ptide O [Source:HGNC Symbol;Acc:4389]

ptide O [Source:HGNC Symbol;Acc:4389]

:amate binding) [Source:HGNC Symbol;Acc:4589]

:amate binding) [Source:HGNC Symbol;Acc:4589]

:ptor B) [Source:HGNC Symbol;Acc:7944]

:ptor B) [Source:HGNC Symbol;Acc:7944]

:ptor B) [Source:HGNC Symbol;Acc:7944]

:ptor B) [Source:HGNC Symbol;Acc:7944]

;Acc:8572]

;Acc:8572]

919]

919]

\acc:8979]  
\acc:8979]

cc:9282]  
cc:9282]

:c:20635]  
:c:20635]

|  
|

mbol;Acc:13433]  
mbol;Acc:13433]

hort cytoplasmic domain, (semaphorin) 4F [Source:HGNC Symbol;Acc:10734]  
hort cytoplasmic domain, (semaphorin) 4F [Source:HGNC Symbol;Acc:10734]  
hort cytoplasmic domain, (semaphorin) 4F [Source:HGNC Symbol;Acc:10734]

3]  
3]  
HGNC Symbol;Acc:10927]  
HGNC Symbol;Acc:10927]  
ymbol;Acc:8494]  
ymbol;Acc:8494]  
ymbol;Acc:8494]  
L2 [Source:HGNC Symbol;Acc:11045]  
L2 [Source:HGNC Symbol;Acc:11045]  
L2 [Source:HGNC Symbol;Acc:11045]

l2 [Source:HGNC Symbol;Acc:11045]

Symbol;Acc:26641]

Symbol;Acc:26641]

Symbol;Acc:26641]

ol;Acc:11377]

ol;Acc:11377]

ymbol;Acc:16836]

ymbol;Acc:16836]

ymbol;Acc:25508]

ymbol;Acc:25508]
