# Supplementary material for: Developmental plasticity of epithelial stem cells in tooth and taste bud renewal
Source: PubMed Central journal article supplement — Proc Natl Acad Sci U S A. 2019 Aug 19;116(36):17858–66. doi: 10.1073/pnas.1821202116 (PMC6731641; doi:10.1073/pnas.1821202116), 2019-08-19
Supplement: pnas.1821202116.sd04.pdf [file pnas.1821202116.sd04.pdf]

## Toal 501 Up-regulated gene in Fst-/- ; 176 down-regulated gene in Fst-/-

### Toal 501 Up-reguated gene in Fst-/- (P<=0.05 1.5 Folds change)

| Gene ID | Total counts | P-value (mut) | FDR step up | Ratio (mutant) | Fold change (LSMean(mutant)) |          |
|---------|--------------|---------------|-------------|----------------|------------------------------|----------|
| Myh7    | 4.11E+02     | 9.32E-07      | 9.07E-03    | 2.84E+01       | 2.84E+01                     | 1.32E+02 |
| Myh6    | 9.22E+01     | 1.16E-06      | 9.07E-03    | 2.23E+01       | 2.23E+01                     | 2.94E+01 |
| Myl3    | 5.56E+01     | 5.11E-06      | 1.58E-02    | 2.10E+01       | 2.10E+01                     | 1.77E+01 |
| Eya2    | 3.24E+01     | 1.40E-05      | 2.19E-02    | 6.49E+00       | 6.49E+00                     | 9.37E+00 |
| Myh7b   | 3.05E+01     | 4.14E-05      | 4.36E-02    | 6.47E+00       | 6.47E+00                     | 8.81E+00 |
| Tpsab1  | 8.84E+00     | 3.12E-04      | 1.36E-01    | 5.41E+00       | 5.41E+00                     | 2.49E+00 |
| Xist    | 2.63E+03     | 1.26E-02      | 2.91E-01    | 5.19E+00       | 5.19E+00                     | 7.35E+02 |
| Pthlh   | 1.74E+01     | 6.18E-05      | 5.37E-02    | 5.09E+00       | 5.09E+00                     | 4.84E+00 |
| Mb      | 5.51E+01     | 1.18E-04      | 7.39E-02    | 4.63E+00       | 4.63E+00                     | 1.51E+01 |
| Wfdc18  | 2.43E+01     | 1.64E-02      | 2.97E-01    | 4.06E+00       | 4.06E+00                     | 6.50E+00 |
| Tnnc1   | 1.99E+02     | 1.34E-05      | 2.19E-02    | 3.86E+00       | 3.86E+00                     | 5.27E+01 |
| Dmrta2  | 1.86E+01     | 8.78E-05      | 5.73E-02    | 3.86E+00       | 3.86E+00                     | 4.93E+00 |
| Sprr2a2 | 2.32E+01     | 4.93E-04      | 1.43E-01    | 3.73E+00       | 3.73E+00                     | 6.09E+00 |
| Pyhin1  | 1.17E+01     | 2.99E-02      | 3.10E-01    | 3.50E+00       | 3.50E+00                     | 3.04E+00 |
| Mid1    | 1.28E+02     | 3.23E-04      | 1.37E-01    | 3.45E+00       | 3.45E+00                     | 3.31E+01 |
| Gm21857 | 9.22E+00     | 6.49E-03      | 2.79E-01    | 3.35E+00       | 3.35E+00                     | 2.37E+00 |
| Myl6b   | 1.63E+02     | 8.29E-05      | 5.64E-02    | 3.32E+00       | 3.32E+00                     | 4.17E+01 |
| Ifi204  | 1.85E+01     | 1.59E-02      | 2.97E-01    | 3.25E+00       | 3.25E+00                     | 4.72E+00 |
| Ppbp    | 1.92E+01     | 3.76E-03      | 2.45E-01    | 3.18E+00       | 3.18E+00                     | 4.86E+00 |
| Ifi202b | 4.00E+01     | 5.80E-05      | 5.37E-02    | 3.17E+00       | 3.17E+00                     | 1.01E+01 |
| Cma1    | 2.57E+01     | 2.71E-05      | 3.86E-02    | 3.13E+00       | 3.13E+00                     | 6.48E+00 |
| Cyp4b1  | 1.61E+01     | 2.65E-03      | 2.33E-01    | 3.12E+00       | 3.12E+00                     | 4.06E+00 |
| Tfcp2l1 | 1.23E+02     | 6.28E-03      | 2.79E-01    | 3.09E+00       | 3.09E+00                     | 3.09E+01 |
| Gm9573  | 7.29E+01     | 1.36E-02      | 2.93E-01    | 2.99E+00       | 2.99E+00                     | 1.82E+01 |
| Mcpt4   | 1.21E+01     | 4.37E-04      | 1.40E-01    | 2.87E+00       | 2.87E+00                     | 2.98E+00 |
| Pi15    | 1.61E+01     | 5.04E-04      | 1.43E-01    | 2.84E+00       | 2.84E+00                     | 3.97E+00 |
| Tpsb2   | 3.78E+01     | 3.61E-05      | 4.36E-02    | 2.80E+00       | 2.80E+00                     | 9.29E+00 |
| Sprr2a1 | 1.96E+01     | 1.46E-02      | 2.93E-01    | 2.80E+00       | 2.80E+00                     | 4.80E+00 |
| Hmgcs2  | 7.75E+00     | 2.85E-04      | 1.35E-01    | 2.76E+00       | 2.76E+00                     | 1.90E+00 |
| Cpxm2   | 4.97E+01     | 7.67E-03      | 2.79E-01    | 2.75E+00       | 2.75E+00                     | 1.22E+01 |
| Gm21887 | 3.04E+01     | 1.90E-02      | 3.01E-01    | 2.74E+00       | 2.74E+00                     | 7.42E+00 |
| Lpar3   | 2.44E+01     | 1.15E-03      | 1.93E-01    | 2.68E+00       | 2.68E+00                     | 5.93E+00 |
| Pbp2    | 4.02E+01     | 2.66E-02      | 3.04E-01    | 2.62E+00       | 2.62E+00                     | 9.69E+00 |
| Lgr5    | 8.32E+01     | 1.45E-03      | 2.01E-01    | 2.58E+00       | 2.58E+00                     | 2.00E+01 |
| Cpa3    | 2.62E+01     | 7.75E-04      | 1.61E-01    | 2.57E+00       | 2.57E+00                     | 6.28E+00 |
| Ltf     | 9.85E+01     | 1.80E-02      | 2.99E-01    | 2.54E+00       | 2.54E+00                     | 2.35E+01 |
| Plb1    | 7.37E+01     | 8.43E-04      | 1.61E-01    | 2.53E+00       | 2.53E+00                     | 1.76E+01 |
| Aldh3a1 | 1.53E+01     | 6.18E-03      | 2.79E-01    | 2.52E+00       | 2.52E+00                     | 3.66E+00 |

|             |          |          |          |          |          |          |
|-------------|----------|----------|----------|----------|----------|----------|
| Dynap       | 2.66E+01 | 7.34E-03 | 2.79E-01 | 2.51E+00 | 2.51E+00 | 6.34E+00 |
| Krt7        | 2.35E+02 | 4.29E-03 | 2.61E-01 | 2.49E+00 | 2.49E+00 | 5.58E+01 |
| Hdc         | 3.49E+01 | 7.35E-05 | 5.41E-02 | 2.47E+00 | 2.47E+00 | 8.28E+00 |
| Cpz         | 1.42E+01 | 2.97E-04 | 1.35E-01 | 2.46E+00 | 2.46E+00 | 3.36E+00 |
| Krt8        | 5.40E+01 | 3.34E-03 | 2.35E-01 | 2.46E+00 | 2.46E+00 | 1.28E+01 |
| Fam26e      | 2.31E+01 | 4.18E-05 | 4.36E-02 | 2.45E+00 | 2.45E+00 | 5.46E+00 |
| AV026068    | 1.70E+01 | 1.53E-02 | 2.95E-01 | 2.44E+00 | 2.44E+00 | 4.02E+00 |
| Psmc3ip     | 1.62E+01 | 5.86E-04 | 1.52E-01 | 2.42E+00 | 2.42E+00 | 3.81E+00 |
| Il1rl1      | 7.58E+00 | 1.42E-03 | 2.01E-01 | 2.41E+00 | 2.41E+00 | 1.79E+00 |
| Tmprss11g   | 8.35E+01 | 1.78E-03 | 2.10E-01 | 2.41E+00 | 2.41E+00 | 1.97E+01 |
| Cldn7       | 1.35E+01 | 2.39E-03 | 2.28E-01 | 2.40E+00 | 2.40E+00 | 3.18E+00 |
| Arg1        | 4.22E+02 | 1.74E-02 | 2.99E-01 | 2.37E+00 | 2.37E+00 | 9.90E+01 |
| Ccl21a      | 2.00E+01 | 2.14E-02 | 3.01E-01 | 2.37E+00 | 2.37E+00 | 4.68E+00 |
| Hs3st1      | 2.25E+01 | 7.61E-05 | 5.41E-02 | 2.36E+00 | 2.36E+00 | 5.26E+00 |
| Col9a3      | 1.63E+01 | 5.30E-03 | 2.79E-01 | 2.34E+00 | 2.34E+00 | 3.82E+00 |
| Barx1       | 3.00E+01 | 4.27E-03 | 2.61E-01 | 2.34E+00 | 2.34E+00 | 7.00E+00 |
| RP23-396C19 | 8.12E+00 | 9.96E-03 | 2.86E-01 | 2.34E+00 | 2.34E+00 | 1.89E+00 |
| Phex        | 1.10E+01 | 1.12E-02 | 2.90E-01 | 2.31E+00 | 2.31E+00 | 2.55E+00 |
| Shh         | 1.76E+01 | 1.83E-03 | 2.10E-01 | 2.31E+00 | 2.31E+00 | 4.09E+00 |
| Anxa1       | 5.41E+02 | 4.54E-03 | 2.70E-01 | 2.29E+00 | 2.29E+00 | 1.25E+02 |
| Crabp2      | 1.25E+02 | 1.11E-02 | 2.90E-01 | 2.28E+00 | 2.28E+00 | 2.90E+01 |
| Gdf6        | 1.67E+01 | 1.50E-02 | 2.95E-01 | 2.27E+00 | 2.27E+00 | 3.87E+00 |
| Shox2       | 9.53E+00 | 4.68E-03 | 2.74E-01 | 2.27E+00 | 2.27E+00 | 2.20E+00 |
| Pirt        | 1.30E+01 | 1.78E-03 | 2.10E-01 | 2.27E+00 | 2.27E+00 | 3.00E+00 |
| Il1a        | 9.07E+00 | 1.29E-02 | 2.93E-01 | 2.26E+00 | 2.26E+00 | 2.10E+00 |
| Cd74        | 1.41E+01 | 1.57E-03 | 2.02E-01 | 2.26E+00 | 2.26E+00 | 3.27E+00 |
| Erdr1       | 8.35E+01 | 1.91E-02 | 3.01E-01 | 2.25E+00 | 2.25E+00 | 1.93E+01 |
| Stac        | 1.94E+01 | 8.12E-04 | 1.61E-01 | 2.24E+00 | 2.24E+00 | 4.48E+00 |
| Smt3h1-ps   | 1.76E+01 | 4.84E-02 | 3.19E-01 | 2.23E+00 | 2.23E+00 | 4.05E+00 |
| Mndal       | 1.25E+01 | 8.55E-03 | 2.79E-01 | 2.23E+00 | 2.23E+00 | 2.87E+00 |
| Cwh43       | 1.98E+01 | 3.19E-02 | 3.11E-01 | 2.23E+00 | 2.23E+00 | 4.55E+00 |
| Syndig1     | 2.30E+01 | 1.04E-03 | 1.87E-01 | 2.22E+00 | 2.22E+00 | 5.28E+00 |
| Illdr1      | 3.73E+01 | 4.52E-03 | 2.70E-01 | 2.21E+00 | 2.21E+00 | 8.57E+00 |
| Nefm        | 9.36E+00 | 2.78E-02 | 3.05E-01 | 2.21E+00 | 2.21E+00 | 2.15E+00 |
| Krt18       | 5.88E+01 | 3.28E-03 | 2.35E-01 | 2.20E+00 | 2.20E+00 | 1.35E+01 |
| Apol7a      | 1.72E+01 | 1.92E-02 | 3.01E-01 | 2.19E+00 | 2.19E+00 | 3.93E+00 |
| St6galnac2  | 4.78E+01 | 4.49E-04 | 1.41E-01 | 2.19E+00 | 2.19E+00 | 1.09E+01 |
| Pisd-ps2    | 1.07E+01 | 2.92E-02 | 3.10E-01 | 2.19E+00 | 2.19E+00 | 2.44E+00 |
| Tmem8       | 1.95E+01 | 2.29E-02 | 3.01E-01 | 2.17E+00 | 2.17E+00 | 4.44E+00 |
| Gm8797      | 3.05E+02 | 3.76E-02 | 3.16E-01 | 2.16E+00 | 2.16E+00 | 6.95E+01 |
| Adamts19    | 9.77E+00 | 2.60E-03 | 2.33E-01 | 2.16E+00 | 2.16E+00 | 2.23E+00 |
| Rbp1        | 5.50E+01 | 2.45E-04 | 1.24E-01 | 2.15E+00 | 2.15E+00 | 1.25E+01 |
| Cfap45      | 8.29E+00 | 2.43E-02 | 3.02E-01 | 2.15E+00 | 2.15E+00 | 1.89E+00 |

|             |          |          |          |          |          |          |
|-------------|----------|----------|----------|----------|----------|----------|
| Krt19       | 1.52E+02 | 2.01E-02 | 3.01E-01 | 2.15E+00 | 2.15E+00 | 3.46E+01 |
| Ccdc68      | 1.68E+01 | 2.70E-02 | 3.04E-01 | 2.14E+00 | 2.14E+00 | 3.81E+00 |
| Slc5a7      | 7.18E+00 | 1.01E-03 | 1.87E-01 | 2.14E+00 | 2.14E+00 | 1.63E+00 |
| Crabp1      | 3.57E+01 | 6.12E-03 | 2.79E-01 | 2.14E+00 | 2.14E+00 | 8.10E+00 |
| H2-Aa       | 6.96E+00 | 8.67E-03 | 2.79E-01 | 2.14E+00 | 2.14E+00 | 1.58E+00 |
| Fanca       | 1.03E+01 | 5.50E-03 | 2.79E-01 | 2.13E+00 | 2.13E+00 | 2.34E+00 |
| Hbb-bt      | 3.95E+02 | 4.65E-02 | 3.17E-01 | 2.12E+00 | 2.12E+00 | 8.96E+01 |
| Prkcb       | 6.57E+00 | 1.73E-03 | 2.10E-01 | 2.12E+00 | 2.12E+00 | 1.49E+00 |
| Adamts16    | 6.86E+00 | 1.19E-02 | 2.91E-01 | 2.12E+00 | 2.12E+00 | 1.55E+00 |
| Gm17167     | 7.50E+00 | 3.53E-02 | 3.11E-01 | 2.11E+00 | 2.11E+00 | 1.70E+00 |
| Plac8       | 2.60E+01 | 2.48E-02 | 3.02E-01 | 2.11E+00 | 2.11E+00 | 5.89E+00 |
| Mapk15      | 1.30E+01 | 8.25E-03 | 2.79E-01 | 2.10E+00 | 2.10E+00 | 2.94E+00 |
| Brinp1      | 2.21E+01 | 7.11E-04 | 1.60E-01 | 2.10E+00 | 2.10E+00 | 4.99E+00 |
| Fst         | 3.09E+02 | 4.31E-06 | 1.58E-02 | 2.10E+00 | 2.10E+00 | 6.97E+01 |
| Icosl       | 2.34E+01 | 6.89E-04 | 1.60E-01 | 2.10E+00 | 2.10E+00 | 5.28E+00 |
| Medag       | 5.33E+01 | 6.05E-05 | 5.37E-02 | 2.09E+00 | 2.09E+00 | 1.20E+01 |
| Clec11a     | 1.51E+01 | 7.52E-03 | 2.79E-01 | 2.08E+00 | 2.08E+00 | 3.40E+00 |
| Rnf182      | 1.02E+01 | 1.39E-03 | 2.01E-01 | 2.07E+00 | 2.07E+00 | 2.30E+00 |
| Qpct        | 3.12E+01 | 2.61E-03 | 2.33E-01 | 2.07E+00 | 2.07E+00 | 7.00E+00 |
| A730017C20f | 7.51E+00 | 1.28E-02 | 2.92E-01 | 2.06E+00 | 2.06E+00 | 1.69E+00 |
| Sbspon      | 1.60E+01 | 1.29E-03 | 2.01E-01 | 2.05E+00 | 2.05E+00 | 3.60E+00 |
| Atrip       | 1.03E+01 | 8.33E-03 | 2.79E-01 | 2.03E+00 | 2.03E+00 | 2.30E+00 |
| Tnnt1       | 3.14E+02 | 1.56E-03 | 2.02E-01 | 2.03E+00 | 2.03E+00 | 7.02E+01 |
| Dlx1        | 2.50E+01 | 2.83E-03 | 2.33E-01 | 2.02E+00 | 2.02E+00 | 5.58E+00 |
| Epcam       | 1.93E+02 | 2.48E-03 | 2.29E-01 | 2.02E+00 | 2.02E+00 | 4.31E+01 |
| Mss51       | 1.52E+01 | 6.46E-03 | 2.79E-01 | 2.02E+00 | 2.02E+00 | 3.39E+00 |
| Osr2        | 7.30E+01 | 1.98E-03 | 2.10E-01 | 2.01E+00 | 2.01E+00 | 1.63E+01 |
| Adgrg2      | 3.03E+01 | 1.84E-03 | 2.10E-01 | 2.00E+00 | 2.00E+00 | 6.72E+00 |
| Fosb        | 6.67E+02 | 4.92E-02 | 3.20E-01 | 2.00E+00 | 2.00E+00 | 1.48E+02 |
| Ikzf1       | 9.91E+00 | 1.10E-03 | 1.90E-01 | 1.99E+00 | 1.99E+00 | 2.20E+00 |
| Dact2       | 7.82E+01 | 4.89E-04 | 1.43E-01 | 1.99E+00 | 1.99E+00 | 1.74E+01 |
| Spock3      | 6.19E+01 | 1.40E-03 | 2.01E-01 | 1.99E+00 | 1.99E+00 | 1.37E+01 |
| Mapt        | 3.82E+01 | 2.11E-04 | 1.14E-01 | 1.99E+00 | 1.99E+00 | 8.47E+00 |
| Fabp7       | 7.42E+00 | 1.09E-02 | 2.90E-01 | 1.98E+00 | 1.98E+00 | 1.64E+00 |
| Cdhr1       | 4.03E+01 | 4.32E-04 | 1.40E-01 | 1.98E+00 | 1.98E+00 | 8.93E+00 |
| Fcgr2b      | 7.75E+00 | 3.59E-03 | 2.44E-01 | 1.98E+00 | 1.98E+00 | 1.72E+00 |
| Lhx8        | 3.07E+01 | 1.56E-03 | 2.02E-01 | 1.98E+00 | 1.98E+00 | 6.79E+00 |
| Gm34379     | 1.21E+01 | 3.48E-02 | 3.11E-01 | 1.98E+00 | 1.98E+00 | 2.68E+00 |
| Duox2       | 7.67E+00 | 2.74E-03 | 2.33E-01 | 1.96E+00 | 1.96E+00 | 1.69E+00 |
| Ephb1       | 1.68E+01 | 1.24E-03 | 2.01E-01 | 1.95E+00 | 1.95E+00 | 3.69E+00 |
| Prr18       | 6.57E+00 | 6.80E-03 | 2.79E-01 | 1.95E+00 | 1.95E+00 | 1.45E+00 |
| Cacna1e     | 4.85E+01 | 7.11E-04 | 1.60E-01 | 1.95E+00 | 1.95E+00 | 1.07E+01 |
| Ifi44       | 7.32E+00 | 3.81E-02 | 3.17E-01 | 1.95E+00 | 1.95E+00 | 1.61E+00 |

|          |          |          |          |          |          |          |
|----------|----------|----------|----------|----------|----------|----------|
| Slc7a11  | 2.41E+01 | 2.17E-02 | 3.01E-01 | 1.95E+00 | 1.95E+00 | 5.30E+00 |
| Casp12   | 1.23E+01 | 6.97E-03 | 2.79E-01 | 1.94E+00 | 1.94E+00 | 2.71E+00 |
| Nat8l    | 4.74E+01 | 1.30E-03 | 2.01E-01 | 1.94E+00 | 1.94E+00 | 1.04E+01 |
| Gfra3    | 1.15E+01 | 2.36E-03 | 2.28E-01 | 1.93E+00 | 1.93E+00 | 2.53E+00 |
| Gpm6b    | 2.18E+02 | 1.17E-05 | 2.19E-02 | 1.93E+00 | 1.93E+00 | 4.79E+01 |
| Epha3    | 2.20E+02 | 4.36E-04 | 1.40E-01 | 1.93E+00 | 1.93E+00 | 4.82E+01 |
| Pla2g7   | 1.31E+01 | 3.98E-02 | 3.17E-01 | 1.93E+00 | 1.93E+00 | 2.88E+00 |
| Vit      | 1.34E+01 | 8.50E-03 | 2.79E-01 | 1.91E+00 | 1.91E+00 | 2.93E+00 |
| Gm13232  | 2.60E+01 | 4.31E-02 | 3.17E-01 | 1.91E+00 | 1.91E+00 | 5.68E+00 |
| Anxa3    | 4.34E+01 | 7.79E-03 | 2.79E-01 | 1.91E+00 | 1.91E+00 | 9.50E+00 |
| Nell1    | 4.65E+01 | 1.26E-02 | 2.91E-01 | 1.91E+00 | 1.91E+00 | 1.02E+01 |
| Coch     | 1.08E+01 | 2.79E-02 | 3.05E-01 | 1.90E+00 | 1.90E+00 | 2.35E+00 |
| Gm12004  | 8.96E+00 | 4.32E-02 | 3.17E-01 | 1.90E+00 | 1.90E+00 | 1.96E+00 |
| Avpr1a   | 1.74E+01 | 6.47E-03 | 2.79E-01 | 1.89E+00 | 1.89E+00 | 3.79E+00 |
| Gm12940  | 5.77E+01 | 3.26E-02 | 3.11E-01 | 1.88E+00 | 1.88E+00 | 1.26E+01 |
| Ankrd6   | 4.32E+01 | 2.13E-03 | 2.15E-01 | 1.88E+00 | 1.88E+00 | 9.40E+00 |
| Bnc1     | 4.39E+01 | 7.49E-03 | 2.79E-01 | 1.88E+00 | 1.88E+00 | 9.56E+00 |
| Lrmp     | 2.09E+01 | 3.29E-02 | 3.11E-01 | 1.87E+00 | 1.87E+00 | 4.55E+00 |
| Hba-a1   | 9.79E+02 | 1.13E-02 | 2.90E-01 | 1.87E+00 | 1.87E+00 | 2.13E+02 |
| Slc22a4  | 8.24E+00 | 2.66E-02 | 3.04E-01 | 1.87E+00 | 1.87E+00 | 1.79E+00 |
| Upk3bl   | 7.59E+01 | 3.24E-03 | 2.35E-01 | 1.86E+00 | 1.86E+00 | 1.64E+01 |
| Stmnd1   | 9.25E+00 | 3.21E-03 | 2.35E-01 | 1.86E+00 | 1.86E+00 | 2.00E+00 |
| Crispld2 | 6.43E+01 | 4.09E-04 | 1.40E-01 | 1.85E+00 | 1.85E+00 | 1.39E+01 |
| Pisd-ps1 | 5.39E+01 | 3.55E-02 | 3.11E-01 | 1.85E+00 | 1.85E+00 | 1.17E+01 |
| Acd      | 3.69E+01 | 7.28E-03 | 2.79E-01 | 1.85E+00 | 1.85E+00 | 8.00E+00 |
| Gal3st3  | 1.20E+01 | 4.79E-03 | 2.75E-01 | 1.85E+00 | 1.85E+00 | 2.60E+00 |
| Islr2    | 3.32E+01 | 5.45E-04 | 1.52E-01 | 1.85E+00 | 1.85E+00 | 7.19E+00 |
| Prrt2    | 1.89E+01 | 3.92E-02 | 3.17E-01 | 1.85E+00 | 1.85E+00 | 4.08E+00 |
| Smpdl3b  | 6.97E+00 | 5.75E-03 | 2.79E-01 | 1.84E+00 | 1.84E+00 | 1.51E+00 |
| Nuak2    | 6.63E+01 | 4.18E-03 | 2.58E-01 | 1.84E+00 | 1.84E+00 | 1.43E+01 |
| Gm16897  | 1.27E+01 | 2.05E-02 | 3.01E-01 | 1.84E+00 | 1.84E+00 | 2.74E+00 |
| Itgb8    | 7.69E+01 | 1.10E-03 | 1.90E-01 | 1.84E+00 | 1.84E+00 | 1.66E+01 |
| Gli1     | 1.44E+02 | 4.00E-04 | 1.40E-01 | 1.84E+00 | 1.84E+00 | 3.12E+01 |
| Sox2     | 2.74E+02 | 2.84E-03 | 2.33E-01 | 1.83E+00 | 1.83E+00 | 5.92E+01 |
| Plscr1   | 6.87E+00 | 2.42E-02 | 3.02E-01 | 1.83E+00 | 1.83E+00 | 1.48E+00 |
| Fbln1    | 2.60E+02 | 1.10E-03 | 1.90E-01 | 1.83E+00 | 1.83E+00 | 5.60E+01 |
| Hapln1   | 8.38E+00 | 9.98E-03 | 2.86E-01 | 1.82E+00 | 1.82E+00 | 1.80E+00 |
| Al606473 | 1.47E+01 | 6.95E-03 | 2.79E-01 | 1.82E+00 | 1.82E+00 | 3.17E+00 |
| Sfrp4    | 1.52E+01 | 2.30E-02 | 3.01E-01 | 1.82E+00 | 1.82E+00 | 3.26E+00 |
| Cyp3a13  | 1.58E+01 | 4.86E-02 | 3.19E-01 | 1.82E+00 | 1.82E+00 | 3.39E+00 |
| Emb      | 7.26E+01 | 5.77E-03 | 2.79E-01 | 1.82E+00 | 1.82E+00 | 1.56E+01 |
| Gm10182  | 2.02E+02 | 1.35E-04 | 7.81E-02 | 1.81E+00 | 1.81E+00 | 4.34E+01 |
| Prss22   | 2.11E+01 | 2.63E-02 | 3.03E-01 | 1.81E+00 | 1.81E+00 | 4.52E+00 |

|           |          |          |          |          |          |          |
|-----------|----------|----------|----------|----------|----------|----------|
| Naaa      | 2.46E+01 | 3.06E-03 | 2.35E-01 | 1.81E+00 | 1.81E+00 | 5.28E+00 |
| Dscc1     | 9.47E+00 | 2.06E-02 | 3.01E-01 | 1.81E+00 | 1.81E+00 | 2.03E+00 |
| Xlr3a     | 1.29E+01 | 4.63E-02 | 3.17E-01 | 1.81E+00 | 1.81E+00 | 2.77E+00 |
| Kcnt2     | 2.19E+01 | 3.81E-03 | 2.45E-01 | 1.81E+00 | 1.81E+00 | 4.69E+00 |
| Tmprss11b | 1.96E+02 | 2.59E-02 | 3.02E-01 | 1.81E+00 | 1.81E+00 | 4.19E+01 |
| Gria2     | 7.22E+00 | 2.61E-02 | 3.03E-01 | 1.80E+00 | 1.80E+00 | 1.55E+00 |
| Rac2      | 9.96E+00 | 1.42E-02 | 2.93E-01 | 1.80E+00 | 1.80E+00 | 2.13E+00 |
| Grem1     | 8.03E+01 | 7.12E-03 | 2.79E-01 | 1.80E+00 | 1.80E+00 | 1.72E+01 |
| Clca3a1   | 6.62E+00 | 2.81E-02 | 3.05E-01 | 1.80E+00 | 1.80E+00 | 1.42E+00 |
| Rasa4     | 2.13E+01 | 2.83E-03 | 2.33E-01 | 1.80E+00 | 1.80E+00 | 4.57E+00 |
| Slc35d3   | 7.97E+00 | 3.89E-02 | 3.17E-01 | 1.80E+00 | 1.80E+00 | 1.71E+00 |
| Cdc45     | 1.50E+01 | 3.88E-02 | 3.17E-01 | 1.79E+00 | 1.79E+00 | 3.20E+00 |
| Mpped2    | 2.07E+01 | 1.79E-03 | 2.10E-01 | 1.79E+00 | 1.79E+00 | 4.43E+00 |
| Tac1      | 7.60E+00 | 4.21E-02 | 3.17E-01 | 1.79E+00 | 1.79E+00 | 1.63E+00 |
| Tfap2b    | 9.76E+01 | 4.31E-03 | 2.61E-01 | 1.79E+00 | 1.79E+00 | 2.09E+01 |
| Ctxn3     | 1.47E+01 | 7.37E-03 | 2.79E-01 | 1.79E+00 | 1.79E+00 | 3.15E+00 |
| Pzca      | 3.44E+02 | 4.92E-02 | 3.20E-01 | 1.79E+00 | 1.79E+00 | 7.36E+01 |
| Adam8     | 1.31E+01 | 6.77E-03 | 2.79E-01 | 1.78E+00 | 1.78E+00 | 2.81E+00 |
| Lyz2      | 5.50E+01 | 3.82E-02 | 3.17E-01 | 1.78E+00 | 1.78E+00 | 1.17E+01 |
| Rgs14     | 9.12E+00 | 2.38E-02 | 3.02E-01 | 1.78E+00 | 1.78E+00 | 1.95E+00 |
| Ccr2      | 1.33E+01 | 2.94E-02 | 3.10E-01 | 1.78E+00 | 1.78E+00 | 2.84E+00 |
| Timp1     | 9.49E+00 | 8.34E-03 | 2.79E-01 | 1.78E+00 | 1.78E+00 | 2.03E+00 |
| Ctss      | 1.61E+01 | 3.42E-02 | 3.11E-01 | 1.78E+00 | 1.78E+00 | 3.43E+00 |
| Col9a1    | 6.99E+00 | 1.37E-02 | 2.93E-01 | 1.78E+00 | 1.78E+00 | 1.49E+00 |
| Gm12473   | 9.14E+00 | 2.12E-02 | 3.01E-01 | 1.77E+00 | 1.77E+00 | 1.95E+00 |
| Mettl21c  | 1.30E+01 | 1.76E-02 | 2.99E-01 | 1.77E+00 | 1.77E+00 | 2.76E+00 |
| Crip1     | 9.64E+01 | 1.74E-02 | 2.99E-01 | 1.77E+00 | 1.77E+00 | 2.05E+01 |
| Olfm12a   | 1.54E+02 | 4.19E-04 | 1.40E-01 | 1.76E+00 | 1.76E+00 | 3.28E+01 |
| Kcnk1     | 5.04E+01 | 3.81E-03 | 2.45E-01 | 1.76E+00 | 1.76E+00 | 1.07E+01 |
| Tmem132e  | 8.29E+00 | 2.10E-02 | 3.01E-01 | 1.76E+00 | 1.76E+00 | 1.76E+00 |
| Luzp2     | 2.07E+01 | 2.69E-03 | 2.33E-01 | 1.76E+00 | 1.76E+00 | 4.40E+00 |
| Prss12    | 3.71E+01 | 1.70E-02 | 2.98E-01 | 1.75E+00 | 1.75E+00 | 7.87E+00 |
| Dkk2      | 1.63E+02 | 7.01E-03 | 2.79E-01 | 1.75E+00 | 1.75E+00 | 3.45E+01 |
| BC055324  | 1.44E+01 | 1.79E-02 | 2.99E-01 | 1.75E+00 | 1.75E+00 | 3.06E+00 |
| Lppr4     | 2.05E+01 | 4.39E-03 | 2.64E-01 | 1.75E+00 | 1.75E+00 | 4.35E+00 |
| Gm38317   | 4.32E+01 | 1.09E-02 | 2.90E-01 | 1.75E+00 | 1.75E+00 | 9.17E+00 |
| Txn1      | 1.67E+02 | 3.33E-02 | 3.11E-01 | 1.75E+00 | 1.75E+00 | 3.54E+01 |
| Kcnv1     | 1.94E+01 | 3.45E-02 | 3.11E-01 | 1.75E+00 | 1.75E+00 | 4.11E+00 |
| Plxdc1    | 2.25E+01 | 9.34E-03 | 2.82E-01 | 1.75E+00 | 1.75E+00 | 4.77E+00 |
| Kera      | 1.16E+02 | 5.05E-03 | 2.79E-01 | 1.74E+00 | 1.74E+00 | 2.47E+01 |
| Asb5      | 3.85E+01 | 2.67E-02 | 3.04E-01 | 1.74E+00 | 1.74E+00 | 8.16E+00 |
| Ppp4r4    | 7.85E+00 | 3.50E-02 | 3.11E-01 | 1.74E+00 | 1.74E+00 | 1.66E+00 |
| Tmem100   | 6.40E+01 | 3.01E-04 | 1.35E-01 | 1.74E+00 | 1.74E+00 | 1.36E+01 |

|         |          |          |          |          |          |          |
|---------|----------|----------|----------|----------|----------|----------|
| Gm12854 | 3.06E+02 | 1.66E-02 | 2.97E-01 | 1.74E+00 | 1.74E+00 | 6.47E+01 |
| Hpn     | 1.05E+01 | 1.11E-02 | 2.90E-01 | 1.74E+00 | 1.74E+00 | 2.21E+00 |
| Insl6   | 1.15E+01 | 8.93E-03 | 2.79E-01 | 1.74E+00 | 1.74E+00 | 2.43E+00 |
| Adprhl1 | 7.20E+01 | 7.29E-03 | 2.79E-01 | 1.73E+00 | 1.73E+00 | 1.52E+01 |
| Lmo1    | 1.39E+01 | 3.25E-02 | 3.11E-01 | 1.73E+00 | 1.73E+00 | 2.94E+00 |
| Car5b   | 1.05E+01 | 6.35E-03 | 2.79E-01 | 1.73E+00 | 1.73E+00 | 2.23E+00 |
| Aff3    | 1.29E+02 | 4.22E-04 | 1.40E-01 | 1.73E+00 | 1.73E+00 | 2.73E+01 |
| Pglyrp4 | 7.72E+00 | 3.32E-02 | 3.11E-01 | 1.73E+00 | 1.73E+00 | 1.63E+00 |
| Recql4  | 1.87E+01 | 5.25E-03 | 2.79E-01 | 1.73E+00 | 1.73E+00 | 3.94E+00 |
| Hbb-bs  | 1.03E+03 | 2.44E-02 | 3.02E-01 | 1.73E+00 | 1.73E+00 | 2.17E+02 |
| Ppp2r2b | 1.59E+01 | 1.40E-02 | 2.93E-01 | 1.72E+00 | 1.72E+00 | 3.35E+00 |
| Cthrc1  | 8.41E+01 | 2.07E-03 | 2.14E-01 | 1.72E+00 | 1.72E+00 | 1.77E+01 |
| Camk4   | 2.54E+01 | 1.52E-02 | 2.95E-01 | 1.72E+00 | 1.72E+00 | 5.36E+00 |
| Csf2rb  | 2.26E+01 | 2.02E-03 | 2.10E-01 | 1.72E+00 | 1.72E+00 | 4.77E+00 |
| H2-Q4   | 2.40E+01 | 2.16E-02 | 3.01E-01 | 1.72E+00 | 1.72E+00 | 5.06E+00 |
| Ifi30   | 4.53E+01 | 2.94E-02 | 3.10E-01 | 1.71E+00 | 1.71E+00 | 9.54E+00 |
| Hoxa2   | 8.42E+00 | 3.49E-02 | 3.11E-01 | 1.71E+00 | 1.71E+00 | 1.77E+00 |
| Arg2    | 1.02E+01 | 4.32E-02 | 3.17E-01 | 1.71E+00 | 1.71E+00 | 2.14E+00 |
| Sfrp1   | 4.35E+02 | 9.27E-04 | 1.75E-01 | 1.71E+00 | 1.71E+00 | 9.15E+01 |
| Car13   | 1.80E+02 | 1.59E-02 | 2.97E-01 | 1.71E+00 | 1.71E+00 | 3.78E+01 |
| Adgrb2  | 5.72E+01 | 2.45E-03 | 2.29E-01 | 1.71E+00 | 1.71E+00 | 1.20E+01 |
| Cyp1b1  | 2.12E+01 | 1.68E-02 | 2.98E-01 | 1.71E+00 | 1.71E+00 | 4.46E+00 |
| Zcchc18 | 1.22E+01 | 6.58E-03 | 2.79E-01 | 1.71E+00 | 1.71E+00 | 2.56E+00 |
| Slitrk4 | 4.34E+01 | 1.06E-02 | 2.90E-01 | 1.71E+00 | 1.71E+00 | 9.11E+00 |
| Ms4a6d  | 7.27E+00 | 3.04E-02 | 3.11E-01 | 1.71E+00 | 1.71E+00 | 1.53E+00 |
| Eya1    | 2.35E+01 | 1.12E-02 | 2.90E-01 | 1.71E+00 | 1.71E+00 | 4.93E+00 |
| Sv2c    | 1.28E+01 | 1.54E-02 | 2.95E-01 | 1.70E+00 | 1.70E+00 | 2.68E+00 |
| Thoc5   | 3.69E+01 | 3.92E-02 | 3.17E-01 | 1.70E+00 | 1.70E+00 | 7.74E+00 |
| Nsmce1  | 2.70E+01 | 3.88E-02 | 3.17E-01 | 1.70E+00 | 1.70E+00 | 5.66E+00 |
| Hsd17b2 | 4.64E+01 | 3.04E-02 | 3.11E-01 | 1.70E+00 | 1.70E+00 | 9.74E+00 |
| Plcg2   | 9.54E+00 | 4.16E-02 | 3.17E-01 | 1.70E+00 | 1.70E+00 | 2.00E+00 |
| Acap1   | 6.48E+00 | 4.33E-02 | 3.17E-01 | 1.70E+00 | 1.70E+00 | 1.36E+00 |
| Akr1b8  | 1.03E+01 | 1.83E-02 | 3.01E-01 | 1.70E+00 | 1.70E+00 | 2.16E+00 |
| Slc6a4  | 1.63E+01 | 6.19E-03 | 2.79E-01 | 1.70E+00 | 1.70E+00 | 3.42E+00 |
| Gins1   | 1.54E+01 | 1.40E-02 | 2.93E-01 | 1.69E+00 | 1.69E+00 | 3.22E+00 |
| Ass1    | 7.58E+00 | 2.45E-02 | 3.02E-01 | 1.69E+00 | 1.69E+00 | 1.59E+00 |
| Spon2   | 8.19E+01 | 3.55E-03 | 2.43E-01 | 1.69E+00 | 1.69E+00 | 1.71E+01 |
| Gm43031 | 1.20E+01 | 2.94E-02 | 3.10E-01 | 1.69E+00 | 1.69E+00 | 2.51E+00 |
| Chrm2   | 8.53E+00 | 3.35E-02 | 3.11E-01 | 1.69E+00 | 1.69E+00 | 1.79E+00 |
| Pld4    | 1.16E+01 | 3.52E-02 | 3.11E-01 | 1.69E+00 | 1.69E+00 | 2.42E+00 |
| Parp8   | 3.50E+01 | 6.64E-03 | 2.79E-01 | 1.69E+00 | 1.69E+00 | 7.31E+00 |
| SrpX    | 6.30E+01 | 2.90E-03 | 2.34E-01 | 1.69E+00 | 1.69E+00 | 1.32E+01 |
| Gm5424  | 2.44E+02 | 1.35E-03 | 2.01E-01 | 1.68E+00 | 1.68E+00 | 5.10E+01 |

|             |          |          |          |          |          |          |
|-------------|----------|----------|----------|----------|----------|----------|
| Gm3851      | 8.73E+00 | 2.87E-02 | 3.08E-01 | 1.68E+00 | 1.68E+00 | 1.82E+00 |
| Slitrk5     | 7.91E+00 | 1.55E-02 | 2.95E-01 | 1.68E+00 | 1.68E+00 | 1.65E+00 |
| Npl         | 7.50E+00 | 1.39E-02 | 2.93E-01 | 1.68E+00 | 1.68E+00 | 1.57E+00 |
| Hand2       | 1.07E+02 | 1.96E-03 | 2.10E-01 | 1.68E+00 | 1.68E+00 | 2.23E+01 |
| Fgf10       | 5.13E+01 | 2.77E-03 | 2.33E-01 | 1.68E+00 | 1.68E+00 | 1.07E+01 |
| Fbxl8       | 8.13E+00 | 2.32E-02 | 3.01E-01 | 1.67E+00 | 1.67E+00 | 1.70E+00 |
| Alx4        | 3.02E+01 | 3.48E-03 | 2.42E-01 | 1.67E+00 | 1.67E+00 | 6.29E+00 |
| Echdc2      | 4.18E+01 | 1.50E-02 | 2.95E-01 | 1.67E+00 | 1.67E+00 | 8.71E+00 |
| Duox1       | 1.70E+02 | 9.51E-03 | 2.83E-01 | 1.67E+00 | 1.67E+00 | 3.55E+01 |
| Dnajc6      | 1.76E+01 | 1.24E-02 | 2.91E-01 | 1.67E+00 | 1.67E+00 | 3.66E+00 |
| Hmha1       | 1.14E+01 | 2.56E-02 | 3.02E-01 | 1.67E+00 | 1.67E+00 | 2.37E+00 |
| Pmaip1      | 4.10E+01 | 4.69E-03 | 2.74E-01 | 1.67E+00 | 1.67E+00 | 8.55E+00 |
| Sox9        | 1.25E+02 | 1.67E-04 | 9.36E-02 | 1.67E+00 | 1.67E+00 | 2.60E+01 |
| Cd53        | 1.04E+01 | 2.28E-02 | 3.01E-01 | 1.66E+00 | 1.66E+00 | 2.17E+00 |
| Epha7       | 1.50E+02 | 2.20E-04 | 1.15E-01 | 1.66E+00 | 1.66E+00 | 3.12E+01 |
| Itgbl1      | 1.16E+01 | 3.70E-02 | 3.15E-01 | 1.66E+00 | 1.66E+00 | 2.42E+00 |
| AI504432    | 1.05E+01 | 7.47E-03 | 2.79E-01 | 1.66E+00 | 1.66E+00 | 2.18E+00 |
| Cdk18       | 3.06E+01 | 3.33E-03 | 2.35E-01 | 1.66E+00 | 1.66E+00 | 6.37E+00 |
| Gm15428     | 2.41E+01 | 2.04E-02 | 3.01E-01 | 1.66E+00 | 1.66E+00 | 5.01E+00 |
| Phlda1      | 7.66E+01 | 1.44E-03 | 2.01E-01 | 1.66E+00 | 1.66E+00 | 1.59E+01 |
| Gxylt2      | 2.56E+02 | 3.64E-05 | 4.36E-02 | 1.66E+00 | 1.66E+00 | 5.31E+01 |
| Rrp9        | 2.77E+01 | 1.44E-02 | 2.93E-01 | 1.66E+00 | 1.66E+00 | 5.76E+00 |
| Bdnf        | 4.72E+01 | 8.01E-03 | 2.79E-01 | 1.66E+00 | 1.66E+00 | 9.81E+00 |
| Mir99ahg    | 1.71E+01 | 2.66E-02 | 3.04E-01 | 1.66E+00 | 1.66E+00 | 3.55E+00 |
| Ptk2b       | 4.31E+01 | 3.42E-02 | 3.11E-01 | 1.65E+00 | 1.65E+00 | 8.95E+00 |
| Tlx1        | 2.68E+01 | 2.82E-03 | 2.33E-01 | 1.65E+00 | 1.65E+00 | 5.56E+00 |
| Dync1i1     | 1.11E+01 | 1.70E-02 | 2.98E-01 | 1.65E+00 | 1.65E+00 | 2.31E+00 |
| Npr3        | 1.84E+02 | 6.34E-04 | 1.53E-01 | 1.65E+00 | 1.65E+00 | 3.82E+01 |
| Gm7665      | 5.21E+01 | 1.03E-02 | 2.89E-01 | 1.65E+00 | 1.65E+00 | 1.08E+01 |
| Wnt10b      | 1.17E+01 | 2.20E-02 | 3.01E-01 | 1.65E+00 | 1.65E+00 | 2.42E+00 |
| Tmprss4     | 6.86E+01 | 2.64E-02 | 3.04E-01 | 1.65E+00 | 1.65E+00 | 1.42E+01 |
| Chaf1b      | 4.34E+01 | 1.00E-02 | 2.87E-01 | 1.64E+00 | 1.64E+00 | 8.99E+00 |
| Ptpru       | 1.67E+02 | 2.43E-03 | 2.29E-01 | 1.64E+00 | 1.64E+00 | 3.45E+01 |
| Scn7a       | 9.20E+00 | 3.85E-02 | 3.17E-01 | 1.64E+00 | 1.64E+00 | 1.91E+00 |
| Ptgfr       | 2.51E+02 | 4.40E-04 | 1.40E-01 | 1.64E+00 | 1.64E+00 | 5.20E+01 |
| Cd9         | 3.40E+02 | 3.05E-02 | 3.11E-01 | 1.64E+00 | 1.64E+00 | 7.04E+01 |
| Gm26527     | 3.26E+01 | 3.69E-02 | 3.14E-01 | 1.64E+00 | 1.64E+00 | 6.74E+00 |
| Ldhb        | 9.46E+01 | 3.28E-02 | 3.11E-01 | 1.63E+00 | 1.63E+00 | 1.96E+01 |
| 2700099C18F | 9.75E+00 | 1.97E-02 | 3.01E-01 | 1.63E+00 | 1.63E+00 | 2.02E+00 |
| Cenpk       | 9.08E+00 | 3.70E-02 | 3.15E-01 | 1.63E+00 | 1.63E+00 | 1.88E+00 |
| Gm37509     | 1.02E+01 | 1.44E-02 | 2.93E-01 | 1.63E+00 | 1.63E+00 | 2.11E+00 |
| Dab1        | 8.69E+00 | 8.28E-03 | 2.79E-01 | 1.63E+00 | 1.63E+00 | 1.80E+00 |
| Dapk2       | 1.94E+01 | 5.79E-03 | 2.79E-01 | 1.63E+00 | 1.63E+00 | 4.00E+00 |

|            |          |          |          |          |          |          |
|------------|----------|----------|----------|----------|----------|----------|
| Me2        | 3.53E+01 | 4.66E-02 | 3.17E-01 | 1.63E+00 | 1.63E+00 | 7.29E+00 |
| Nmi        | 7.91E+00 | 3.16E-02 | 3.11E-01 | 1.63E+00 | 1.63E+00 | 1.63E+00 |
| Cbs        | 1.51E+01 | 1.00E-02 | 2.87E-01 | 1.62E+00 | 1.62E+00 | 3.12E+00 |
| Lig1       | 6.67E+01 | 2.53E-02 | 3.02E-01 | 1.62E+00 | 1.62E+00 | 1.38E+01 |
| Sema3d     | 3.71E+02 | 2.29E-03 | 2.27E-01 | 1.62E+00 | 1.62E+00 | 7.64E+01 |
| Arntl2     | 4.29E+01 | 8.67E-03 | 2.79E-01 | 1.62E+00 | 1.62E+00 | 8.85E+00 |
| Prokr1     | 4.06E+01 | 7.10E-03 | 2.79E-01 | 1.62E+00 | 1.62E+00 | 8.38E+00 |
| Hmgb2      | 1.14E+02 | 2.18E-02 | 3.01E-01 | 1.62E+00 | 1.62E+00 | 2.36E+01 |
| Ucp2       | 6.11E+02 | 1.47E-03 | 2.01E-01 | 1.62E+00 | 1.62E+00 | 1.26E+02 |
| St3gal4    | 1.09E+02 | 5.91E-04 | 1.52E-01 | 1.62E+00 | 1.62E+00 | 2.25E+01 |
| Cfh        | 1.68E+01 | 3.34E-02 | 3.11E-01 | 1.62E+00 | 1.62E+00 | 3.47E+00 |
| Foxc2      | 1.69E+01 | 4.01E-03 | 2.52E-01 | 1.62E+00 | 1.62E+00 | 3.48E+00 |
| Cdh19      | 1.53E+01 | 2.13E-02 | 3.01E-01 | 1.62E+00 | 1.62E+00 | 3.15E+00 |
| Mgat5b     | 1.30E+01 | 1.81E-02 | 2.99E-01 | 1.62E+00 | 1.62E+00 | 2.68E+00 |
| Egfl8      | 1.06E+01 | 1.05E-02 | 2.90E-01 | 1.62E+00 | 1.62E+00 | 2.17E+00 |
| Has2       | 9.53E+01 | 1.28E-03 | 2.01E-01 | 1.61E+00 | 1.61E+00 | 1.96E+01 |
| Ndr4       | 1.49E+02 | 2.73E-03 | 2.33E-01 | 1.61E+00 | 1.61E+00 | 3.06E+01 |
| Ly6e       | 4.01E+02 | 4.95E-04 | 1.43E-01 | 1.61E+00 | 1.61E+00 | 8.25E+01 |
| Arl4c      | 1.38E+02 | 1.32E-03 | 2.01E-01 | 1.61E+00 | 1.61E+00 | 2.85E+01 |
| Mmp23      | 2.16E+01 | 1.81E-02 | 2.99E-01 | 1.61E+00 | 1.61E+00 | 4.44E+00 |
| Pik3ip1    | 3.81E+01 | 3.63E-03 | 2.44E-01 | 1.61E+00 | 1.61E+00 | 7.83E+00 |
| Loxl4      | 7.02E+00 | 1.74E-02 | 2.99E-01 | 1.61E+00 | 1.61E+00 | 1.44E+00 |
| Ttk        | 3.92E+01 | 8.25E-03 | 2.79E-01 | 1.61E+00 | 1.61E+00 | 8.06E+00 |
| Ccdc177    | 9.81E+00 | 1.86E-02 | 3.01E-01 | 1.61E+00 | 1.61E+00 | 2.02E+00 |
| Arsj       | 4.48E+01 | 6.08E-03 | 2.79E-01 | 1.61E+00 | 1.61E+00 | 9.20E+00 |
| Mgmt       | 7.95E+00 | 1.51E-02 | 2.95E-01 | 1.61E+00 | 1.61E+00 | 1.63E+00 |
| Kcnn4      | 6.57E+00 | 4.28E-02 | 3.17E-01 | 1.61E+00 | 1.61E+00 | 1.35E+00 |
| Mcm7       | 1.53E+02 | 2.07E-02 | 3.01E-01 | 1.61E+00 | 1.61E+00 | 3.14E+01 |
| Tll1       | 1.75E+01 | 1.24E-02 | 2.91E-01 | 1.61E+00 | 1.61E+00 | 3.60E+00 |
| Smyd2      | 6.84E+01 | 1.24E-02 | 2.91E-01 | 1.61E+00 | 1.61E+00 | 1.40E+01 |
| Tmem181a   | 8.88E+01 | 3.16E-02 | 3.11E-01 | 1.60E+00 | 1.60E+00 | 1.82E+01 |
| Srgn       | 1.61E+01 | 1.89E-02 | 3.01E-01 | 1.60E+00 | 1.60E+00 | 3.30E+00 |
| Unc5c      | 1.70E+01 | 1.45E-02 | 2.93E-01 | 1.60E+00 | 1.60E+00 | 3.49E+00 |
| P2ry12     | 1.07E+01 | 2.74E-02 | 3.05E-01 | 1.60E+00 | 1.60E+00 | 2.20E+00 |
| Slc1a3     | 1.13E+02 | 1.97E-03 | 2.10E-01 | 1.60E+00 | 1.60E+00 | 2.31E+01 |
| AC132393.1 | 1.80E+01 | 4.47E-02 | 3.17E-01 | 1.60E+00 | 1.60E+00 | 3.68E+00 |
| Mdm1       | 2.89E+01 | 6.37E-03 | 2.79E-01 | 1.60E+00 | 1.60E+00 | 5.93E+00 |
| Thy1       | 8.61E+01 | 2.36E-03 | 2.28E-01 | 1.60E+00 | 1.60E+00 | 1.77E+01 |
| Kntc1      | 3.77E+01 | 1.25E-02 | 2.91E-01 | 1.60E+00 | 1.60E+00 | 7.73E+00 |
| Lipg       | 4.09E+01 | 2.48E-02 | 3.02E-01 | 1.60E+00 | 1.60E+00 | 8.39E+00 |
| Ctsc       | 2.78E+02 | 6.90E-04 | 1.60E-01 | 1.59E+00 | 1.59E+00 | 5.69E+01 |
| Barx2      | 2.89E+02 | 8.51E-03 | 2.79E-01 | 1.59E+00 | 1.59E+00 | 5.92E+01 |
| Figf       | 6.93E+01 | 8.21E-04 | 1.61E-01 | 1.59E+00 | 1.59E+00 | 1.42E+01 |



|             |          |          |          |          |          |          |
|-------------|----------|----------|----------|----------|----------|----------|
| Efcab11     | 9.62E+00 | 3.63E-02 | 3.13E-01 | 1.59E+00 | 1.59E+00 | 1.97E+00 |
| Haus5       | 1.86E+01 | 2.78E-02 | 3.05E-01 | 1.59E+00 | 1.59E+00 | 3.81E+00 |
| Pyroxd2     | 1.64E+01 | 4.86E-02 | 3.19E-01 | 1.59E+00 | 1.59E+00 | 3.36E+00 |
| Gm16534     | 1.52E+01 | 2.28E-02 | 3.01E-01 | 1.59E+00 | 1.59E+00 | 3.11E+00 |
| Bckdhb      | 3.84E+01 | 4.80E-02 | 3.18E-01 | 1.59E+00 | 1.59E+00 | 7.87E+00 |
| Fam20a      | 2.16E+01 | 1.26E-02 | 2.91E-01 | 1.59E+00 | 1.59E+00 | 4.43E+00 |
| Rab30       | 3.11E+01 | 1.49E-03 | 2.02E-01 | 1.59E+00 | 1.59E+00 | 6.37E+00 |
| Ptprc       | 1.18E+01 | 2.07E-02 | 3.01E-01 | 1.59E+00 | 1.59E+00 | 2.41E+00 |
| Lancl3      | 7.10E+00 | 2.31E-02 | 3.01E-01 | 1.59E+00 | 1.59E+00 | 1.45E+00 |
| Gm14328     | 2.86E+02 | 2.21E-02 | 3.01E-01 | 1.59E+00 | 1.59E+00 | 5.84E+01 |
| Sox10       | 9.55E+01 | 1.07E-02 | 2.90E-01 | 1.59E+00 | 1.59E+00 | 1.95E+01 |
| Dpyd        | 2.64E+01 | 8.07E-03 | 2.79E-01 | 1.59E+00 | 1.59E+00 | 5.40E+00 |
| Fahd2a      | 1.65E+01 | 3.61E-02 | 3.12E-01 | 1.58E+00 | 1.58E+00 | 3.37E+00 |
| Scube3      | 6.04E+01 | 1.92E-03 | 2.10E-01 | 1.58E+00 | 1.58E+00 | 1.23E+01 |
| Col4a6      | 2.00E+02 | 8.33E-03 | 2.79E-01 | 1.58E+00 | 1.58E+00 | 4.08E+01 |
| Myof        | 1.44E+02 | 1.37E-02 | 2.93E-01 | 1.58E+00 | 1.58E+00 | 2.95E+01 |
| Edil3       | 1.13E+01 | 4.10E-02 | 3.17E-01 | 1.58E+00 | 1.58E+00 | 2.31E+00 |
| Alox12      | 8.29E+01 | 2.52E-02 | 3.02E-01 | 1.58E+00 | 1.58E+00 | 1.69E+01 |
| 9330154J02R | 8.45E+00 | 1.37E-02 | 2.93E-01 | 1.58E+00 | 1.58E+00 | 1.72E+00 |
| Trpc4       | 1.43E+01 | 3.69E-02 | 3.15E-01 | 1.58E+00 | 1.58E+00 | 2.93E+00 |
| Pdgfc       | 8.40E+01 | 1.38E-03 | 2.01E-01 | 1.58E+00 | 1.58E+00 | 1.71E+01 |
| Kif18a      | 3.78E+01 | 2.84E-03 | 2.33E-01 | 1.57E+00 | 1.57E+00 | 7.71E+00 |
| Rgs11       | 2.54E+01 | 2.77E-02 | 3.05E-01 | 1.57E+00 | 1.57E+00 | 5.18E+00 |
| Paqr6       | 9.73E+00 | 4.69E-02 | 3.17E-01 | 1.57E+00 | 1.57E+00 | 1.98E+00 |
| Ccdc106     | 2.54E+01 | 7.14E-03 | 2.79E-01 | 1.57E+00 | 1.57E+00 | 5.18E+00 |
| Fblim1      | 6.58E+01 | 1.56E-03 | 2.02E-01 | 1.57E+00 | 1.57E+00 | 1.34E+01 |
| Gm29397     | 3.66E+01 | 4.62E-02 | 3.17E-01 | 1.57E+00 | 1.57E+00 | 7.45E+00 |
| Anxa2       | 8.76E+02 | 6.08E-03 | 2.79E-01 | 1.57E+00 | 1.57E+00 | 1.78E+02 |
| Cyth4       | 2.06E+01 | 1.29E-02 | 2.93E-01 | 1.57E+00 | 1.57E+00 | 4.20E+00 |
| Ugt1a7c     | 3.21E+01 | 3.55E-02 | 3.11E-01 | 1.57E+00 | 1.57E+00 | 6.52E+00 |
| Adamts18    | 5.38E+01 | 6.17E-03 | 2.79E-01 | 1.57E+00 | 1.57E+00 | 1.10E+01 |
| Nacad       | 6.75E+00 | 2.47E-02 | 3.02E-01 | 1.57E+00 | 1.57E+00 | 1.37E+00 |
| Oplah       | 7.31E+01 | 1.68E-02 | 2.98E-01 | 1.57E+00 | 1.57E+00 | 1.49E+01 |
| Gm16379     | 3.86E+01 | 2.81E-02 | 3.05E-01 | 1.57E+00 | 1.57E+00 | 7.85E+00 |
| Adcy7       | 1.09E+02 | 7.88E-04 | 1.61E-01 | 1.57E+00 | 1.57E+00 | 2.21E+01 |
| Cp          | 1.32E+01 | 3.29E-02 | 3.11E-01 | 1.57E+00 | 1.57E+00 | 2.68E+00 |
| Sv2b        | 2.32E+01 | 1.60E-02 | 2.97E-01 | 1.57E+00 | 1.57E+00 | 4.72E+00 |
| Cpne8       | 4.75E+01 | 7.25E-03 | 2.79E-01 | 1.57E+00 | 1.57E+00 | 9.66E+00 |
| Tcf7        | 3.62E+01 | 8.98E-03 | 2.79E-01 | 1.56E+00 | 1.56E+00 | 7.35E+00 |
| Tmem237     | 2.08E+01 | 3.21E-02 | 3.11E-01 | 1.56E+00 | 1.56E+00 | 4.22E+00 |
| Wee1        | 3.62E+01 | 2.67E-02 | 3.04E-01 | 1.56E+00 | 1.56E+00 | 7.36E+00 |
| N6amt2      | 2.53E+01 | 3.81E-02 | 3.17E-01 | 1.56E+00 | 1.56E+00 | 5.13E+00 |
| Tnfrsf11a   | 1.56E+01 | 1.22E-02 | 2.91E-01 | 1.56E+00 | 1.56E+00 | 3.17E+00 |

|             |          |          |          |          |          |          |
|-------------|----------|----------|----------|----------|----------|----------|
| Cstb        | 1.08E+02 | 1.34E-02 | 2.93E-01 | 1.56E+00 | 1.56E+00 | 2.19E+01 |
| Mkx         | 2.21E+01 | 3.17E-03 | 2.35E-01 | 1.56E+00 | 1.56E+00 | 4.49E+00 |
| Lrat        | 1.31E+01 | 3.84E-02 | 3.17E-01 | 1.56E+00 | 1.56E+00 | 2.66E+00 |
| Spo11       | 2.21E+01 | 1.04E-02 | 2.90E-01 | 1.56E+00 | 1.56E+00 | 4.49E+00 |
| Rpl35a-ps5  | 7.19E+00 | 4.08E-02 | 3.17E-01 | 1.56E+00 | 1.56E+00 | 1.46E+00 |
| Rplp0       | 1.65E+03 | 3.38E-02 | 3.11E-01 | 1.56E+00 | 1.56E+00 | 3.35E+02 |
| Gm20467     | 1.59E+01 | 3.62E-02 | 3.12E-01 | 1.56E+00 | 1.56E+00 | 3.22E+00 |
| 1700030J22R | 7.73E+00 | 2.05E-02 | 3.01E-01 | 1.56E+00 | 1.56E+00 | 1.57E+00 |
| Gm19807     | 3.76E+01 | 7.74E-03 | 2.79E-01 | 1.55E+00 | 1.55E+00 | 7.63E+00 |
| Khdrbs3     | 2.75E+01 | 4.47E-02 | 3.17E-01 | 1.55E+00 | 1.55E+00 | 5.58E+00 |
| Poc1a       | 1.44E+01 | 2.02E-02 | 3.01E-01 | 1.55E+00 | 1.55E+00 | 2.93E+00 |
| Azin2       | 2.90E+01 | 6.33E-03 | 2.79E-01 | 1.55E+00 | 1.55E+00 | 5.88E+00 |
| Angptl4     | 2.41E+01 | 3.14E-03 | 2.35E-01 | 1.55E+00 | 1.55E+00 | 4.88E+00 |
| Fcgr3       | 2.90E+01 | 8.89E-03 | 2.79E-01 | 1.55E+00 | 1.55E+00 | 5.88E+00 |
| Cdc25c      | 1.88E+01 | 2.73E-02 | 3.05E-01 | 1.55E+00 | 1.55E+00 | 3.82E+00 |
| Fbln2       | 2.81E+02 | 2.09E-03 | 2.14E-01 | 1.55E+00 | 1.55E+00 | 5.69E+01 |
| Ldhd        | 7.99E+00 | 1.62E-02 | 2.97E-01 | 1.55E+00 | 1.55E+00 | 1.62E+00 |
| Nckap1l     | 1.85E+01 | 3.46E-02 | 3.11E-01 | 1.55E+00 | 1.55E+00 | 3.74E+00 |
| Tap1        | 2.69E+01 | 1.37E-02 | 2.93E-01 | 1.55E+00 | 1.55E+00 | 5.46E+00 |
| Dmtn        | 1.18E+01 | 1.76E-02 | 2.99E-01 | 1.55E+00 | 1.55E+00 | 2.39E+00 |
| Fam216a     | 2.94E+01 | 2.78E-02 | 3.05E-01 | 1.55E+00 | 1.55E+00 | 5.95E+00 |
| Stag3       | 2.45E+01 | 4.29E-02 | 3.17E-01 | 1.55E+00 | 1.55E+00 | 4.96E+00 |
| Syt9        | 2.43E+01 | 3.79E-03 | 2.45E-01 | 1.54E+00 | 1.54E+00 | 4.91E+00 |
| Cat         | 2.55E+02 | 4.76E-03 | 2.75E-01 | 1.54E+00 | 1.54E+00 | 5.16E+01 |
| Kctd14      | 2.78E+01 | 1.63E-02 | 2.97E-01 | 1.54E+00 | 1.54E+00 | 5.62E+00 |
| Krt17       | 3.85E+03 | 1.73E-02 | 2.99E-01 | 1.54E+00 | 1.54E+00 | 7.78E+02 |
| Snph        | 1.57E+01 | 1.12E-02 | 2.90E-01 | 1.54E+00 | 1.54E+00 | 3.17E+00 |
| Muc20       | 6.55E+00 | 4.31E-02 | 3.17E-01 | 1.54E+00 | 1.54E+00 | 1.32E+00 |
| Mecr        | 2.78E+01 | 3.82E-02 | 3.17E-01 | 1.54E+00 | 1.54E+00 | 5.63E+00 |
| Sp3os       | 8.92E+00 | 1.51E-02 | 2.95E-01 | 1.54E+00 | 1.54E+00 | 1.80E+00 |
| Enkd1       | 2.69E+01 | 1.11E-02 | 2.90E-01 | 1.54E+00 | 1.54E+00 | 5.43E+00 |
| Ypel4       | 1.01E+01 | 2.86E-02 | 3.08E-01 | 1.54E+00 | 1.54E+00 | 2.05E+00 |
| Cd302       | 2.23E+01 | 4.60E-02 | 3.17E-01 | 1.54E+00 | 1.54E+00 | 4.50E+00 |
| Gm8210      | 1.31E+02 | 4.11E-02 | 3.17E-01 | 1.54E+00 | 1.54E+00 | 2.65E+01 |
| Mctp1       | 8.46E+00 | 2.23E-02 | 3.01E-01 | 1.54E+00 | 1.54E+00 | 1.71E+00 |
| Fam155a     | 1.68E+01 | 1.40E-02 | 2.93E-01 | 1.54E+00 | 1.54E+00 | 3.39E+00 |
| Pgm3        | 2.37E+01 | 2.89E-02 | 3.08E-01 | 1.54E+00 | 1.54E+00 | 4.78E+00 |
| Mpped1      | 1.83E+01 | 4.34E-02 | 3.17E-01 | 1.53E+00 | 1.53E+00 | 3.70E+00 |
| Krt5        | 1.17E+04 | 2.35E-02 | 3.02E-01 | 1.53E+00 | 1.53E+00 | 2.36E+03 |
| Fam210b     | 1.38E+02 | 1.94E-03 | 2.10E-01 | 1.53E+00 | 1.53E+00 | 2.78E+01 |
| S100a6      | 2.73E+02 | 1.07E-02 | 2.90E-01 | 1.53E+00 | 1.53E+00 | 5.50E+01 |
| Ecm1        | 3.67E+02 | 3.51E-02 | 3.11E-01 | 1.53E+00 | 1.53E+00 | 7.39E+01 |
| Irak1bp1    | 2.22E+01 | 4.59E-02 | 3.17E-01 | 1.53E+00 | 1.53E+00 | 4.48E+00 |

|             |          |          |          |          |          |          |
|-------------|----------|----------|----------|----------|----------|----------|
| Dpt         | 9.33E+02 | 2.33E-03 | 2.28E-01 | 1.53E+00 | 1.53E+00 | 1.88E+02 |
| Gcnt1       | 3.97E+01 | 1.58E-02 | 2.97E-01 | 1.53E+00 | 1.53E+00 | 8.00E+00 |
| Tatdn3      | 2.22E+01 | 4.19E-03 | 2.58E-01 | 1.53E+00 | 1.53E+00 | 4.47E+00 |
| Fam92a      | 7.86E+01 | 4.27E-02 | 3.17E-01 | 1.53E+00 | 1.53E+00 | 1.58E+01 |
| Dzank1      | 7.39E+00 | 2.14E-02 | 3.01E-01 | 1.53E+00 | 1.53E+00 | 1.49E+00 |
| Gm6682      | 1.10E+02 | 3.29E-02 | 3.11E-01 | 1.53E+00 | 1.53E+00 | 2.21E+01 |
| Tcap        | 1.60E+02 | 4.35E-04 | 1.40E-01 | 1.53E+00 | 1.53E+00 | 3.22E+01 |
| Kif23       | 1.04E+02 | 1.31E-02 | 2.93E-01 | 1.53E+00 | 1.53E+00 | 2.10E+01 |
| Igfbp6      | 5.68E+01 | 7.97E-03 | 2.79E-01 | 1.53E+00 | 1.53E+00 | 1.14E+01 |
| Artn        | 2.11E+01 | 2.57E-02 | 3.02E-01 | 1.53E+00 | 1.53E+00 | 4.26E+00 |
| 1700088E04F | 8.34E+00 | 4.62E-02 | 3.17E-01 | 1.53E+00 | 1.53E+00 | 1.68E+00 |
| Pdlim4      | 1.32E+02 | 2.88E-02 | 3.08E-01 | 1.53E+00 | 1.53E+00 | 2.66E+01 |
| Sfrp2       | 1.95E+02 | 1.18E-02 | 2.91E-01 | 1.52E+00 | 1.52E+00 | 3.92E+01 |
| Elf3        | 7.07E+01 | 4.25E-02 | 3.17E-01 | 1.52E+00 | 1.52E+00 | 1.42E+01 |
| Serpib9     | 2.60E+01 | 8.23E-03 | 2.79E-01 | 1.52E+00 | 1.52E+00 | 5.23E+00 |
| Duoxa1      | 1.25E+02 | 2.21E-02 | 3.01E-01 | 1.52E+00 | 1.52E+00 | 2.51E+01 |
| Orc6        | 6.16E+01 | 8.47E-03 | 2.79E-01 | 1.52E+00 | 1.52E+00 | 1.24E+01 |
| Hmgb1       | 4.31E+02 | 5.63E-03 | 2.79E-01 | 1.52E+00 | 1.52E+00 | 8.67E+01 |
| Sh3rf2      | 1.18E+02 | 1.77E-02 | 2.99E-01 | 1.52E+00 | 1.52E+00 | 2.38E+01 |
| Lrig3       | 2.11E+02 | 5.60E-03 | 2.79E-01 | 1.52E+00 | 1.52E+00 | 4.24E+01 |
| Cpne7       | 2.52E+01 | 2.19E-02 | 3.01E-01 | 1.52E+00 | 1.52E+00 | 5.08E+00 |
| Esm1        | 2.11E+01 | 1.41E-02 | 2.93E-01 | 1.52E+00 | 1.52E+00 | 4.25E+00 |
| Pfkp        | 1.60E+02 | 1.19E-02 | 2.91E-01 | 1.52E+00 | 1.52E+00 | 3.21E+01 |
| Mnd1-ps     | 2.17E+01 | 3.31E-02 | 3.11E-01 | 1.52E+00 | 1.52E+00 | 4.37E+00 |
| Prr7        | 2.16E+01 | 8.66E-03 | 2.79E-01 | 1.52E+00 | 1.52E+00 | 4.34E+00 |
| Has3        | 2.77E+02 | 1.46E-02 | 2.93E-01 | 1.52E+00 | 1.52E+00 | 5.56E+01 |
| Cfap36      | 3.94E+01 | 2.87E-02 | 3.08E-01 | 1.52E+00 | 1.52E+00 | 7.93E+00 |
| Gm10125     | 1.09E+01 | 1.25E-02 | 2.91E-01 | 1.52E+00 | 1.52E+00 | 2.20E+00 |
| Il17d       | 2.19E+01 | 1.58E-02 | 2.97E-01 | 1.52E+00 | 1.52E+00 | 4.40E+00 |
| Efcc1       | 8.58E+00 | 3.48E-02 | 3.11E-01 | 1.52E+00 | 1.52E+00 | 1.72E+00 |
| Gm10169     | 1.71E+02 | 4.11E-02 | 3.17E-01 | 1.52E+00 | 1.52E+00 | 3.44E+01 |
| Rps26       | 1.35E+02 | 4.90E-02 | 3.19E-01 | 1.52E+00 | 1.52E+00 | 2.71E+01 |
| Adgrd1      | 4.86E+01 | 1.39E-02 | 2.93E-01 | 1.51E+00 | 1.51E+00 | 9.76E+00 |
| Tapbpl      | 1.59E+01 | 9.42E-03 | 2.82E-01 | 1.51E+00 | 1.51E+00 | 3.18E+00 |
| Flnb        | 4.33E+02 | 2.54E-03 | 2.31E-01 | 1.51E+00 | 1.51E+00 | 8.70E+01 |
| Vat1l       | 1.71E+01 | 3.64E-02 | 3.13E-01 | 1.51E+00 | 1.51E+00 | 3.44E+00 |
| Mamdc2      | 1.07E+01 | 2.39E-02 | 3.02E-01 | 1.51E+00 | 1.51E+00 | 2.15E+00 |
| Utp14b      | 6.64E+01 | 5.39E-03 | 2.79E-01 | 1.51E+00 | 1.51E+00 | 1.33E+01 |
| Cenpl       | 5.89E+01 | 1.96E-03 | 2.10E-01 | 1.51E+00 | 1.51E+00 | 1.18E+01 |
| Abi3bp      | 1.20E+02 | 1.82E-02 | 3.00E-01 | 1.51E+00 | 1.51E+00 | 2.41E+01 |
| Susd1       | 1.60E+01 | 3.17E-02 | 3.11E-01 | 1.51E+00 | 1.51E+00 | 3.21E+00 |
| Col14a1     | 2.68E+02 | 1.30E-02 | 2.93E-01 | 1.51E+00 | 1.51E+00 | 5.37E+01 |
| Edar        | 7.70E+00 | 4.16E-02 | 3.17E-01 | 1.51E+00 | 1.51E+00 | 1.54E+00 |

|             |          |          |          |          |          |          |
|-------------|----------|----------|----------|----------|----------|----------|
| Lgals7      | 5.51E+02 | 4.07E-02 | 3.17E-01 | 1.51E+00 | 1.51E+00 | 1.11E+02 |
| Ell2        | 2.30E+02 | 2.56E-02 | 3.02E-01 | 1.51E+00 | 1.51E+00 | 4.61E+01 |
| Ints8       | 6.20E+01 | 3.67E-02 | 3.14E-01 | 1.51E+00 | 1.51E+00 | 1.24E+01 |
| Cep70       | 2.29E+01 | 8.10E-03 | 2.79E-01 | 1.51E+00 | 1.51E+00 | 4.60E+00 |
| 2700062C07F | 2.39E+01 | 2.91E-02 | 3.09E-01 | 1.51E+00 | 1.51E+00 | 4.79E+00 |
| Plaur       | 1.03E+01 | 2.45E-02 | 3.02E-01 | 1.51E+00 | 1.51E+00 | 2.06E+00 |
| Bub1        | 6.25E+01 | 3.34E-02 | 3.11E-01 | 1.51E+00 | 1.51E+00 | 1.25E+01 |
| 5530601H04F | 5.86E+01 | 1.40E-03 | 2.01E-01 | 1.51E+00 | 1.51E+00 | 1.17E+01 |
| Slco4a1     | 2.88E+01 | 2.16E-02 | 3.01E-01 | 1.51E+00 | 1.51E+00 | 5.78E+00 |
| Gm6485      | 1.55E+02 | 3.58E-02 | 3.11E-01 | 1.51E+00 | 1.51E+00 | 3.10E+01 |
| Engase      | 2.52E+01 | 1.51E-02 | 2.95E-01 | 1.51E+00 | 1.51E+00 | 5.04E+00 |
| Gm43609     | 8.94E+00 | 4.10E-02 | 3.17E-01 | 1.51E+00 | 1.51E+00 | 1.79E+00 |
| Prom1       | 4.43E+01 | 3.46E-02 | 3.11E-01 | 1.51E+00 | 1.51E+00 | 8.88E+00 |
| Ptn         | 4.45E+02 | 1.11E-03 | 1.90E-01 | 1.51E+00 | 1.51E+00 | 8.92E+01 |
| Stx1a       | 4.22E+01 | 1.87E-03 | 2.10E-01 | 1.51E+00 | 1.51E+00 | 8.45E+00 |
| Ucp3        | 1.01E+01 | 4.87E-02 | 3.19E-01 | 1.50E+00 | 1.50E+00 | 2.02E+00 |
| Cdh24       | 4.01E+01 | 2.71E-03 | 2.33E-01 | 1.50E+00 | 1.50E+00 | 8.03E+00 |
| Gas8        | 2.87E+01 | 4.76E-02 | 3.18E-01 | 1.50E+00 | 1.50E+00 | 5.75E+00 |
| Fam184b     | 1.14E+01 | 4.81E-02 | 3.18E-01 | 1.50E+00 | 1.50E+00 | 2.29E+00 |
| Osr1        | 6.40E+01 | 2.83E-03 | 2.33E-01 | 1.50E+00 | 1.50E+00 | 1.28E+01 |
| Mgarp       | 2.04E+01 | 4.43E-02 | 3.17E-01 | 1.50E+00 | 1.50E+00 | 4.08E+00 |
| Gm13597     | 4.98E+01 | 2.54E-02 | 3.02E-01 | 1.50E+00 | 1.50E+00 | 9.97E+00 |
| Mmp2        | 9.97E+02 | 5.56E-03 | 2.79E-01 | 1.50E+00 | 1.50E+00 | 1.99E+02 |
| Rgs4        | 2.67E+01 | 2.80E-02 | 3.05E-01 | 1.50E+00 | 1.50E+00 | 5.35E+00 |
| Cenph       | 2.14E+01 | 4.67E-02 | 3.17E-01 | 1.50E+00 | 1.50E+00 | 4.28E+00 |
| 1700048O20I | 1.56E+01 | 2.43E-02 | 3.02E-01 | 1.50E+00 | 1.50E+00 | 3.12E+00 |
| Klk1b26     | 1.91E+01 | 4.79E-02 | 3.18E-01 | 1.50E+00 | 1.50E+00 | 3.81E+00 |
| H2afz       | 2.91E+02 | 4.78E-02 | 3.18E-01 | 1.50E+00 | 1.50E+00 | 5.82E+01 |
| Lxn         | 4.74E+01 | 1.77E-02 | 2.99E-01 | 1.50E+00 | 1.50E+00 | 9.47E+00 |
| Lrrc4       | 3.49E+01 | 8.34E-03 | 2.79E-01 | 1.50E+00 | 1.50E+00 | 6.96E+00 |
| Dsg3        | 7.33E+02 | 4.63E-02 | 3.17E-01 | 1.50E+00 | 1.50E+00 | 1.47E+02 |
| Syce2       | 2.08E+01 | 1.99E-02 | 3.01E-01 | 1.50E+00 | 1.50E+00 | 4.15E+00 |
| Chst10      | 1.66E+01 | 9.93E-03 | 2.86E-01 | 1.50E+00 | 1.50E+00 | 3.31E+00 |

### 176 down-reguated gene in Fst-/- (P<=0.05 1.5 Folds change)

| Gene ID | Total counts | P-value (mut) | FDR step up | Ratio (mutant) | Fold change (LSMean(mutant)) | LSMean(mutant) |
|---------|--------------|---------------|-------------|----------------|------------------------------|----------------|
| Slc17a7 | 2.04E+01     | 1.35E-04      | 7.81E-02    | 1.80E-01       | -5.55E+00                    | 1.04E+00       |
| Tmem72  | 4.64E+01     | 6.19E-06      | 1.58E-02    | 1.84E-01       | -5.45E+00                    | 2.40E+00       |
| Rxfp1   | 1.86E+01     | 6.28E-06      | 1.58E-02    | 2.20E-01       | -4.54E+00                    | 1.12E+00       |
| Krt76   | 6.66E+02     | 2.77E-03      | 2.33E-01    | 2.28E-01       | -4.39E+00                    | 4.12E+01       |
| Aqp4    | 1.60E+02     | 6.03E-03      | 2.79E-01    | 2.44E-01       | -4.10E+00                    | 1.05E+01       |
| Hrnr    | 1.65E+02     | 8.38E-04      | 1.61E-01    | 2.44E-01       | -4.09E+00                    | 1.08E+01       |
| Nts     | 8.14E+00     | 5.91E-04      | 1.52E-01    | 2.80E-01       | -3.57E+00                    | 5.94E-01       |

|             |          |          |          |          |           |          |
|-------------|----------|----------|----------|----------|-----------|----------|
| Otx1        | 1.70E+01 | 7.55E-05 | 5.41E-02 | 2.90E-01 | -3.45E+00 | 1.28E+00 |
| Tchh        | 1.62E+03 | 5.06E-03 | 2.79E-01 | 3.23E-01 | -3.10E+00 | 1.32E+02 |
| Crnn        | 2.77E+02 | 1.03E-02 | 2.89E-01 | 3.26E-01 | -3.07E+00 | 2.27E+01 |
| Mybpc2      | 1.91E+02 | 6.79E-03 | 2.79E-01 | 3.53E-01 | -2.83E+00 | 1.66E+01 |
| Fndc9       | 3.48E+01 | 8.87E-03 | 2.79E-01 | 3.53E-01 | -2.83E+00 | 3.02E+00 |
| Il12a       | 9.92E+00 | 4.89E-02 | 3.19E-01 | 3.67E-01 | -2.72E+00 | 8.88E-01 |
| Muc19       | 5.32E+01 | 4.86E-04 | 1.43E-01 | 3.79E-01 | -2.64E+00 | 4.87E+00 |
| Tmem56      | 6.51E+01 | 5.77E-04 | 1.52E-01 | 3.79E-01 | -2.64E+00 | 5.97E+00 |
| Gpd1        | 2.67E+02 | 3.39E-03 | 2.37E-01 | 3.96E-01 | -2.52E+00 | 2.53E+01 |
| Rpl3l       | 2.05E+01 | 2.03E-02 | 3.01E-01 | 4.08E-01 | -2.45E+00 | 1.98E+00 |
| Pcdh10      | 6.06E+01 | 7.06E-06 | 1.58E-02 | 4.09E-01 | -2.45E+00 | 5.87E+00 |
| Flg         | 8.78E+01 | 7.13E-03 | 2.79E-01 | 4.13E-01 | -2.42E+00 | 8.56E+00 |
| Mstn        | 1.27E+02 | 4.53E-03 | 2.70E-01 | 4.16E-01 | -2.40E+00 | 1.24E+01 |
| Asb15       | 1.27E+01 | 1.62E-03 | 2.04E-01 | 4.25E-01 | -2.36E+00 | 1.26E+00 |
| 2310034C09F | 5.07E+02 | 3.54E-02 | 3.11E-01 | 4.28E-01 | -2.33E+00 | 5.07E+01 |
| Gm2115      | 1.65E+01 | 6.66E-03 | 2.79E-01 | 4.31E-01 | -2.32E+00 | 1.66E+00 |
| Abcb4       | 1.21E+01 | 3.78E-03 | 2.45E-01 | 4.36E-01 | -2.29E+00 | 1.23E+00 |
| Asb11       | 7.29E+00 | 3.02E-02 | 3.10E-01 | 4.40E-01 | -2.27E+00 | 7.42E-01 |
| Gm15759     | 7.33E+00 | 1.75E-02 | 2.99E-01 | 4.43E-01 | -2.26E+00 | 7.50E-01 |
| Kcnf1       | 1.34E+01 | 6.02E-04 | 1.52E-01 | 4.53E-01 | -2.21E+00 | 1.40E+00 |
| Kcnj3       | 5.43E+01 | 3.93E-04 | 1.40E-01 | 4.54E-01 | -2.20E+00 | 5.65E+00 |
| 2310065F04F | 1.07E+01 | 8.97E-03 | 2.79E-01 | 4.59E-01 | -2.18E+00 | 1.12E+00 |
| Fgf6        | 6.11E+01 | 7.32E-05 | 5.41E-02 | 4.61E-01 | -2.17E+00 | 6.43E+00 |
| Krt24       | 4.74E+02 | 2.01E-03 | 2.10E-01 | 4.66E-01 | -2.15E+00 | 5.02E+01 |
| C130080G10I | 7.74E+01 | 5.24E-03 | 2.79E-01 | 4.66E-01 | -2.15E+00 | 8.20E+00 |
| Sprr2g      | 1.97E+01 | 7.71E-03 | 2.79E-01 | 4.68E-01 | -2.14E+00 | 2.09E+00 |
| Cldn2       | 6.28E+01 | 2.24E-03 | 2.24E-01 | 4.68E-01 | -2.14E+00 | 6.68E+00 |
| C130079G13I | 8.85E+00 | 7.31E-03 | 2.79E-01 | 4.72E-01 | -2.12E+00 | 9.45E-01 |
| Myoz1       | 7.00E+02 | 3.77E-03 | 2.45E-01 | 4.73E-01 | -2.12E+00 | 7.49E+01 |
| Krt33b      | 1.11E+01 | 3.45E-02 | 3.11E-01 | 4.83E-01 | -2.07E+00 | 1.20E+00 |
| Lrrc38      | 2.30E+01 | 6.61E-03 | 2.79E-01 | 4.89E-01 | -2.04E+00 | 2.52E+00 |
| Zbed6       | 1.56E+01 | 3.91E-02 | 3.17E-01 | 4.93E-01 | -2.03E+00 | 1.72E+00 |
| Asb12       | 6.06E+01 | 1.13E-03 | 1.92E-01 | 4.97E-01 | -2.01E+00 | 6.71E+00 |
| Tnfrsf13c   | 9.38E+00 | 7.80E-03 | 2.79E-01 | 4.97E-01 | -2.01E+00 | 1.04E+00 |
| Pou4f1      | 7.28E+00 | 2.99E-02 | 3.10E-01 | 4.99E-01 | -2.01E+00 | 8.07E-01 |
| Lce3f       | 1.31E+02 | 3.28E-02 | 3.11E-01 | 5.00E-01 | -2.00E+00 | 1.45E+01 |
| Edn2        | 1.46E+01 | 1.37E-03 | 2.01E-01 | 5.01E-01 | -2.00E+00 | 1.63E+00 |
| Car7        | 1.92E+01 | 1.04E-03 | 1.87E-01 | 5.03E-01 | -1.99E+00 | 2.14E+00 |
| Fam83e      | 9.01E+00 | 1.05E-02 | 2.90E-01 | 5.18E-01 | -1.93E+00 | 1.02E+00 |
| RP23-449F12 | 1.32E+01 | 2.88E-02 | 3.08E-01 | 5.21E-01 | -1.92E+00 | 1.50E+00 |
| AI506816    | 3.40E+02 | 1.45E-02 | 2.93E-01 | 5.22E-01 | -1.92E+00 | 3.88E+01 |
| Pgam2       | 1.11E+03 | 1.84E-02 | 3.01E-01 | 5.24E-01 | -1.91E+00 | 1.28E+02 |
| Teddm2      | 1.16E+01 | 7.69E-03 | 2.79E-01 | 5.24E-01 | -1.91E+00 | 1.33E+00 |

|             |          |          |          |          |           |          |
|-------------|----------|----------|----------|----------|-----------|----------|
| Mylk2       | 1.62E+02 | 3.02E-02 | 3.10E-01 | 5.25E-01 | -1.91E+00 | 1.86E+01 |
| A930038B10f | 1.63E+01 | 2.99E-02 | 3.10E-01 | 5.25E-01 | -1.91E+00 | 1.87E+00 |
| Mas1        | 8.59E+00 | 2.25E-02 | 3.01E-01 | 5.32E-01 | -1.88E+00 | 9.94E-01 |
| Asb18       | 1.30E+01 | 6.02E-03 | 2.79E-01 | 5.33E-01 | -1.88E+00 | 1.51E+00 |
| Fbxl22      | 1.11E+02 | 7.78E-04 | 1.61E-01 | 5.33E-01 | -1.88E+00 | 1.28E+01 |
| Casq1       | 1.26E+03 | 9.73E-03 | 2.85E-01 | 5.38E-01 | -1.86E+00 | 1.47E+02 |
| Car14       | 7.54E+01 | 4.60E-03 | 2.71E-01 | 5.39E-01 | -1.85E+00 | 8.80E+00 |
| Cacng6      | 6.23E+01 | 6.99E-03 | 2.79E-01 | 5.40E-01 | -1.85E+00 | 7.28E+00 |
| Kcnk2       | 3.61E+01 | 3.66E-03 | 2.44E-01 | 5.41E-01 | -1.85E+00 | 4.23E+00 |
| Otud7a      | 1.24E+01 | 1.15E-02 | 2.91E-01 | 5.42E-01 | -1.85E+00 | 1.45E+00 |
| Akap5       | 1.37E+01 | 8.11E-03 | 2.79E-01 | 5.45E-01 | -1.83E+00 | 1.61E+00 |
| Cmb1        | 6.04E+01 | 3.07E-02 | 3.11E-01 | 5.45E-01 | -1.83E+00 | 7.11E+00 |
| Gm16170     | 1.02E+01 | 2.29E-02 | 3.01E-01 | 5.51E-01 | -1.82E+00 | 1.21E+00 |
| Ccdc69      | 2.18E+01 | 1.69E-02 | 2.98E-01 | 5.51E-01 | -1.81E+00 | 2.58E+00 |
| Tmem233     | 4.53E+01 | 9.99E-03 | 2.86E-01 | 5.52E-01 | -1.81E+00 | 5.38E+00 |
| Tbx15       | 3.79E+02 | 2.49E-03 | 2.29E-01 | 5.53E-01 | -1.81E+00 | 4.50E+01 |
| Arhgap36    | 1.68E+03 | 3.17E-03 | 2.35E-01 | 5.53E-01 | -1.81E+00 | 1.99E+02 |
| Mpv17l      | 3.94E+01 | 1.42E-02 | 2.93E-01 | 5.54E-01 | -1.80E+00 | 4.69E+00 |
| Lrp2bp      | 2.63E+01 | 9.21E-03 | 2.79E-01 | 5.56E-01 | -1.80E+00 | 3.13E+00 |
| 6430571L13R | 3.09E+01 | 5.41E-03 | 2.79E-01 | 5.57E-01 | -1.79E+00 | 3.68E+00 |
| 4632404M16  | 2.93E+01 | 7.36E-04 | 1.61E-01 | 5.58E-01 | -1.79E+00 | 3.50E+00 |
| Gm26899     | 3.38E+01 | 7.88E-03 | 2.79E-01 | 5.58E-01 | -1.79E+00 | 4.03E+00 |
| Mlxipl      | 1.31E+01 | 4.08E-02 | 3.17E-01 | 5.59E-01 | -1.79E+00 | 1.56E+00 |
| Klhl3       | 1.54E+01 | 5.77E-03 | 2.79E-01 | 5.60E-01 | -1.79E+00 | 1.84E+00 |
| Plcd4       | 2.66E+01 | 1.97E-02 | 3.01E-01 | 5.62E-01 | -1.78E+00 | 3.19E+00 |
| Atp1b2      | 3.11E+02 | 2.08E-02 | 3.01E-01 | 5.63E-01 | -1.78E+00 | 3.73E+01 |
| Il15ra      | 9.53E+00 | 1.98E-02 | 3.01E-01 | 5.63E-01 | -1.77E+00 | 1.15E+00 |
| B3galt2     | 4.07E+01 | 4.14E-02 | 3.17E-01 | 5.65E-01 | -1.77E+00 | 4.89E+00 |
| Kcnk13      | 1.99E+01 | 3.67E-02 | 3.14E-01 | 5.66E-01 | -1.77E+00 | 2.40E+00 |
| Dnaic1      | 1.84E+01 | 2.28E-03 | 2.27E-01 | 5.67E-01 | -1.77E+00 | 2.22E+00 |
| Pgm2        | 5.76E+02 | 9.85E-03 | 2.86E-01 | 5.67E-01 | -1.76E+00 | 6.95E+01 |
| Gm15737     | 1.35E+01 | 3.68E-03 | 2.44E-01 | 5.67E-01 | -1.76E+00 | 1.63E+00 |
| Ddit4l      | 5.95E+01 | 1.62E-03 | 2.04E-01 | 5.68E-01 | -1.76E+00 | 7.18E+00 |
| Ifit1       | 9.43E+00 | 3.39E-02 | 3.11E-01 | 5.69E-01 | -1.76E+00 | 1.14E+00 |
| Nkx2-5      | 1.34E+02 | 1.13E-02 | 2.90E-01 | 5.70E-01 | -1.76E+00 | 1.62E+01 |
| Dhrs7c      | 2.20E+02 | 2.10E-02 | 3.01E-01 | 5.71E-01 | -1.75E+00 | 2.67E+01 |
| Sprr1b      | 7.48E+01 | 3.43E-02 | 3.11E-01 | 5.72E-01 | -1.75E+00 | 9.07E+00 |
| 4833412C05f | 9.06E+00 | 6.18E-03 | 2.79E-01 | 5.74E-01 | -1.74E+00 | 1.10E+00 |
| Phka1       | 1.49E+02 | 4.49E-02 | 3.17E-01 | 5.74E-01 | -1.74E+00 | 1.82E+01 |
| Scn4b       | 1.13E+01 | 2.54E-02 | 3.02E-01 | 5.78E-01 | -1.73E+00 | 1.38E+00 |
| 1810041L15R | 2.99E+02 | 1.44E-03 | 2.01E-01 | 5.80E-01 | -1.72E+00 | 3.66E+01 |
| Trim7       | 6.70E+01 | 3.26E-02 | 3.11E-01 | 5.81E-01 | -1.72E+00 | 8.20E+00 |
| Gatm        | 1.24E+03 | 2.56E-02 | 3.02E-01 | 5.81E-01 | -1.72E+00 | 1.52E+02 |

|             |          |          |          |          |           |          |
|-------------|----------|----------|----------|----------|-----------|----------|
| 2310002L09R | 1.45E+02 | 1.62E-02 | 2.97E-01 | 5.81E-01 | -1.72E+00 | 1.78E+01 |
| Pygm        | 2.25E+03 | 1.80E-02 | 2.99E-01 | 5.83E-01 | -1.72E+00 | 2.76E+02 |
| Mlf1        | 5.91E+01 | 4.04E-02 | 3.17E-01 | 5.83E-01 | -1.71E+00 | 7.26E+00 |
| Kcnb2       | 7.44E+00 | 2.04E-02 | 3.01E-01 | 5.85E-01 | -1.71E+00 | 9.15E-01 |
| Gm10727     | 1.80E+01 | 2.35E-02 | 3.02E-01 | 5.85E-01 | -1.71E+00 | 2.21E+00 |
| Tgm2        | 6.90E+02 | 7.17E-04 | 1.60E-01 | 5.87E-01 | -1.70E+00 | 8.51E+01 |
| Gm37691     | 1.45E+01 | 6.25E-03 | 2.79E-01 | 5.87E-01 | -1.70E+00 | 1.79E+00 |
| Fsd2        | 2.19E+02 | 1.03E-03 | 1.87E-01 | 5.88E-01 | -1.70E+00 | 2.70E+01 |
| Rassf4      | 2.11E+02 | 3.21E-03 | 2.35E-01 | 5.91E-01 | -1.69E+00 | 2.62E+01 |
| Lingo3      | 1.86E+01 | 1.23E-02 | 2.91E-01 | 5.93E-01 | -1.69E+00 | 2.31E+00 |
| Gipr        | 4.01E+01 | 3.43E-02 | 3.11E-01 | 5.95E-01 | -1.68E+00 | 4.99E+00 |
| Rprm        | 9.33E+00 | 1.63E-02 | 2.97E-01 | 5.97E-01 | -1.68E+00 | 1.16E+00 |
| Rundc3a     | 2.75E+01 | 3.52E-02 | 3.11E-01 | 5.97E-01 | -1.67E+00 | 3.43E+00 |
| Adora1      | 1.31E+02 | 5.42E-03 | 2.79E-01 | 5.98E-01 | -1.67E+00 | 1.64E+01 |
| Gpt2        | 1.94E+02 | 5.34E-03 | 2.79E-01 | 6.03E-01 | -1.66E+00 | 2.43E+01 |
| Irgm2       | 9.72E+01 | 6.11E-04 | 1.52E-01 | 6.04E-01 | -1.66E+00 | 1.22E+01 |
| Slc9a2      | 5.39E+01 | 3.16E-03 | 2.35E-01 | 6.05E-01 | -1.65E+00 | 6.78E+00 |
| Atp1b4      | 3.20E+03 | 1.53E-03 | 2.02E-01 | 6.06E-01 | -1.65E+00 | 4.02E+02 |
| Myocd       | 9.43E+00 | 2.14E-02 | 3.01E-01 | 6.08E-01 | -1.65E+00 | 1.19E+00 |
| Fam131a     | 2.86E+02 | 8.72E-03 | 2.79E-01 | 6.11E-01 | -1.64E+00 | 3.61E+01 |
| Serpinb3b   | 3.34E+01 | 7.30E-03 | 2.79E-01 | 6.12E-01 | -1.64E+00 | 4.22E+00 |
| Cmya5       | 8.64E+02 | 1.42E-03 | 2.01E-01 | 6.12E-01 | -1.63E+00 | 1.09E+02 |
| Gm6088      | 4.90E+01 | 4.42E-02 | 3.17E-01 | 6.13E-01 | -1.63E+00 | 6.20E+00 |
| Popdc2      | 1.32E+02 | 1.50E-02 | 2.95E-01 | 6.14E-01 | -1.63E+00 | 1.68E+01 |
| Aldh1b1     | 2.10E+01 | 1.78E-03 | 2.10E-01 | 6.15E-01 | -1.63E+00 | 2.66E+00 |
| Sh3bgr      | 1.75E+02 | 2.15E-02 | 3.01E-01 | 6.15E-01 | -1.63E+00 | 2.22E+01 |
| Erbp4       | 2.14E+01 | 3.58E-02 | 3.11E-01 | 6.16E-01 | -1.62E+00 | 2.72E+00 |
| Hrc         | 7.15E+02 | 2.13E-03 | 2.15E-01 | 6.17E-01 | -1.62E+00 | 9.09E+01 |
| Wdfy1       | 1.72E+02 | 2.40E-02 | 3.02E-01 | 6.17E-01 | -1.62E+00 | 2.19E+01 |
| Ddo         | 2.12E+01 | 1.22E-02 | 2.91E-01 | 6.18E-01 | -1.62E+00 | 2.70E+00 |
| Sh3kbp1     | 1.84E+02 | 3.66E-03 | 2.44E-01 | 6.19E-01 | -1.62E+00 | 2.35E+01 |
| Mlph        | 1.83E+01 | 1.77E-02 | 2.99E-01 | 6.19E-01 | -1.61E+00 | 2.33E+00 |
| Srl         | 3.77E+03 | 3.53E-03 | 2.43E-01 | 6.21E-01 | -1.61E+00 | 4.81E+02 |
| Gm13394     | 7.94E+02 | 4.41E-02 | 3.17E-01 | 6.21E-01 | -1.61E+00 | 1.01E+02 |
| Col2a1      | 1.91E+01 | 2.14E-02 | 3.01E-01 | 6.23E-01 | -1.61E+00 | 2.45E+00 |
| Cd300lg     | 2.87E+01 | 4.78E-02 | 3.18E-01 | 6.25E-01 | -1.60E+00 | 3.68E+00 |
| Acot11      | 6.53E+01 | 6.29E-04 | 1.53E-01 | 6.25E-01 | -1.60E+00 | 8.37E+00 |
| Casq2       | 3.35E+03 | 5.38E-03 | 2.79E-01 | 6.25E-01 | -1.60E+00 | 4.30E+02 |
| Rabep2      | 1.05E+03 | 3.38E-02 | 3.11E-01 | 6.26E-01 | -1.60E+00 | 1.35E+02 |
| Eno3        | 2.92E+03 | 3.12E-02 | 3.11E-01 | 6.27E-01 | -1.60E+00 | 3.75E+02 |
| Prkaa2      | 2.30E+02 | 3.22E-03 | 2.35E-01 | 6.27E-01 | -1.60E+00 | 2.95E+01 |
| Gm9817      | 3.36E+02 | 2.19E-02 | 3.01E-01 | 6.27E-01 | -1.59E+00 | 4.32E+01 |
| Kcna7       | 2.06E+01 | 2.16E-02 | 3.01E-01 | 6.29E-01 | -1.59E+00 | 2.64E+00 |

|             |          |          |          |          |           |          |
|-------------|----------|----------|----------|----------|-----------|----------|
| Lmcd1       | 3.63E+02 | 5.17E-03 | 2.79E-01 | 6.30E-01 | -1.59E+00 | 4.68E+01 |
| Irs1        | 3.21E+02 | 7.68E-04 | 1.61E-01 | 6.32E-01 | -1.58E+00 | 4.14E+01 |
| Pnpla3      | 3.79E+01 | 8.78E-03 | 2.79E-01 | 6.33E-01 | -1.58E+00 | 4.89E+00 |
| Cyp26b1     | 3.37E+02 | 7.95E-04 | 1.61E-01 | 6.33E-01 | -1.58E+00 | 4.35E+01 |
| Mafa        | 3.91E+01 | 1.63E-02 | 2.97E-01 | 6.34E-01 | -1.58E+00 | 5.06E+00 |
| Adrbk2      | 1.84E+02 | 5.39E-03 | 2.79E-01 | 6.35E-01 | -1.57E+00 | 2.38E+01 |
| Ube2c       | 3.32E+03 | 8.22E-03 | 2.79E-01 | 6.35E-01 | -1.57E+00 | 4.30E+02 |
| Sypl2       | 8.85E+02 | 7.85E-03 | 2.79E-01 | 6.37E-01 | -1.57E+00 | 1.15E+02 |
| Map3k7cl    | 2.34E+02 | 3.15E-03 | 2.35E-01 | 6.37E-01 | -1.57E+00 | 3.04E+01 |
| Slc7a2      | 2.35E+02 | 2.57E-04 | 1.26E-01 | 6.41E-01 | -1.56E+00 | 3.06E+01 |
| Gm26885     | 1.14E+01 | 9.49E-03 | 2.83E-01 | 6.42E-01 | -1.56E+00 | 1.48E+00 |
| Atp2a3      | 7.83E+01 | 1.41E-03 | 2.01E-01 | 6.42E-01 | -1.56E+00 | 1.02E+01 |
| Esrrg       | 2.17E+01 | 3.46E-02 | 3.11E-01 | 6.43E-01 | -1.56E+00 | 2.83E+00 |
| A930016O22  | 7.58E+02 | 2.71E-02 | 3.04E-01 | 6.47E-01 | -1.55E+00 | 9.93E+01 |
| Abra        | 8.43E+01 | 1.08E-02 | 2.90E-01 | 6.49E-01 | -1.54E+00 | 1.11E+01 |
| Uckl1os     | 1.65E+01 | 1.06E-02 | 2.90E-01 | 6.50E-01 | -1.54E+00 | 2.17E+00 |
| Trdn        | 2.80E+02 | 1.03E-02 | 2.89E-01 | 6.53E-01 | -1.53E+00 | 3.68E+01 |
| Upk1b       | 6.76E+01 | 1.94E-02 | 3.01E-01 | 6.53E-01 | -1.53E+00 | 8.90E+00 |
| 8430408G22I | 1.06E+02 | 9.85E-03 | 2.86E-01 | 6.54E-01 | -1.53E+00 | 1.39E+01 |
| Myh8        | 2.22E+04 | 2.93E-02 | 3.10E-01 | 6.55E-01 | -1.53E+00 | 2.93E+03 |
| Asb16       | 4.29E+01 | 8.93E-03 | 2.79E-01 | 6.57E-01 | -1.52E+00 | 5.67E+00 |
| Kcnc4       | 5.39E+01 | 8.77E-03 | 2.79E-01 | 6.57E-01 | -1.52E+00 | 7.13E+00 |
| Gm17281     | 1.28E+01 | 1.65E-02 | 2.97E-01 | 6.58E-01 | -1.52E+00 | 1.69E+00 |
| Stbd1       | 7.45E+02 | 3.63E-03 | 2.44E-01 | 6.58E-01 | -1.52E+00 | 9.86E+01 |
| Kcnn2       | 1.11E+01 | 2.94E-02 | 3.10E-01 | 6.59E-01 | -1.52E+00 | 1.47E+00 |
| Prune2      | 1.14E+02 | 1.48E-02 | 2.95E-01 | 6.59E-01 | -1.52E+00 | 1.52E+01 |
| Speg        | 5.10E+02 | 7.86E-03 | 2.79E-01 | 6.60E-01 | -1.52E+00 | 6.76E+01 |
| Ryr2        | 6.56E+00 | 3.88E-02 | 3.17E-01 | 6.61E-01 | -1.51E+00 | 8.70E-01 |
| Reep1       | 3.44E+02 | 1.40E-02 | 2.93E-01 | 6.61E-01 | -1.51E+00 | 4.56E+01 |
| Plcl2       | 6.79E+01 | 1.36E-02 | 2.93E-01 | 6.61E-01 | -1.51E+00 | 9.01E+00 |
| A930003A15I | 2.84E+01 | 3.14E-02 | 3.11E-01 | 6.62E-01 | -1.51E+00 | 3.77E+00 |
| Igtp        | 1.95E+02 | 8.84E-03 | 2.79E-01 | 6.62E-01 | -1.51E+00 | 2.58E+01 |
| Ankrd9      | 2.20E+02 | 2.55E-02 | 3.02E-01 | 6.63E-01 | -1.51E+00 | 2.92E+01 |
| Cacng1      | 5.54E+02 | 1.45E-02 | 2.93E-01 | 6.64E-01 | -1.51E+00 | 7.37E+01 |
| Synm        | 1.08E+02 | 1.57E-03 | 2.02E-01 | 6.65E-01 | -1.50E+00 | 1.43E+01 |
| Zdbf2       | 1.29E+03 | 8.92E-03 | 2.79E-01 | 6.65E-01 | -1.50E+00 | 1.72E+02 |
| Grik3       | 3.25E+01 | 3.20E-02 | 3.11E-01 | 6.66E-01 | -1.50E+00 | 4.32E+00 |
| Baiap2l2    | 1.20E+01 | 4.09E-02 | 3.17E-01 | 6.66E-01 | -1.50E+00 | 1.60E+00 |
| Mustn1      | 2.13E+02 | 1.54E-02 | 2.95E-01 | 6.67E-01 | -1.50E+00 | 2.84E+01 |
| Camk2a      | 3.79E+02 | 1.10E-02 | 2.90E-01 | 6.68E-01 | -1.50E+00 | 5.06E+01 |



**-, (P<=0.05 1.5 Folds change)**

LSMean(WT) (mutant vs. WT)

4.67E+00

1.32E+00

8.43E-01

1.44E+00

1.36E+00

4.59E-01

1.42E+02

9.50E-01

3.26E+00

1.60E+00

1.37E+01

1.28E+00

1.63E+00

8.68E-01

9.60E+00

7.06E-01

1.26E+01

1.45E+00

1.53E+00

3.20E+00

2.07E+00

1.30E+00

9.98E+00

6.09E+00

1.04E+00

1.40E+00

3.32E+00

1.72E+00

6.86E-01

4.42E+00

2.71E+00

2.22E+00

3.70E+00

7.75E+00

2.45E+00

9.28E+00

6.96E+00

1.45E+00

2.53E+00  
2.25E+01  
3.36E+00  
1.36E+00  
5.21E+00  
2.23E+00  
1.65E+00  
1.58E+00  
7.40E-01  
8.16E+00  
1.32E+00  
4.18E+01  
1.98E+00  
2.23E+00  
1.63E+00  
2.99E+00  
8.11E-01  
1.10E+00  
1.77E+00  
5.49E+01  
1.27E+01  
1.71E+00  
9.72E-01  
1.32E+00  
9.26E-01  
1.44E+00  
8.55E+00  
2.00E+00  
1.81E+00  
1.29E+00  
2.04E+00  
2.38E+00  
3.87E+00  
9.71E-01  
6.14E+00  
1.79E+00  
5.00E+00  
1.12E+00  
2.05E+00  
3.21E+01  
1.03E+00  
5.81E+00  
8.76E-01

1.61E+01  
1.78E+00  
7.63E-01  
3.79E+00  
7.39E-01  
1.10E+00  
4.22E+01  
7.02E-01  
7.33E-01  
8.03E-01  
2.79E+00  
1.40E+00  
2.38E+00  
3.32E+01  
2.52E+00  
5.75E+00  
1.63E+00  
1.11E+00  
3.38E+00  
8.17E-01  
1.75E+00  
1.13E+00  
3.45E+01  
2.76E+00  
2.14E+01  
1.68E+00  
8.08E+00  
3.36E+00  
7.42E+01  
1.10E+00  
8.71E+00  
6.91E+00  
4.26E+00  
8.30E-01  
4.51E+00  
8.67E-01  
3.44E+00  
1.36E+00  
8.64E-01  
1.89E+00  
7.42E-01  
5.48E+00  
8.26E-01

2.72E+00  
1.40E+00  
5.37E+00  
1.31E+00  
2.48E+01  
2.50E+01  
1.49E+00  
1.53E+00  
2.97E+00  
4.98E+00  
5.34E+00  
1.24E+00  
1.03E+00  
2.00E+00  
6.67E+00  
5.00E+00  
5.09E+00  
2.43E+00  
1.14E+02  
9.58E-01  
8.85E+00  
1.08E+00  
7.51E+00  
6.29E+00  
4.32E+00  
1.40E+00  
3.89E+00  
2.21E+00  
8.17E-01  
7.77E+00  
1.49E+00  
9.03E+00  
1.70E+01  
3.23E+01  
8.10E-01  
3.07E+01  
9.89E-01  
1.74E+00  
1.79E+00  
1.86E+00  
8.60E+00  
2.39E+01  
2.49E+00

2.91E+00  
1.12E+00  
1.53E+00  
2.60E+00  
2.32E+01  
8.59E-01  
1.19E+00  
9.57E+00  
7.89E-01  
2.54E+00  
9.50E-01  
1.79E+00  
2.47E+00  
9.08E-01  
1.17E+01  
1.76E+00  
4.12E+01  
1.57E+00  
6.59E+00  
1.09E+00  
1.59E+00  
1.14E+00  
1.93E+00  
8.39E-01  
1.10E+00  
1.56E+00  
1.16E+01  
1.86E+01  
6.09E+00  
1.00E+00  
2.51E+00  
4.49E+00  
1.97E+01  
1.75E+00  
2.49E+00  
5.24E+00  
2.03E+01  
2.35E+00  
2.73E+00  
1.41E+01  
4.68E+00  
9.54E-01  
7.77E+00

3.72E+01  
1.27E+00  
1.40E+00  
8.78E+00  
1.70E+00  
1.29E+00  
1.58E+01  
9.42E-01  
2.28E+00  
1.26E+02  
1.95E+00  
1.03E+01  
3.12E+00  
2.77E+00  
2.95E+00  
5.57E+00  
1.03E+00  
1.25E+00  
5.35E+01  
2.21E+01  
7.03E+00  
2.61E+00  
1.50E+00  
5.34E+00  
8.95E-01  
2.89E+00  
1.57E+00  
4.55E+00  
3.33E+00  
5.73E+00  
1.18E+00  
8.01E-01  
1.27E+00  
2.02E+00  
1.90E+00  
9.39E-01  
1.02E+01  
1.49E+00  
1.06E+00  
1.43E+00  
4.34E+00  
7.82E+00  
3.03E+01

1.08E+00  
9.83E-01  
9.32E-01  
1.33E+01  
6.39E+00  
1.01E+00  
3.76E+00  
5.21E+00  
2.13E+01  
2.19E+00  
1.42E+00  
5.12E+00  
1.56E+01  
1.30E+00  
1.88E+01  
1.45E+00  
1.31E+00  
3.83E+00  
3.02E+00  
9.60E+00  
3.20E+01  
3.47E+00  
5.92E+00  
2.15E+00  
5.41E+00  
3.37E+00  
1.40E+00  
2.32E+01  
6.56E+00  
1.47E+00  
8.64E+00  
5.47E+00  
2.10E+01  
1.16E+00  
3.17E+01  
4.30E+01  
4.12E+00  
1.20E+01  
1.23E+00  
1.15E+00  
1.29E+00  
1.10E+00  
2.46E+00

4.48E+00  
1.00E+00  
1.92E+00  
8.47E+00  
4.71E+01  
5.45E+00  
5.16E+00  
1.45E+01  
7.76E+01  
1.39E+01  
2.14E+00  
2.15E+00  
1.95E+00  
1.66E+00  
1.35E+00  
1.22E+01  
1.90E+01  
5.12E+01  
1.77E+01  
2.76E+00  
4.86E+00  
8.97E-01  
5.01E+00  
1.25E+00  
5.73E+00  
1.02E+00  
8.40E-01  
1.96E+01  
2.24E+00  
8.75E+00  
1.14E+01  
2.06E+00  
2.18E+00  
1.38E+00  
1.44E+01  
2.30E+00  
3.71E+00  
1.10E+01  
4.84E+00  
5.26E+00  
3.57E+01  
3.72E+01  
8.91E+00



1.24E+00  
2.39E+00  
2.11E+00  
1.95E+00  
4.94E+00  
2.78E+00  
4.01E+00  
1.52E+00  
9.15E-01  
3.68E+01  
1.23E+01  
3.41E+00  
2.13E+00  
7.80E+00  
2.58E+01  
1.87E+01  
1.46E+00  
1.07E+01  
1.09E+00  
1.86E+00  
1.09E+01  
4.90E+00  
3.29E+00  
1.26E+00  
3.30E+00  
8.53E+00  
4.74E+00  
1.14E+02  
2.68E+00  
4.16E+00  
6.99E+00  
8.76E-01  
9.49E+00  
5.01E+00  
1.41E+01  
1.71E+00  
3.02E+00  
6.17E+00  
4.70E+00  
2.70E+00  
4.71E+00  
3.29E+00  
2.03E+00

1.40E+01  
2.88E+00  
1.71E+00  
2.89E+00  
9.37E-01  
2.15E+02  
2.07E+00  
1.01E+00  
4.91E+00  
3.59E+00  
1.88E+00  
3.79E+00  
3.15E+00  
3.79E+00  
2.46E+00  
3.67E+01  
1.04E+00  
2.41E+00  
3.52E+00  
1.55E+00  
3.85E+00  
3.21E+00  
3.18E+00  
3.34E+01  
3.64E+00  
5.04E+02  
2.06E+00  
8.59E-01  
3.65E+00  
1.17E+00  
3.52E+00  
1.33E+00  
2.93E+00  
1.72E+01  
1.11E+00  
2.21E+00  
3.12E+00  
2.41E+00  
1.54E+03  
1.81E+01  
3.59E+01  
4.83E+01  
2.92E+00

1.23E+02  
5.23E+00  
2.92E+00  
1.04E+01  
9.74E-01  
1.45E+01  
2.11E+01  
1.37E+01  
7.49E+00  
2.79E+00  
1.10E+00  
1.75E+01  
2.57E+01  
9.33E+00  
3.43E+00  
1.65E+01  
8.13E+00  
5.69E+01  
1.56E+01  
2.79E+01  
3.34E+00  
2.79E+00  
2.11E+01  
2.87E+00  
2.86E+00  
3.66E+01  
5.22E+00  
1.45E+00  
2.90E+00  
1.14E+00  
2.27E+01  
1.79E+01  
6.44E+00  
2.10E+00  
5.74E+01  
2.27E+00  
1.42E+00  
8.80E+00  
7.81E+00  
1.59E+01  
2.12E+00  
3.55E+01  
1.02E+00

7.31E+01  
3.05E+01  
8.24E+00  
3.05E+00  
3.17E+00  
1.37E+00  
8.30E+00  
7.78E+00  
3.83E+00  
2.06E+01  
3.35E+00  
1.19E+00  
5.90E+00  
5.92E+01  
5.61E+00  
1.34E+00  
5.34E+00  
3.82E+00  
1.52E+00  
8.52E+00  
2.71E+00  
6.64E+00  
1.33E+02  
3.57E+00  
2.85E+00  
2.08E+00  
2.54E+00  
3.89E+01  
6.32E+00  
4.65E+00  
9.79E+01  
2.77E+00  
2.21E+00



LSMean(WT) (mutant vs. WT)

5.77E+00  
1.31E+01  
5.08E+00  
1.81E+02  
4.30E+01  
4.41E+01  
2.12E+00

4.40E+00  
4.09E+02  
6.97E+01  
4.70E+01  
8.57E+00  
2.42E+00  
1.29E+01  
1.57E+01  
6.37E+01  
4.86E+00  
1.43E+01  
2.07E+01  
2.98E+01  
2.97E+00  
1.18E+02  
3.85E+00  
2.81E+00  
1.69E+00  
1.69E+00  
3.09E+00  
1.25E+01  
2.44E+00  
1.39E+01  
1.08E+02  
1.76E+01  
4.48E+00  
1.43E+01  
2.00E+00  
1.59E+02  
2.49E+00  
5.16E+00  
3.48E+00  
1.35E+01  
2.09E+00  
1.62E+00  
2.91E+01  
3.25E+00  
4.25E+00  
1.98E+00  
2.89E+00  
7.44E+01  
2.43E+02  
2.54E+00

3.54E+01  
3.56E+00  
1.87E+00  
2.83E+00  
2.40E+01  
2.73E+02  
1.63E+01  
1.35E+01  
7.81E+00  
2.67E+00  
2.95E+00  
1.30E+01  
2.20E+00  
4.68E+00  
9.74E+00  
8.14E+01  
3.60E+02  
8.46E+00  
5.63E+00  
6.61E+00  
6.27E+00  
7.23E+00  
2.79E+00  
3.29E+00  
5.68E+00  
6.63E+01  
2.03E+00  
8.67E+00  
4.24E+00  
3.92E+00  
1.23E+02  
2.87E+00  
1.26E+01  
2.00E+00  
2.85E+01  
4.67E+01  
1.59E+01  
1.92E+00  
3.16E+01  
2.39E+00  
6.31E+01  
1.41E+01  
2.61E+02

3.06E+01  
4.73E+02  
1.25E+01  
1.56E+00  
3.78E+00  
1.45E+02  
3.04E+00  
4.59E+01  
4.43E+01  
3.89E+00  
8.39E+00  
1.95E+00  
5.74E+00  
2.74E+01  
4.03E+01  
2.02E+01  
1.12E+01  
6.63E+02  
1.95E+00  
5.91E+01  
6.90E+00  
1.79E+02  
1.01E+01  
2.73E+01  
4.33E+00  
3.61E+01  
4.42E+00  
1.47E+02  
3.54E+01  
4.37E+00  
3.80E+01  
3.76E+00  
7.76E+02  
1.63E+02  
3.93E+00  
5.90E+00  
1.34E+01  
6.88E+02  
2.15E+02  
5.99E+02  
4.70E+01  
6.89E+01  
4.21E+00

7.42E+01  
6.55E+01  
7.73E+00  
6.88E+01  
7.98E+00  
3.75E+01  
6.76E+02  
1.80E+02  
4.77E+01  
4.78E+01  
2.31E+00  
1.59E+01  
4.41E+00  
1.53E+02  
1.70E+01  
3.34E+00  
5.64E+01  
1.36E+01  
2.13E+01  
4.47E+03  
8.64E+00  
1.08E+01  
2.57E+00  
1.50E+02  
2.23E+00  
2.30E+01  
1.02E+02  
1.32E+00  
6.90E+01  
1.36E+01  
5.70E+00  
3.90E+01  
4.41E+01  
1.11E+02  
2.16E+01  
2.59E+02  
6.50E+00  
2.40E+00  
4.26E+01  
7.57E+01
