# Supplementary material for: Developmental plasticity of epithelial stem cells in tooth and taste bud renewal
Source: PubMed Central journal article supplement — Proc Natl Acad Sci U S A. 2019 Aug 19;116(36):17858–66. doi: 10.1073/pnas.1821202116 (PMC6731641; doi:10.1073/pnas.1821202116), 2019-08-19
Supplement: pnas.1821202116.sd05.pdf [file pnas.1821202116.sd05.pdf]

| <b>Primer name</b> | <b>Primer sequencing</b> |
|--------------------|--------------------------|
| Beta-actin-Forward | ctaaggccaaccgtgaaaag     |
| Beta-actin-Reverse | accagaggcatacagggaca     |
| Bmp7-Forward       | cgagacctccagatcacagt     |
| Bmp7-Reverse       | cagcaagaagaggtccgact     |
| Barx1-Forward      | gctcaagttcggcgtacag      |
| Barx1-Reverse      | cagtgggaactgaacactgc     |
| Dlx1-Forward       | ccggaggtccaacaaact       |
| Dlx1-Reverse       | tctggaaccatatcttgacctg   |
| Foxa2-Forward      | catccgactggagcagcta      |
| Foxa2-Reverse      | gaaagcagtcgtgaaggaga     |
| Gli1-Forward       | caggggaagagagcagactgac   |
| Gli1-Reverse       | cgctgctgcaagaggact       |
| Lgr5-Forward       | gtgtcttttgcctttgacg      |
| Lgr5-Reverse       | tgtcagtccaagaaactggtgt   |
| Msx1-Forward       | gacgccttcaccacagc        |
| Msx1-Reverse       | tactgcttctggcgggaactt    |
| Msx2-Forward       | aggagcccggcagatact       |
| Msx2-Reverse       | gtttcctcaggggtgcaggt     |
| Osr2-Forward       | gggtgtgagggggaaaag       |
| Osr2-Reverse       | gggtgtgagggggaaaag       |
| Pax9-Forward       | agcaggaagccaagtacgg      |
| Pax9-Reverse       | tggatgctgagacgaaactg     |
| Pitx2-Forward      | ccttacggaagcccaggt       |
| Pitx2-Reverse      | aaagccattcttgcacagc      |
| Shh-Forward        | ccaattacaacccccgacatc    |
| Shh-Reverse        | gcatttaactgtctttgcacct   |
