# Supplementary material for: Developmental plasticity of epithelial stem cells in tooth and taste bud renewal
Source: PubMed Central journal article supplement — Proc Natl Acad Sci U S A. 2019 Aug 19;116(36):17858–66. doi: 10.1073/pnas.1821202116 (PMC6731641; doi:10.1073/pnas.1821202116), 2019-08-19
Supplement: pnas.1821202116.sd06.pdf [file pnas.1821202116.sd06.pdf]

| Name  | Vector          | 5' clone site | 3' clone site | Anti-sense probe | Sense probe |
|-------|-----------------|---------------|---------------|------------------|-------------|
| Barx1 | pT7T3D-Pacl     | EcoRI         | NotI          | T3               | T7          |
| Bmp7  | pGEM-3          | HindIII       | EcoRI         | T7               | Sp6         |
| Dlx1  | pT7T3D-Pacl     | EcoRI         | NotI          | T3               | T7          |
| Foxa2 | pT7T3D-Pacl     | EcoRI         | NotI          | T3               | T7          |
| Gli1  | pBluscript SK   | NotI          |               | T3               |             |
| Lgr5  | pT7T3D-Pacl     | EcoRI         | NotI          | T3               | T7          |
| Msx1  | pSP72           | Bgl II        | EcoRI         | SP6              |             |
| Msx2  | pSP72           | HindIII       | Bgl II        | T7               | SP6         |
| Osr2  | pT7T3D-Pacl     | EcoRI         | NotI          | T3               | T7          |
| Pax9  | pBluescript KS+ | Bam HI        | HindIII       | T3               | T7          |
| Pitx2 | pT7T3D-Pacl     | EcoRI         | NotI          | T3               | T7          |
| Shh   | p pBluscript SK | EcoRI         |               | T7               |             |
